# Supplementary material for: A benchmark study of aromaticity indexes for benzene, pyridine and the diazines – I. Ground state aromaticity
Source: Royal Society of Chemistry journal article supplement (doi:10.1039/d2ra00093h), 2022-01-01
Supplement: d2ra00093h1.pdf [file d2ra00093h1.pdf]

## - Supporting Information -

# A benchmark study of aromaticity indexes for benzene, pyridine and the diazines - I. Ground state aromaticity

Jacob Pedersen<sup>†</sup> and Kurt V. Mikkelsen<sup>†\*</sup>

## Table of Contents

|       |                               |    |
|-------|-------------------------------|----|
| A     | Aromaticity Indexes . . . . . | 2  |
| A.1   | Benzene . . . . .             | 3  |
| A.1.1 | DFT . . . . .                 | 3  |
| A.1.2 | CCSD . . . . .                | 8  |
| A.1.3 | CASSCF(6,6) . . . . .         | 8  |
| A.1.4 | MP2 . . . . .                 | 9  |
| A.2   | Pyridine . . . . .            | 10 |
| A.2.1 | DFT . . . . .                 | 10 |
| A.2.2 | CCSD . . . . .                | 15 |
| A.2.3 | CASSCF(8,8) . . . . .         | 15 |
| A.2.4 | MP2 . . . . .                 | 16 |
| A.3   | Pyridazine . . . . .          | 17 |
| A.3.1 | DFT . . . . .                 | 17 |
| A.3.2 | CCSD . . . . .                | 22 |
| A.3.3 | CASSCF(8,8) . . . . .         | 22 |
| A.3.4 | MP2 . . . . .                 | 23 |
| A.4   | Pyrimidine . . . . .          | 24 |
| A.4.1 | DFT . . . . .                 | 24 |
| A.4.2 | CCSD . . . . .                | 29 |
| A.4.3 | CASSCF(8,8) . . . . .         | 29 |
| A.4.4 | MP2 . . . . .                 | 30 |
| A.5   | Pyrazine . . . . .            | 31 |
| A.5.1 | DFT . . . . .                 | 31 |

|       |                                                |    |
|-------|------------------------------------------------|----|
| A.5.2 | CCSD                                           | 36 |
| A.5.3 | CASSCF(8,8)                                    | 36 |
| A.5.4 | MP2                                            | 37 |
| B     | Statistical Summary of the Aromaticity Indexes | 38 |
| C     | Basis Set Performance Plots                    | 41 |
| C.1   | HOMA Index                                     | 41 |
| C.2   | PDI                                            | 44 |
| C.3   | MCI                                            | 47 |
| C.4   | AV1245 Index                                   | 50 |
| C.5   | FLU Index                                      | 53 |
| C.6   | Electronic Energy                              | 56 |
| C.7   | Zero Point Energy                              | 59 |
| C.8   | Sum of Electronic Energy and ZPE               | 62 |
| D     | Benchmark Plots                                | 65 |
| D.1   | HOMA Index                                     | 65 |
| D.2   | PDI                                            | 68 |
| D.3   | MCI                                            | 71 |
| D.4   | AV1245 Index                                   | 74 |
| D.5   | FLU Index                                      | 77 |
| D.6   | Electronic Energy                              | 80 |
| D.7   | Zero Point Energy                              | 83 |
| D.8   | Sum of Electronic Energy and ZPE               | 86 |
| E     | Internal Coordinate Representations            | 89 |
| F     | Route Section and Calculation Setup            | 91 |

## A Aromaticity Indexes

All the calculated aromaticity indexes as well as the electronic energies, zero point energies and sums of electronic and zero point energy for all five molecules in their ground states are listed in the following pages. The aromaticity indexes are all unitless, whereas all energetics are in atomic units. 'Energy' refers to the electronic energy, 'ZPE' refers to the zero point energy and 'Energy+ZPE' refers to the sum of electronic and zero-point energy. The associated molecule is specified in the table label in top of each table, and the level of theory used to obtain the results are specified above each set of results. The MCI and FLU index values are given in scientific notation, where 'Xe-Y' = 'X $\cdot$ 10<sup>-Y</sup>'.

## A.1 Benzene

### A.1.1 DFT

Table 1: Molecule: Benzene

---

---

Level of Theory: LSDA

---

| Basis set     | HOMA  | PDI    | MCI      | AV1245 | FLU      | Energy<br>(a.u.) | ZPE<br>(a.u.) | Energy+ZPE<br>(a.u.) |
|---------------|-------|--------|----------|--------|----------|------------------|---------------|----------------------|
| 6-31+G(d)     | 0.996 | 0.1071 | 7.75e-02 | 11.28  | 3.20e-05 | -230.912412      | 0.098374      | -230.814038          |
| 6-31++G(d,p)  | 0.996 | 0.1059 | 7.56e-02 | 11.03  | 0.00e+00 | -230.920585      | 0.098183      | -230.822402          |
| 6-311+G(d)    | 1.000 | 0.1083 | 7.62e-02 | 11.15  | 3.90e-05 | -230.955363      | 0.097907      | -230.857456          |
| 6-311++G(d,p) | 1.000 | 0.1066 | 7.37e-02 | 10.82  | 0.00e+00 | -230.965773      | 0.097898      | -230.867875          |
| Def2SVP       | 0.995 | 0.1066 | 7.59e-02 | 11.12  | 8.00e-06 | -230.743074      | 0.098398      | -230.644676          |
| Def2SVPD      | 0.996 | 0.1076 | 7.33e-02 | 10.73  | 0.00e+00 | -230.756202      | 0.098321      | -230.657881          |
| Def2TZVP      | 1.004 | 0.1086 | 7.35e-02 | 10.81  | 3.00e-06 | -230.992565      | 0.097973      | -230.894592          |
| Def2TZVPD     | 1.004 | 0.1080 | 7.29e-02 | 10.68  | 1.00e-06 | -230.993556      | 0.097942      | -230.895614          |
| cc-pVDZ       | 0.995 | 0.1071 | 7.53e-02 | 11.05  | 1.00e-06 | -230.908588      | 0.098081      | -230.810507          |
| aug-cc-pVDZ   | 0.995 | 0.1073 | 7.26e-02 | 10.65  | 1.10e-05 | -230.920365      | 0.097882      | -230.822483          |
| cc-pVTZ       | 1.005 | 0.1080 | 7.27e-02 | 10.71  | 0.00e+00 | -230.991771      | 0.098116      | -230.893655          |
| aug-cc-pVTZ   | 1.004 | 0.1076 | 7.20e-02 | 10.58  | 1.00e-06 | -230.993461      | 0.098017      | -230.895444          |

---

---

Level of Theory: PBE

---

|               |       |        |          |       |          |             |          |             |
|---------------|-------|--------|----------|-------|----------|-------------|----------|-------------|
| 6-31+G(d)     | 0.930 | 0.1053 | 7.69e-02 | 11.20 | 2.00e-06 | -231.944980 | 0.097945 | -231.847035 |
| 6-31++G(d,p)  | 0.931 | 0.1039 | 7.47e-02 | 10.91 | 5.50e-05 | -231.953977 | 0.097815 | -231.856162 |
| 6-311+G(d)    | 0.961 | 0.1063 | 7.59e-02 | 11.10 | 0.00e+00 | -231.984303 | 0.097500 | -231.886803 |
| 6-311++G(d,p) | 0.961 | 0.1045 | 7.32e-02 | 10.74 | 5.80e-05 | -231.994889 | 0.097496 | -231.897393 |
| Def2SVP       | 0.931 | 0.1044 | 7.48e-02 | 10.98 | 3.50e-05 | -231.773819 | 0.098023 | -231.675796 |
| Def2SVPD      | 0.933 | 0.1049 | 7.24e-02 | 10.61 | 7.10e-05 | -231.783717 | 0.097961 | -231.685756 |
| Def2TZVP      | 0.979 | 0.1063 | 7.30e-02 | 10.73 | 2.90e-05 | -232.019082 | 0.097433 | -231.921649 |
| Def2TZVPD     | 0.978 | 0.1056 | 7.22e-02 | 10.58 | 4.40e-05 | -232.020148 | 0.097604 | -231.922544 |
| cc-pVDZ       | 0.935 | 0.1050 | 7.42e-02 | 10.91 | 8.20e-05 | -231.951734 | 0.097793 | -231.853941 |
| aug-cc-pVDZ   | 0.930 | 0.1047 | 7.18e-02 | 10.54 | 1.29e-04 | -231.963053 | 0.097395 | -231.865658 |
| cc-pVTZ       | 0.980 | 0.1058 | 7.24e-02 | 10.66 | 5.60e-05 | -232.014668 | 0.097680 | -231.916988 |
| aug-cc-pVTZ   | 0.979 | 0.1052 | 7.15e-02 | 10.50 | 7.10e-05 | -232.017133 | 0.097630 | -231.919503 |

---

---

Table 2: Molecule: Benzene

| Level of Theory: PBE0 |       |        |          |        |          |                  |               |                      |
|-----------------------|-------|--------|----------|--------|----------|------------------|---------------|----------------------|
| Basis set             | HOMA  | PDI    | MCI      | AV1245 | FLU      | Energy<br>(a.u.) | ZPE<br>(a.u.) | Energy+ZPE<br>(a.u.) |
| 6-31+G(d)             | 0.990 | 0.1043 | 7.55e-02 | 11.04  | 0.00e+00 | -231.972105      | 0.101367      | -231.870738          |
| 6-31++G(d,p)          | 0.991 | 0.1028 | 7.31e-02 | 10.74  | 3.90e-05 | -231.981305      | 0.101181      | -231.880124          |
| 6-311+G(d)            | 0.998 | 0.1052 | 7.46e-02 | 10.96  | 2.00e-06 | -232.009242      | 0.100850      | -231.908392          |
| 6-311++G(d,p)         | 0.998 | 0.1034 | 7.19e-02 | 10.60  | 3.60e-05 | -232.019816      | 0.100764      | -231.919052          |
| Def2SVP               | 0.989 | 0.1032 | 7.30e-02 | 10.77  | 2.80e-05 | -231.802063      | 0.101251      | -231.700812          |
| Def2SVPD              | 0.989 | 0.1035 | 7.12e-02 | 10.47  | 4.90e-05 | -231.809265      | 0.100792      | -231.708473          |
| Def2TZVP              | 1.000 | 0.1051 | 7.18e-02 | 10.59  | 1.30e-05 | -232.045113      | 0.100687      | -231.944426          |
| Def2TZVPD             | 1.000 | 0.1044 | 7.11e-02 | 10.47  | 2.20e-05 | -232.045901      | 0.100846      | -231.945055          |
| cc-pVDZ               | 0.990 | 0.1037 | 7.24e-02 | 10.70  | 6.90e-05 | -231.982133      | 0.101040      | -231.881093          |
| aug-cc-pVDZ           | 0.989 | 0.1034 | 7.05e-02 | 10.39  | 9.70e-05 | -231.990694      | 0.100622      | -231.890072          |
| cc-pVTZ               | 1.000 | 0.1045 | 7.12e-02 | 10.52  | 3.30e-05 | -232.040612      | 0.100889      | -231.939723          |
| aug-cc-pVTZ           | 1.000 | 0.1040 | 7.04e-02 | 10.39  | 4.10e-05 | -232.042469      | 0.100818      | -231.941651          |

  

| Level of Theory: B3LYP |       |        |          |       |          |             |          |             |
|------------------------|-------|--------|----------|-------|----------|-------------|----------|-------------|
| 6-31+G(d)              | 0.973 | 0.1039 | 7.56e-02 | 11.04 | 1.00e-06 | -232.258917 | 0.100566 | -232.158351 |
| 6-31++G(d,p)           | 0.975 | 0.1024 | 7.32e-02 | 10.73 | 5.50e-05 | -232.268439 | 0.100408 | -232.168031 |
| 6-311+G(d)             | 0.989 | 0.1048 | 7.45e-02 | 10.93 | 0.00e+00 | -232.300696 | 0.100111 | -232.200585 |
| 6-311++G(d,p)          | 0.990 | 0.1029 | 7.17e-02 | 10.56 | 5.90e-05 | -232.311295 | 0.100060 | -232.211235 |
| Def2SVP                | 0.972 | 0.1030 | 7.35e-02 | 10.83 | 3.20e-05 | -232.084722 | 0.100531 | -231.984191 |
| Def2SVPD               | 0.973 | 0.1032 | 7.10e-02 | 10.44 | 6.90e-05 | -232.094944 | 0.100688 | -231.994256 |
| Def2TZVP               | 0.998 | 0.1045 | 7.17e-02 | 10.57 | 2.60e-05 | -232.337354 | 0.100166 | -232.237188 |
| Def2TZVPD              | 0.998 | 0.1038 | 7.10e-02 | 10.44 | 3.90e-05 | -232.338200 | 0.100339 | -232.237861 |
| cc-pVDZ                | 0.973 | 0.1035 | 7.30e-02 | 10.77 | 7.80e-05 | -232.262946 | 0.100277 | -232.162669 |
| aug-cc-pVDZ            | 0.970 | 0.1029 | 7.05e-02 | 10.38 | 1.25e-04 | -232.274578 | 0.099964 | -232.174614 |
| cc-pVTZ                | 0.998 | 0.1039 | 7.10e-02 | 10.48 | 5.70e-05 | -232.333367 | 0.100385 | -232.232982 |
| aug-cc-pVTZ            | 0.998 | 0.1032 | 7.01e-02 | 10.33 | 7.00e-05 | -232.335567 | 0.100346 | -232.235221 |

Table 3: Molecule: Benzene

| Level of Theory: CAM-B3LYP |       |        |          |        |          |                  |               |                      |
|----------------------------|-------|--------|----------|--------|----------|------------------|---------------|----------------------|
| Basis set                  | HOMA  | PDI    | MCI      | AV1245 | FLU      | Energy<br>(a.u.) | ZPE<br>(a.u.) | Energy+ZPE<br>(a.u.) |
| 6-31+G(d)                  | 0.995 | 0.1038 | 7.54e-02 | 11.02  | 2.00e-06 | -232.114658      | 0.101784      | -232.012874          |
| 6-31++G(d,p)               | 0.995 | 0.1023 | 7.31e-02 | 10.72  | 2.20e-05 | -232.123887      | 0.101586      | -232.022301          |
| 6-311+G(d)                 | 1.000 | 0.1046 | 7.43e-02 | 10.91  | 5.00e-06 | -232.157234      | 0.101327      | -232.055907          |
| 6-311++G(d,p)              | 1.000 | 0.1029 | 7.16e-02 | 10.56  | 2.50e-05 | -232.167396      | 0.101212      | -232.066184          |
| Def2SVP                    | 0.993 | 0.1030 | 7.34e-02 | 10.82  | 9.00e-06 | -231.940710      | 0.101626      | -231.839084          |
| Def2SVPD                   | 0.994 | 0.1031 | 7.11e-02 | 10.48  | 2.80e-05 | -231.950770      | 0.101745      | -231.849025          |
| Def2TZVP                   | 1.002 | 0.1043 | 7.17e-02 | 10.58  | 5.00e-06 | -232.193957      | 0.101306      | -232.092651          |
| Def2TZVPD                  | 1.002 | 0.1036 | 7.11e-02 | 10.48  | 1.00e-05 | -232.194686      | 0.101423      | -232.093263          |
| cc-pVDZ                    | 0.994 | 0.1034 | 7.29e-02 | 10.77  | 3.50e-05 | -232.118155      | 0.101400      | -232.016755          |
| aug-cc-pVDZ                | 0.993 | 0.1028 | 7.06e-02 | 10.42  | 6.50e-05 | -232.129697      | 0.101117      | -232.028580          |
| cc-pVTZ                    | 1.002 | 0.1037 | 7.09e-02 | 10.50  | 2.20e-05 | -232.189902      | 0.101501      | -232.088401          |
| aug-cc-pVTZ                | 1.002 | 0.1032 | 7.02e-02 | 10.37  | 2.80e-05 | -232.192054      | 0.101431      | -232.090623          |

  

| Level of Theory: wB97XD |       |        |          |       |          |             |          |             |
|-------------------------|-------|--------|----------|-------|----------|-------------|----------|-------------|
| 6-31+G(d)               | 0.991 | 0.1039 | 7.54e-02 | 11.04 | 0.00e+00 | -232.172008 | 0.101777 | -232.070231 |
| 6-31++G(d,p)            | 0.991 | 0.1024 | 7.31e-02 | 10.75 | 3.20e-05 | -232.180851 | 0.101587 | -232.079264 |
| 6-311+G(d)              | 0.998 | 0.1047 | 7.46e-02 | 10.96 | 2.00e-06 | -232.211000 | 0.101184 | -232.109816 |
| 6-311++G(d,p)           | 0.998 | 0.1029 | 7.19e-02 | 10.61 | 3.20e-05 | -232.221024 | 0.101118 | -232.119906 |
| Def2SVP                 | 0.988 | 0.1028 | 7.30e-02 | 10.78 | 2.40e-05 | -232.001441 | 0.101538 | -231.899903 |
| Def2SVPD                | 0.989 | 0.1032 | 7.14e-02 | 10.53 | 4.00e-05 | -232.008588 | 0.101376 | -231.907212 |
| Def2TZVP                | 1.000 | 0.1042 | 7.19e-02 | 10.62 | 1.00e-05 | -232.246592 | 0.101256 | -232.145336 |
| Def2TZVPD               | 1.000 | 0.1037 | 7.14e-02 | 10.54 | 1.60e-05 | -232.247198 | 0.101310 | -232.145888 |
| cc-pVDZ                 | 0.989 | 0.1032 | 7.24e-02 | 10.72 | 5.90e-05 | -232.180421 | 0.101355 | -232.079066 |
| aug-cc-pVDZ             | 0.988 | 0.1030 | 7.08e-02 | 10.46 | 7.90e-05 | -232.188905 | 0.101029 | -232.087876 |
| cc-pVTZ                 | 1.000 | 0.1036 | 7.11e-02 | 10.53 | 3.30e-05 | -232.241920 | 0.101422 | -232.140498 |
| aug-cc-pVTZ             | 1.000 | 0.1032 | 7.06e-02 | 10.44 | 3.80e-05 | -232.243844 | 0.101310 | -232.142534 |

Table 4: Molecule: Benzene

| Level of Theory: M06-2X   |       |        |          |        |          |                  |               |                      |
|---------------------------|-------|--------|----------|--------|----------|------------------|---------------|----------------------|
| Basis set                 | HOMA  | PDI    | MCI      | AV1245 | FLU      | Energy<br>(a.u.) | ZPE<br>(a.u.) | Energy+ZPE<br>(a.u.) |
| 6-31+G(d)                 | 0.990 | 0.1039 | 7.52e-02 | 11.00  | 0.00e+00 | -232.144424      | 0.101498      | -232.042926          |
| 6-31++G(d,p)              | 0.989 | 0.1024 | 7.30e-02 | 10.72  | 4.60e-05 | -232.152083      | 0.101259      | -232.050824          |
| 6-311+G(d)                | 0.996 | 0.1047 | 7.44e-02 | 10.92  | 0.00e+00 | -232.190265      | 0.101258      | -232.089007          |
| 6-311++G(d,p)             | 0.997 | 0.1031 | 7.19e-02 | 10.60  | 4.10e-05 | -232.198410      | 0.101083      | -232.097327          |
| Def2SVP                   | 0.989 | 0.1029 | 7.28e-02 | 10.75  | 2.80e-05 | -231.968791      | 0.101413      | -231.867378          |
| Def2SVPD                  | 0.989 | 0.1035 | 7.10e-02 | 10.46  | 5.00e-05 | -231.976309      | 0.101183      | -231.875126          |
| Def2TZVP                  | 1.000 | 0.1042 | 7.19e-02 | 10.61  | 1.80e-05 | -232.224623      | 0.101182      | -232.123441          |
| Def2TZVPD                 | 1.000 | 0.1037 | 7.14e-02 | 10.52  | 2.50e-05 | -232.225137      | 0.101182      | -232.123955          |
| cc-pVDZ                   | 0.990 | 0.1033 | 7.25e-02 | 10.71  | 7.10e-05 | -232.162454      | 0.101086      | -232.061368          |
| aug-cc-pVDZ               | 0.988 | 0.1032 | 7.05e-02 | 10.40  | 1.01e-04 | -232.172150      | 0.100875      | -232.071275          |
| cc-pVTZ                   | 1.000 | 0.1037 | 7.10e-02 | 10.51  | 4.60e-05 | -232.222506      | 0.101292      | -232.121214          |
| aug-cc-pVTZ               | 1.000 | 0.1034 | 7.05e-02 | 10.41  | 5.20e-05 | -232.224448      | 0.100994      | -232.123454          |
| Level of Theory: SOGGA11X |       |        |          |        |          |                  |               |                      |
| Basis set                 | HOMA  | PDI    | MCI      | AV1245 | FLU      | Energy<br>(a.u.) | ZPE<br>(a.u.) | Energy+ZPE<br>(a.u.) |
| 6-31+G(d)                 | 0.979 | 0.1029 | 7.40e-02 | 10.87  | 7.00e-06 | -232.194690      | 0.102571      | -232.092119          |
| 6-31++G(d,p)              | 0.980 | 0.1011 | 7.14e-02 | 10.53  | 1.01e-04 | -232.205014      | 0.102326      | -232.102688          |
| 6-311+G(d)                | 0.990 | 0.1037 | 7.35e-02 | 10.82  | 1.00e-06 | -232.232397      | 0.101934      | -232.130463          |
| 6-311++G(d,p)             | 0.990 | 0.1018 | 7.07e-02 | 10.45  | 7.40e-05 | -232.242878      | 0.101810      | -232.141068          |
| Def2SVP                   | 0.978 | 0.1014 | 7.11e-02 | 10.54  | 8.70e-05 | -232.021342      | 0.102332      | -231.919010          |
| Def2SVPD                  | 0.977 | 0.1017 | 6.96e-02 | 10.28  | 1.08e-04 | -232.026458      | 0.101882      | -231.924576          |
| Def2TZVP                  | 0.998 | 0.1031 | 7.07e-02 | 10.46  | 4.30e-05 | -232.267630      | 0.102023      | -232.165607          |
| Def2TZVPD                 | 0.998 | 0.1024 | 7.01e-02 | 10.35  | 5.80e-05 | -232.268319      | 0.102114      | -232.166205          |
| cc-pVDZ                   | 0.980 | 0.1019 | 7.06e-02 | 10.49  | 1.49e-04 | -232.209889      | 0.102124      | -232.107765          |
| aug-cc-pVDZ               | 0.977 | 0.1015 | 6.89e-02 | 10.21  | 1.71e-04 | -232.216717      | 0.101726      | -232.114991          |
| cc-pVTZ                   | 0.998 | 0.1025 | 6.98e-02 | 10.36  | 8.80e-05 | -232.260782      | 0.102093      | -232.158689          |
| aug-cc-pVTZ               | 0.998 | 0.1022 | 6.93e-02 | 10.26  | 9.50e-05 | -232.263097      | 0.101850      | -232.161247          |

Table 5: Molecule: Benzene

| Level of Theory: M11 |       |        |          |        |          |                  |               |                      |
|----------------------|-------|--------|----------|--------|----------|------------------|---------------|----------------------|
| Basis set            | HOMA  | PDI    | MCI      | AV1245 | FLU      | Energy<br>(a.u.) | ZPE<br>(a.u.) | Energy+ZPE<br>(a.u.) |
| 6-31+G(d)            | 0.990 | 0.1047 | 7.63e-02 | 11.14  | 1.20e-05 | -232.093462      | 0.100747      | -231.992715          |
| 6-31++G(d,p)         | 0.991 | 0.1035 | 7.44e-02 | 10.89  | 4.00e-06 | -232.100978      | 0.100506      | -232.000472          |
| 6-311+G(d)           | 0.999 | 0.1056 | 7.54e-02 | 11.05  | 1.50e-05 | -232.138216      | 0.100167      | -232.038049          |
| 6-311++G(d,p)        | 0.999 | 0.1041 | 7.31e-02 | 10.76  | 5.00e-06 | -232.146296      | 0.100094      | -232.046202          |
| Def2SVP              | 0.989 | 0.1039 | 7.45e-02 | 10.96  | 0.00e+00 | -231.911444      | 0.100494      | -231.810950          |
| Def2SVPD             | 0.991 | 0.1044 | 7.36e-02 | 10.79  | 1.00e-06 | -231.918549      | 0.099649      | -231.818900          |
| Def2TZVP             | 1.000 | 0.1052 | 7.34e-02 | 10.80  | 1.00e-06 | -232.179587      | 0.100692      | -232.078895          |
| Def2TZVPD            | 1.000 | 0.1047 | 7.30e-02 | 10.73  | 0.00e+00 | -232.180698      | 0.100409      | -232.080289          |
| cc-pVDZ              | 0.988 | 0.1042 | 7.40e-02 | 10.90  | 1.00e-05 | -232.101479      | 0.100198      | -232.001281          |
| aug-cc-pVDZ          | 0.989 | 0.1043 | 7.27e-02 | 10.70  | 1.60e-05 | -232.110377      | 0.099885      | -232.010492          |
| cc-pVTZ              | 1.001 | 0.1042 | 7.17e-02 | 10.60  | 1.20e-05 | -232.180997      | 0.101176      | -232.079821          |
| aug-cc-pVTZ          | 1.001 | 0.1038 | 7.15e-02 | 10.55  | 1.40e-05 | -232.185019      | 0.100110      | -232.084909          |

  

| Level of Theory: MN15 |       |        |          |       |          |             |          |             |
|-----------------------|-------|--------|----------|-------|----------|-------------|----------|-------------|
| 6-31+G(d)             | 0.980 | 0.1048 | 7.54e-02 | 11.04 | 4.00e-06 | -231.959035 | 0.100983 | -231.858052 |
| 6-31++G(d,p)          | 0.981 | 0.1035 | 7.33e-02 | 10.77 | 1.30e-05 | -231.966445 | 0.100739 | -231.865706 |
| 6-311+G(d)            | 0.994 | 0.1057 | 7.43e-02 | 10.92 | 8.00e-06 | -231.993678 | 0.100631 | -231.893047 |
| 6-311++G(d,p)         | 0.994 | 0.1041 | 7.18e-02 | 10.60 | 1.40e-05 | -232.002359 | 0.100605 | -231.901754 |
| Def2SVP               | 0.981 | 0.1039 | 7.32e-02 | 10.80 | 7.00e-06 | -231.750141 | 0.101266 | -231.648875 |
| Def2SVPD              | 0.982 | 0.1048 | 7.08e-02 | 10.44 | 2.50e-05 | -231.762763 | 0.101292 | -231.661471 |
| Def2TZVP              | 0.999 | 0.1058 | 7.15e-02 | 10.55 | 5.00e-06 | -232.028399 | 0.100680 | -231.927719 |
| Def2TZVPD             | 0.999 | 0.1053 | 7.10e-02 | 10.47 | 9.00e-06 | -232.029440 | 0.100432 | -231.929008 |
| cc-pVDZ               | 0.981 | 0.1044 | 7.27e-02 | 10.74 | 3.10e-05 | -231.958821 | 0.100790 | -231.858031 |
| aug-cc-pVDZ           | 0.979 | 0.1045 | 7.02e-02 | 10.37 | 5.90e-05 | -231.973033 | 0.100277 | -231.872756 |
| cc-pVTZ               | 1.000 | 0.1055 | 7.10e-02 | 10.52 | 1.40e-05 | -232.025170 | 0.100805 | -231.924365 |
| aug-cc-pVTZ           | 1.000 | 0.1054 | 7.04e-02 | 10.42 | 1.70e-05 | -232.030289 | 0.100598 | -231.929691 |

### A.1.2 CCSD

Table 6: Molecule: Benzene

| Basis set     | HOMA  | PDI    | MCI      | AV1245 | FLU      | Energy<br>(a.u.) | ZPE<br>(a.u.) | Energy+ZPE<br>(a.u.) |
|---------------|-------|--------|----------|--------|----------|------------------|---------------|----------------------|
| 6-31+G(d)     | 0.969 | 0.0600 | 5.00e-02 | 7.705  | 2.72e-02 | -231.507671      | 0.099626      | -231.408045          |
| 6-31++G(d,p)  | 0.972 | 0.0588 | 4.81e-02 | 7.451  | 2.94e-02 | -231.555888      | 0.098974      | -231.456914          |
| 6-311+G(d)    | 0.963 | 0.0607 | 4.94e-02 | 7.668  | 2.78e-02 | -231.573622      | 0.097728      | -231.475894          |
| 6-311++G(d,p) | 0.963 | 0.0595 | 4.76e-02 | 7.413  | 3.00e-02 | -231.618261      | 0.097625      | -231.520636          |
| Def2SVP       | 0.960 | 0.0588 | 4.80e-02 | 7.460  | 2.89e-02 | -231.356875      | 0.100942      | -231.255933          |
| Def2SVPD      | 0.948 | 0.0590 | 4.66e-02 | 7.244  | 2.92e-02 | -231.390207      | 0.097484      | -231.292723          |
| Def2TZVP      | 0.996 | 0.0615 | 4.79e-02 | 7.499  | 2.69e-02 | -231.743063      | 0.100486      | -231.642577          |
| Def2TZVPD     | 0.995 | 0.0611 | 4.75e-02 | 7.424  | 2.72e-02 | -231.747027      | 0.100248      | -231.646779          |
| cc-pVDZ       | 0.918 | 0.0589 | 4.74e-02 | 7.405  | 3.07e-02 | -231.546045      | 0.100510      | -231.445535          |
| aug-cc-pVDZ   | 0.902 | 0.0591 | 4.59e-02 | 7.184  | 3.10e-02 | -231.576264      | 0.099348      | -231.476916          |
| cc-pVTZ       | 0.995 | 0.0610 | 4.75e-02 | 7.446  | 2.76e-02 | -231.753923      | 0.101074      | -231.652849          |
| aug-cc-pVTZ   | 0.995 | 0.0609 | 4.70e-02 | 7.364  | 2.77e-02 | -231.766868      | 0.100488      | -231.666380          |

### A.1.3 CASSCF(6,6)

Table 7: Molecule: Benzene

| Basis set  | HOMA  | PDI    | MCI      | AV1245 | FLU      | Energy<br>(a.u.) | ZPE<br>(a.u.) | Energy+ZPE<br>(a.u.) |
|------------|-------|--------|----------|--------|----------|------------------|---------------|----------------------|
| 6-31+G(d)  | 0.998 | 0.1010 | 7.20e-02 | 10.64  | 6.00e-06 | -230.750885      | 0.107340      | -230.643545          |
| 6-311+G(d) | 1.000 | 0.1017 | 7.15e-02 | 10.60  | 0.00e+00 | -230.785806      | 0.106602      | -230.679204          |
| Def2SVP    | 0.952 | 0.0991 | 6.86e-02 | 10.22  | 2.90e-04 | -230.601590      | 0.105609      | -230.495981          |
| Def2TZVP   | 0.990 | 0.1005 | 6.84e-02 | 10.19  | 4.16e-04 | -230.829820      | 0.114912      | -230.714908          |
| cc-pVDZ    | 0.997 | 0.0997 | 6.80e-02 | 10.20  | 1.75e-04 | -230.762620      | 0.106609      | -230.656011          |
| cc-pVTZ    | 1.002 | 0.1004 | 6.81e-02 | 10.18  | 6.20e-05 | -230.820313      | 0.107310      | -230.713003          |



### A.1.4 MP2

Table 8: Molecule: Benzene

| Basis set     | HOMA  | PDI    | MCI      | AV1245 | FLU      | Energy<br>(a.u.) | ZPE<br>(a.u.) | Energy+ZPE<br>(a.u.) |
|---------------|-------|--------|----------|--------|----------|------------------|---------------|----------------------|
| 6-31+G(d)     | 0.970 | 0.0605 | 5.16e-02 | 7.824  | 2.45e-02 | -231.472025      | 0.099213      | -231.372812          |
| 6-31++G(d,p)  | 0.971 | 0.0593 | 4.95e-02 | 7.540  | 2.67e-02 | -231.519692      | 0.101550      | -231.418142          |
| 6-311+G(d)    | 0.964 | 0.0608 | 5.05e-02 | 7.705  | 2.51e-02 | -231.540477      | 0.097788      | -231.442689          |
| 6-311++G(d,p) | 0.964 | 0.0594 | 4.86e-02 | 7.435  | 2.73e-02 | -231.584255      | 0.097160      | -231.487095          |
| Def2SVP       | 0.963 | 0.0595 | 4.99e-02 | 7.619  | 2.60e-02 | -231.316557      | 0.100834      | -231.215723          |
| Def2SVPD      | 0.944 | 0.0592 | 4.74e-02 | 7.244  | 2.68e-02 | -231.354127      | 0.097276      | -231.256851          |
| Def2TZVP      | 0.993 | 0.0607 | 4.78e-02 | 7.375  | 2.55e-02 | -231.715589      | 0.100004      | -231.615585          |
| Def2TZVPD     | 0.992 | 0.0602 | 4.72e-02 | 7.267  | 2.59e-02 | -231.720163      | 0.099840      | -231.620323          |
| cc-pVDZ       | 0.920 | 0.0594 | 4.88e-02 | 7.500  | 2.78e-02 | -231.506454      | 0.100524      | -231.405930          |
| aug-cc-pVDZ   | 0.897 | 0.0590 | 4.64e-02 | 7.139  | 2.85e-02 | -231.540220      | 0.099262      | -231.440958          |
| cc-pVTZ       | 0.993 | 0.0602 | 4.74e-02 | 7.322  | 2.63e-02 | -231.729479      | 0.100719      | -231.628760          |
| aug-cc-pVTZ   | 0.991 | 0.0599 | 4.66e-02 | 7.187  | 2.65e-02 | -231.744661      | 0.100086      | -231.644575          |

## A.2 Pyridine

### A.2.1 DFT

Table 9: Molecule: Pyridine

---

---

Level of Theory: LSDA

---

| Basis set     | HOMA  | PDI    | MCI      | AV1245 | FLU      | Energy<br>(a.u.) | ZPE<br>(a.u.) | Energy+ZPE<br>(a.u.) |
|---------------|-------|--------|----------|--------|----------|------------------|---------------|----------------------|
| 6-31+G(d)     | 0.998 | 0.1064 | 7.14e-02 | 10.57  | 5.19e-03 | -246.885495      | 0.086960      | -246.798535          |
| 6-31++G(d,p)  | 0.999 | 0.1055 | 7.01e-02 | 10.39  | 4.99e-03 | -246.891944      | 0.086770      | -246.805174          |
| 6-311+G(d)    | 1.001 | 0.1079 | 7.20e-02 | 10.62  | 7.77e-03 | -246.933708      | 0.086531      | -246.847177          |
| 6-311++G(d,p) | 1.001 | 0.1067 | 7.01e-02 | 10.38  | 7.37e-03 | -246.941846      | 0.086415      | -246.855431          |
| Def2SVP       | 0.996 | 0.1059 | 6.99e-02 | 10.44  | 4.46e-03 | -246.699945      | 0.086892      | -246.613053          |
| Def2SVPD      | 0.997 | 0.1075 | 6.76e-02 | 10.14  | 4.76e-03 | -246.716639      | 0.086837      | -246.629802          |
| Def2TZVP      | 1.006 | 0.1086 | 6.94e-02 | 10.32  | 7.95e-03 | -246.970576      | 0.086639      | -246.883937          |
| Def2TZVPD     | 1.006 | 0.1083 | 6.89e-02 | 10.23  | 7.85e-03 | -246.971797      | 0.086594      | -246.885203          |
| cc-pVDZ       | 0.997 | 0.1068 | 7.05e-02 | 10.49  | 5.99e-03 | -246.881141      | 0.086566      | -246.794575          |
| aug-cc-pVDZ   | 0.998 | 0.1075 | 6.84e-02 | 10.18  | 6.53e-03 | -246.895940      | 0.086467      | -246.809473          |
| cc-pVTZ       | 1.006 | 0.1081 | 6.86e-02 | 10.24  | 7.40e-03 | -246.968158      | 0.086603      | -246.881555          |
| aug-cc-pVTZ   | 1.006 | 0.1079 | 6.80e-02 | 10.14  | 7.19e-03 | -246.970731      | 0.086551      | -246.884180          |

---

---

Level of Theory: PBE

---

|               |       |        |          |       |          |             |          |             |
|---------------|-------|--------|----------|-------|----------|-------------|----------|-------------|
| 6-31+G(d)     | 0.954 | 0.1050 | 7.16e-02 | 10.56 | 5.26e-03 | -247.978616 | 0.086436 | -247.892180 |
| 6-31++G(d,p)  | 0.955 | 0.1039 | 7.00e-02 | 10.35 | 5.07e-03 | -247.985807 | 0.086288 | -247.899519 |
| 6-311+G(d)    | 0.975 | 0.1062 | 7.22e-02 | 10.61 | 7.38e-03 | -248.023275 | 0.086044 | -247.937231 |
| 6-311++G(d,p) | 0.974 | 0.1049 | 7.01e-02 | 10.34 | 7.02e-03 | -248.031580 | 0.085943 | -247.945637 |
| Def2SVP       | 0.952 | 0.1042 | 7.00e-02 | 10.41 | 4.70e-03 | -247.790780 | 0.086358 | -247.704422 |
| Def2SVPD      | 0.956 | 0.1053 | 6.77e-02 | 10.11 | 4.77e-03 | -247.804249 | 0.086238 | -247.718011 |
| Def2TZVP      | 0.987 | 0.1065 | 6.94e-02 | 10.29 | 7.46e-03 | -248.057518 | 0.086083 | -247.971435 |
| Def2TZVPD     | 0.986 | 0.1061 | 6.88e-02 | 10.18 | 7.38e-03 | -248.058750 | 0.086090 | -247.972660 |
| cc-pVDZ       | 0.954 | 0.1051 | 7.05e-02 | 10.45 | 6.39e-03 | -247.984586 | 0.086121 | -247.898465 |
| aug-cc-pVDZ   | 0.953 | 0.1052 | 6.85e-02 | 10.14 | 6.58e-03 | -247.999091 | 0.085982 | -247.913109 |
| cc-pVTZ       | 0.988 | 0.1061 | 6.88e-02 | 10.23 | 7.03e-03 | -248.051184 | 0.086084 | -247.965100 |
| aug-cc-pVTZ   | 0.987 | 0.1057 | 6.79e-02 | 10.09 | 6.76e-03 | -248.054583 | 0.086049 | -247.968534 |

---

---

Table 10: Molecule: Pyridine

| Level of Theory: PBE0 |       |        |          |        |          |                  |               |                      |
|-----------------------|-------|--------|----------|--------|----------|------------------|---------------|----------------------|
| Basis set             | HOMA  | PDI    | MCI      | AV1245 | FLU      | Energy<br>(a.u.) | ZPE<br>(a.u.) | Energy+ZPE<br>(a.u.) |
| 6-31+G(d)             | 0.996 | 0.1030 | 6.79e-02 | 10.20  | 2.83e-03 | -247.997355      | 0.089632      | -247.907723          |
| 6-31++G(d,p)          | 0.996 | 0.1018 | 6.63e-02 | 9.979  | 2.73e-03 | -248.004762      | 0.089427      | -247.915335          |
| 6-311+G(d)            | 0.999 | 0.1043 | 6.90e-02 | 10.30  | 4.69e-03 | -248.040069      | 0.089188      | -247.950881          |
| 6-311++G(d,p)         | 0.999 | 0.1029 | 6.70e-02 | 10.03  | 4.42e-03 | -248.048394      | 0.089028      | -247.959366          |
| Def2SVP               | 0.993 | 0.1021 | 6.64e-02 | 10.04  | 2.71e-03 | -247.810696      | 0.089450      | -247.721246          |
| Def2SVPD              | 0.994 | 0.1032 | 6.44e-02 | 9.786  | 2.71e-03 | -247.821605      | 0.089219      | -247.732386          |
| Def2TZVP              | 1.001 | 0.1044 | 6.62e-02 | 9.967  | 4.63e-03 | -248.075727      | 0.089124      | -247.986603          |
| Def2TZVPD             | 1.001 | 0.1040 | 6.57e-02 | 9.881  | 4.57e-03 | -248.076639      | 0.089131      | -247.987508          |
| cc-pVDZ               | 0.995 | 0.1029 | 6.68e-02 | 10.06  | 3.65e-03 | -248.007126      | 0.089227      | -247.917899          |
| aug-cc-pVDZ           | 0.995 | 0.1030 | 6.51e-02 | 9.807  | 3.80e-03 | -248.018834      | 0.089042      | -247.929792          |
| cc-pVTZ               | 1.001 | 0.1040 | 6.56e-02 | 9.907  | 4.40e-03 | -248.069461      | 0.089122      | -247.980339          |
| aug-cc-pVTZ           | 1.001 | 0.1037 | 6.49e-02 | 9.795  | 4.20e-03 | -248.072159      | 0.089084      | -247.983075          |

  

| Level of Theory: B3LYP |       |        |          |       |          |             |          |             |
|------------------------|-------|--------|----------|-------|----------|-------------|----------|-------------|
| 6-31+G(d)              | 0.985 | 0.1029 | 6.91e-02 | 10.29 | 3.51e-03 | -248.295790 | 0.088872 | -248.206918 |
| 6-31++G(d,p)           | 0.986 | 0.1018 | 6.74e-02 | 10.07 | 3.38e-03 | -248.303433 | 0.088704 | -248.214729 |
| 6-311+G(d)             | 0.995 | 0.1042 | 6.99e-02 | 10.37 | 5.67e-03 | -248.342933 | 0.088455 | -248.254478 |
| 6-311++G(d,p)          | 0.995 | 0.1028 | 6.78e-02 | 10.01 | 5.36e-03 | -248.351256 | 0.088327 | -248.262929 |
| Def2SVP                | 0.983 | 0.1022 | 6.76e-02 | 10.16 | 3.09e-03 | -248.105301 | 0.088717 | -248.016584 |
| Def2SVPD               | 0.985 | 0.1030 | 6.52e-02 | 9.849 | 3.22e-03 | -248.118865 | 0.088631 | -248.030234 |
| Def2TZVP               | 0.999 | 0.1043 | 6.72e-02 | 10.05 | 5.71e-03 | -248.378996 | 0.088602 | -248.290394 |
| Def2TZVPD              | 0.999 | 0.1038 | 6.66e-02 | 9.957 | 5.63e-03 | -248.380004 | 0.088610 | -248.291394 |
| cc-pVDZ                | 0.984 | 0.1030 | 6.82e-02 | 10.21 | 4.35e-03 | -248.299525 | 0.088465 | -248.211060 |
| aug-cc-pVDZ            | 0.983 | 0.1030 | 6.62e-02 | 9.899 | 4.72e-03 | -248.314153 | 0.088340 | -248.225813 |
| cc-pVTZ                | 1.000 | 0.1037 | 6.64e-02 | 9.975 | 5.31e-03 | -248.373197 | 0.088608 | -248.284589 |
| aug-cc-pVTZ            | 1.000 | 0.1033 | 6.57e-02 | 9.849 | 5.10e-03 | -248.376249 | 0.088579 | -248.287670 |

Table 11: Molecule: Pyridine

Level of Theory: CAM-B3LYP

| Basis set     | HOMA  | PDI    | MCI      | AV1245 | FLU      | Energy<br>(a.u.) | ZPE<br>(a.u.) | Energy+ZPE<br>(a.u.) |
|---------------|-------|--------|----------|--------|----------|------------------|---------------|----------------------|
| 6-31+G(d)     | 0.998 | 0.1024 | 6.82e-02 | 10.21  | 3.02e-03 | -248.154012      | 0.090031      | -248.063981          |
| 6-31++G(d,p)  | 0.998 | 0.1013 | 6.66e-02 | 9.994  | 2.89e-03 | -248.161429      | 0.089831      | -248.071598          |
| 6-311+G(d)    | 1.000 | 0.1037 | 6.92e-02 | 10.29  | 5.23e-03 | -248.202043      | 0.089603      | -248.112440          |
| 6-311++G(d,p) | 1.000 | 0.1024 | 6.72e-02 | 10.04  | 4.92e-03 | -248.210037      | 0.089435      | -248.120602          |
| Def2SVP       | 0.996 | 0.1018 | 6.70e-02 | 10.10  | 2.68e-03 | -247.963862      | 0.089789      | -247.874073          |
| Def2SVPD      | 0.997 | 0.1026 | 6.48e-02 | 9.817  | 2.81e-03 | -247.977610      | 0.089676      | -247.887934          |
| Def2TZVP      | 1.004 | 0.1037 | 6.66e-02 | 9.997  | 5.24e-03 | -248.238405      | 0.089677      | -248.148728          |
| Def2TZVPD     | 1.004 | 0.1033 | 6.61e-02 | 9.924  | 5.17e-03 | -248.239367      | 0.089664      | -248.149703          |
| cc-pVDZ       | 0.998 | 0.1025 | 6.74e-02 | 10.13  | 3.67e-03 | -248.157257      | 0.089558      | -248.067699          |
| aug-cc-pVDZ   | 0.997 | 0.1024 | 6.56e-02 | 9.855  | 4.07e-03 | -248.172047      | 0.089431      | -248.082616          |
| cc-pVTZ       | 1.004 | 0.1032 | 6.59e-02 | 9.930  | 4.89e-03 | -248.232515      | 0.089679      | -248.142836          |
| aug-cc-pVTZ   | 1.004 | 0.1028 | 6.52e-02 | 9.819  | 4.69e-03 | -248.235578      | 0.089635      | -248.145943          |

Level of Theory: wB97XD

|               |       |        |          |       |          |             |          |             |
|---------------|-------|--------|----------|-------|----------|-------------|----------|-------------|
| 6-31+G(d)     | 0.996 | 0.1025 | 6.81e-02 | 10.21 | 2.79e-03 | -248.203755 | 0.089935 | -248.113820 |
| 6-31++G(d,p)  | 0.996 | 0.1014 | 6.65e-02 | 9.998 | 2.68e-03 | -248.210836 | 0.089739 | -248.121097 |
| 6-311+G(d)    | 0.999 | 0.1037 | 6.92e-02 | 10.31 | 4.80e-03 | -248.248069 | 0.089420 | -248.158649 |
| 6-311++G(d,p) | 1.000 | 0.1024 | 6.72e-02 | 10.06 | 4.52e-03 | -248.255939 | 0.089293 | -248.166646 |
| Def2SVP       | 0.993 | 0.1017 | 6.65e-02 | 10.05 | 2.61e-03 | -248.016503 | 0.089686 | -247.926817 |
| Def2SVPD      | 0.994 | 0.1026 | 6.48e-02 | 9.834 | 2.66e-03 | -248.027224 | 0.089487 | -247.937737 |
| Def2TZVP      | 1.001 | 0.1035 | 6.66e-02 | 10.01 | 4.81e-03 | -248.283477 | 0.089529 | -248.193948 |
| Def2TZVPD     | 1.001 | 0.1032 | 6.62e-02 | 9.954 | 4.74e-03 | -248.284282 | 0.089509 | -248.194773 |
| cc-pVDZ       | 0.995 | 0.1024 | 6.70e-02 | 10.08 | 3.59e-03 | -248.211971 | 0.089456 | -248.122515 |
| aug-cc-pVDZ   | 0.995 | 0.1024 | 6.55e-02 | 9.868 | 3.82e-03 | -248.223463 | 0.089298 | -248.134165 |
| cc-pVTZ       | 1.001 | 0.1031 | 6.59e-02 | 9.940 | 4.51e-03 | -248.277037 | 0.089541 | -248.187496 |
| aug-cc-pVTZ   | 1.001 | 0.1028 | 6.54e-02 | 9.857 | 4.32e-03 | -248.279786 | 0.089487 | -248.190299 |

Table 12: Molecule: Pyridine

| Level of Theory: M06-2X |       |        |          |        |          |                  |               |                      |
|-------------------------|-------|--------|----------|--------|----------|------------------|---------------|----------------------|
| Basis set               | HOMA  | PDI    | MCI      | AV1245 | FLU      | Energy<br>(a.u.) | ZPE<br>(a.u.) | Energy+ZPE<br>(a.u.) |
| 6-31+G(d)               | 0.995 | 0.1024 | 6.78e-02 | 10.18  | 2.75e-03 | -248.180065      | 0.089812      | -248.090253          |
| 6-31++G(d,p)            | 0.995 | 0.1013 | 6.62e-02 | 9.977  | 2.66e-03 | -248.186270      | 0.089571      | -248.096699          |
| 6-311+G(d)              | 0.999 | 0.1036 | 6.88e-02 | 10.27  | 4.51e-03 | -248.231506      | 0.089551      | -248.141955          |
| 6-311++G(d,p)           | 0.999 | 0.1024 | 6.70e-02 | 10.04  | 4.29e-03 | -248.237941      | 0.089316      | -248.148625          |
| Def2SVP                 | 0.993 | 0.1017 | 6.62e-02 | 10.03  | 2.50e-03 | -247.988567      | 0.089654      | -247.898913          |
| Def2SVPD                | 0.994 | 0.1028 | 6.42e-02 | 9.785  | 2.56e-03 | -247.999628      | 0.089443      | -247.910185          |
| Def2TZVP                | 1.000 | 0.1034 | 6.62e-02 | 9.982  | 4.50e-03 | -248.265660      | 0.089506      | -248.176154          |
| Def2TZVPD               | 1.000 | 0.1032 | 6.58e-02 | 9.916  | 4.44e-03 | -248.266398      | 0.089479      | -248.176919          |
| cc-pVDZ                 | 0.995 | 0.1024 | 6.68e-02 | 10.08  | 3.48e-03 | -248.199250      | 0.089370      | -248.109880          |
| aug-cc-pVDZ             | 0.994 | 0.1026 | 6.51e-02 | 9.837  | 3.72e-03 | -248.211517      | 0.089270      | -248.122247          |
| cc-pVTZ                 | 1.000 | 0.1030 | 6.55e-02 | 9.902  | 4.26e-03 | -248.262435      | 0.089507      | -248.172928          |
| aug-cc-pVTZ             | 1.000 | 0.1029 | 6.49e-02 | 9.821  | 4.16e-03 | -248.265211      | 0.089407      | -248.175804          |

  

| Level of Theory: SOGGA11X |       |        |          |       |          |             |          |             |
|---------------------------|-------|--------|----------|-------|----------|-------------|----------|-------------|
| 6-31+G(d)                 | 0.990 | 0.1010 | 6.52e-02 | 9.902 | 1.75e-03 | -248.221828 | 0.090632 | -248.131196 |
| 6-31++G(d,p)              | 0.990 | 0.0997 | 6.33e-02 | 9.654 | 1.77e-03 | -248.230194 | 0.090365 | -248.139829 |
| 6-311+G(d)                | 0.995 | 0.1023 | 6.65e-02 | 10.02 | 2.91e-03 | -248.264975 | 0.090111 | -248.174864 |
| 6-311++G(d,p)             | 0.996 | 0.1009 | 6.45e-02 | 9.757 | 2.77e-03 | -248.273222 | 0.089913 | -248.183309 |
| Def2SVP                   | 0.987 | 0.1001 | 6.37e-02 | 9.738 | 1.93e-03 | -248.030670 | 0.090430 | -247.940240 |
| Def2SVPD                  | 0.988 | 0.1009 | 6.19e-02 | 9.502 | 1.85e-03 | -248.039505 | 0.090098 | -247.949407 |
| Def2TZVP                  | 0.999 | 0.1020 | 6.35e-02 | 9.686 | 2.73e-03 | -248.300093 | 0.090220 | -248.209873 |
| Def2TZVPD                 | 0.999 | 0.1016 | 6.30e-02 | 9.606 | 2.69e-03 | -248.300891 | 0.090224 | -248.210667 |
| cc-pVDZ                   | 0.990 | 0.1008 | 6.41e-02 | 9.760 | 2.55e-03 | -248.236484 | 0.090199 | -248.146285 |
| aug-cc-pVDZ               | 0.988 | 0.1007 | 6.24e-02 | 9.518 | 2.51e-03 | -248.246368 | 0.089973 | -248.156395 |
| cc-pVTZ                   | 0.999 | 0.1015 | 6.28e-02 | 9.604 | 2.66e-03 | -248.291498 | 0.090159 | -248.201339 |
| aug-cc-pVTZ               | 0.999 | 0.1013 | 6.22e-02 | 9.510 | 2.51e-03 | -248.294603 | 0.090073 | -248.204530 |

Table 13: Molecule: Pyridine

| Level of Theory: M11  |       |        |          |        |          |                  |               |                      |
|-----------------------|-------|--------|----------|--------|----------|------------------|---------------|----------------------|
| Basis set             | HOMA  | PDI    | MCI      | AV1245 | FLU      | Energy<br>(a.u.) | ZPE<br>(a.u.) | Energy+ZPE<br>(a.u.) |
| 6-31+G(d)             | 0.996 | 0.1029 | 6.88e-02 | 10.29  | 3.37e-03 | -248.134960      | 0.089214      | -248.045746          |
| 6-31++G(d,p)          | 0.996 | 0.1020 | 6.74e-02 | 10.11  | 3.23e-03 | -248.141012      | 0.088992      | -248.052020          |
| 6-311+G(d)            | 0.999 | 0.1043 | 7.00e-02 | 10.41  | 5.95e-03 | -248.185737      | 0.088688      | -248.097049          |
| 6-311++G(d,p)         | 0.999 | 0.1032 | 6.84e-02 | 10.20  | 5.67e-03 | -248.192112      | 0.088555      | -248.103557          |
| Def2SVP               | 0.993 | 0.1024 | 6.75e-02 | 10.19  | 2.82e-03 | -247.936181      | 0.088957      | -247.847224          |
| Def2SVPD              | 0.994 | 0.1034 | 6.62e-02 | 10.03  | 3.04e-03 | -247.947610      | 0.088703      | -247.858907          |
| Def2TZVP              | 1.002 | 0.1042 | 6.81e-02 | 10.19  | 6.19e-03 | -248.227139      | 0.089106      | -248.138033          |
| Def2TZVPD             | 1.001 | 0.1040 | 6.77e-02 | 10.14  | 6.04e-03 | -248.228777      | 0.088998      | -248.139779          |
| cc-pVDZ               | 0.994 | 0.1029 | 6.79e-02 | 10.21  | 3.82e-03 | -248.142678      | 0.088680      | -248.053998          |
| aug-cc-pVDZ           | 0.995 | 0.1032 | 6.68e-02 | 10.05  | 4.35e-03 | -248.155263      | 0.088542      | -248.066721          |
| cc-pVTZ               | 1.003 | 0.1035 | 6.69e-02 | 10.06  | 5.76e-03 | -248.226584      | 0.089316      | -248.137268          |
| aug-cc-pVTZ           | 1.003 | 0.1033 | 6.66e-02 | 10.00  | 5.64e-03 | -248.231697      | 0.089006      | -248.142691          |
| Level of Theory: MN15 |       |        |          |        |          |                  |               |                      |
| 6-31+G(d)             | 0.990 | 0.1036 | 6.87e-02 | 10.28  | 3.22e-03 | -247.986874      | 0.089356      | -247.897518          |
| 6-31++G(d,p)          | 0.990 | 0.1026 | 6.73e-02 | 10.08  | 3.11e-03 | -247.992735      | 0.089139      | -247.903596          |
| 6-311+G(d)            | 0.998 | 0.1049 | 6.94e-02 | 10.33  | 5.29e-03 | -248.026645      | 0.089001      | -247.937644          |
| 6-311++G(d,p)         | 0.998 | 0.1037 | 6.77e-02 | 10.10  | 5.01e-03 | -248.033390      | 0.088871      | -247.944519          |
| Def2SVP               | 0.989 | 0.1029 | 6.72e-02 | 10.13  | 2.85e-03 | -247.762762      | 0.089467      | -247.673295          |
| Def2SVPD              | 0.990 | 0.1043 | 6.50e-02 | 9.845  | 3.01e-03 | -247.778580      | 0.089358      | -247.689222          |
| Def2TZVP              | 1.000 | 0.1053 | 6.69e-02 | 10.04  | 5.62e-03 | -248.062328      | 0.089117      | -247.973211          |
| Def2TZVPD             | 1.000 | 0.1051 | 6.66e-02 | 9.981  | 5.56e-03 | -248.063583      | 0.088997      | -247.974586          |
| cc-pVDZ               | 0.990 | 0.1037 | 6.76e-02 | 10.16  | 3.94e-03 | -247.988216      | 0.089086      | -247.899130          |
| aug-cc-pVDZ           | 0.989 | 0.1042 | 6.57e-02 | 9.878  | 4.37e-03 | -248.004811      | 0.088853      | -247.915958          |
| cc-pVTZ               | 1.000 | 0.1050 | 6.63e-02 | 9.990  | 5.14e-03 | -248.056754      | 0.089073      | -247.967681          |
| aug-cc-pVTZ           | 1.000 | 0.1051 | 6.57e-02 | 9.902  | 4.97e-03 | -248.062281      | 0.088978      | -247.973303          |

## A.2.2 CCSD

Table 14: Molecule: Pyridine

| Basis set     | HOMA  | PDI    | MCI      | AV1245 | FLU      | Energy<br>(a.u.) | ZPE<br>(a.u.) | Energy+ZPE<br>(a.u.) |
|---------------|-------|--------|----------|--------|----------|------------------|---------------|----------------------|
| 6-31+G(d)     | 0.982 | 0.0597 | 4.52e-02 | 7.159  | 2.73e-02 | -247.527516      | 0.088744      | -247.438772          |
| 6-31++G(d,p)  | 0.983 | 0.0587 | 4.38e-02 | 6.967  | 2.95e-02 | -247.567324      | 0.088828      | -247.478496          |
| 6-311+G(d)    | 0.980 | 0.0605 | 4.56e-02 | 7.218  | 2.64e-02 | -247.599571      | 0.088032      | -247.511539          |
| 6-311++G(d,p) | 0.979 | 0.0595 | 4.43e-02 | 7.027  | 2.85e-02 | -247.636356      | 0.087800      | -247.548556          |
| Def2SVP       | 0.977 | 0.0587 | 4.40e-02 | 7.025  | 2.91e-02 | -247.350720      | 0.089581      | -247.261139          |
| Def2SVPD      | 0.971 | 0.0594 | 4.23e-02 | 6.811  | 2.97e-02 | -247.390290      | 0.089014      | -247.301276          |
| Def2TZVP      | 0.999 | 0.0612 | 4.37e-02 | 7.020  | 2.63e-02 | -247.770551      | 0.089352      | -247.681199          |
| Def2TZVPD     | 0.999 | 0.0610 | 4.33e-02 | 6.966  | 2.66e-02 | -247.775009      | 0.089235      | -247.685774          |
| cc-pVDZ       | 0.950 | 0.0591 | 4.42e-02 | 7.038  | 2.87e-02 | -247.557630      | 0.089032      | -247.468598          |
| aug-cc-pVDZ   | 0.941 | 0.0592 | 4.26e-02 | 6.821  | 2.92e-02 | -247.593916      | 0.088529      | -247.505387          |
| cc-pVTZ       | 0.999 | 0.0609 | 4.33e-02 | 6.979  | 2.72e-02 | -247.778043      | 0.089556      | -247.688487          |
| aug-cc-pVTZ   | 0.998 | 0.0608 | 4.27e-02 | 6.897  | 2.75e-02 | -                | -             | -                    |

## A.2.3 CASSCF(8,8)

Table 15: Molecule: Pyridine

| Basis set  | HOMA  | PDI    | MCI      | AV1245 | FLU      | Energy<br>(a.u.) | ZPE<br>(a.u.) | Energy+ZPE<br>(a.u.) |
|------------|-------|--------|----------|--------|----------|------------------|---------------|----------------------|
| 6-31+G(d)  | 0.990 | 0.0988 | 6.22e-02 | 9.698  | 9.18e-04 | -246.800885      | 0.092623      | -246.708262          |
| 6-311+G(d) | 0.997 | 0.0994 | 6.18e-02 | 9.592  | 1.27e-03 | -246.819317      | 0.086129      | -246.733188          |
| Def2SVP    | 0.982 | 0.0977 | 6.20e-02 | 9.623  | 1.98e-03 | -246.617886      | 0.092658      | -246.525228          |
| Def2TZVP   | 1.002 | 0.0988 | 5.85e-02 | 9.232  | 1.29e-03 | -246.859006      | 0.087685      | -246.771321          |
| cc-pVDZ    | 0.996 | 0.0977 | 5.92e-02 | 9.303  | 1.55e-03 | -246.788726      | 0.090492      | -246.698234          |
| cc-pVTZ    | 1.002 | 0.0985 | 5.81e-02 | 9.198  | 1.41e-03 | -246.852624      | 0.092328      | -246.760296          |

## A.2.4 MP2

Table 16: Molecule: Pyridine

| Basis set     | HOMA  | PDI    | MCI      | AV1245 | FLU      | Energy<br>(a.u.) | ZPE<br>(a.u.) | Energy+ZPE<br>(a.u.) |
|---------------|-------|--------|----------|--------|----------|------------------|---------------|----------------------|
| 6-31+G(d)     | 0.980 | 0.0611 | 4.73e-02 | 7.379  | 2.39e-02 | -247.498389      | 0.088698      | -247.409691          |
| 6-31++G(d,p)  | 0.982 | 0.0601 | 4.58e-02 | 7.182  | 2.59e-02 | -247.537474      | 0.088253      | -247.449221          |
| 6-311+G(d)    | 0.978 | 0.0617 | 4.74e-02 | 7.399  | 2.31e-02 | -247.573326      | 0.087932      | -247.485394          |
| 6-311++G(d,p) | 0.978 | 0.0607 | 4.60e-02 | 7.200  | 2.50e-02 | -247.609267      | 0.087155      | -247.522112          |
| Def2SVP       | 0.978 | 0.0603 | 4.63e-02 | 7.277  | 2.55e-02 | -247.316620      | 0.089532      | -247.227088          |
| Def2SVPD      | 0.969 | 0.0607 | 4.37e-02 | 6.942  | 2.64e-02 | -247.360523      | 0.088978      | -247.271545          |
| Def2TZVP      | 0.997 | 0.0616 | 4.46e-02 | 7.071  | 2.38e-02 | -247.749979      | 0.089004      | -247.660975          |
| Def2TZVPD     | 0.996 | 0.0613 | 4.41e-02 | 6.990  | 2.41e-02 | -247.755070      | 0.088879      | -247.666191          |
| cc-pVDZ       | 0.949 | 0.0606 | 4.63e-02 | 7.259  | 2.52e-02 | -247.524428      | 0.089039      | -247.435389          |
| aug-cc-pVDZ   | 0.935 | 0.0604 | 4.39e-02 | 6.933  | 2.60e-02 | -247.564377      | 0.088453      | -247.475924          |
| cc-pVTZ       | 0.996 | 0.0613 | 4.42e-02 | 7.032  | 2.46e-02 | -247.760122      | 0.089218      | -247.670904          |
| aug-cc-pVTZ   | 0.996 | 0.0611 | 4.34e-02 | 6.906  | 2.51e-02 | -247.777517      | 0.088986      | -247.688531          |



## A.3 Pyridazine

### A.3.1 DFT

Table 17: Molecule: Pyridazine

---

---

Level of Theory: LSDA

---

| Basis set     | HOMA  | PDI    | MCI      | AV1245 | FLU      | Energy<br>(a.u.) | ZPE<br>(a.u.) | Energy+ZPE<br>(a.u.) |
|---------------|-------|--------|----------|--------|----------|------------------|---------------|----------------------|
| 6-31+G(d)     | 0.992 | 0.1083 | 7.19e-02 | 10.08  | 7.65e-03 | -262.824970      | 0.074602      | -262.750368          |
| 6-31++G(d,p)  | 0.992 | 0.1076 | 7.10e-02 | 9.966  | 7.38e-03 | -262.830041      | 0.074369      | -262.755672          |
| 6-311+G(d)    | 0.993 | 0.1095 | 7.31e-02 | 10.18  | 1.05e-02 | -262.877345      | 0.074177      | -262.803168          |
| 6-311++G(d,p) | 0.993 | 0.1087 | 7.17e-02 | 10.03  | 9.89e-03 | -262.883743      | 0.073940      | -262.809803          |
| Def2SVP       | 0.995 | 0.1079 | 7.12e-02 | 10.07  | 6.92e-03 | -262.621723      | 0.074615      | -262.547108          |
| Def2SVPD      | 0.996 | 0.1097 | 6.87e-02 | 9.738  | 6.73e-03 | -262.641073      | 0.074554      | -262.566519          |
| Def2TZVP      | 0.997 | 0.1104 | 7.06e-02 | 9.930  | 1.03e-02 | -262.915968      | 0.074384      | -262.841584          |
| Def2TZVPD     | 0.998 | 0.1104 | 7.01e-02 | 9.853  | 1.01e-02 | -262.917505      | 0.074336      | -262.843169          |
| cc-pVDZ       | 0.993 | 0.1089 | 7.19e-02 | 10.14  | 8.61e-03 | -262.821376      | 0.074252      | -262.747124          |
| aug-cc-pVDZ   | 0.993 | 0.1098 | 6.98e-02 | 9.826  | 8.75e-03 | -262.839199      | 0.074246      | -262.764953          |
| cc-pVTZ       | 0.996 | 0.1101 | 6.99e-02 | 9.876  | 9.65e-03 | -262.912172      | 0.074341      | -262.837831          |
| aug-cc-pVTZ   | 0.996 | 0.1101 | 6.93e-02 | 9.763  | 9.37e-03 | -262.915568      | 0.074257      | -262.841311          |

---

---

Level of Theory: PBE

---

|               |       |        |          |       |          |             |          |             |
|---------------|-------|--------|----------|-------|----------|-------------|----------|-------------|
| 6-31+G(d)     | 0.943 | 0.1071 | 7.25e-02 | 10.13 | 8.32e-03 | -263.980813 | 0.073968 | -263.906845 |
| 6-31++G(d,p)  | 0.944 | 0.1063 | 7.13e-02 | 9.992 | 8.00e-03 | -263.986491 | 0.073778 | -263.912713 |
| 6-311+G(d)    | 0.961 | 0.1081 | 7.35e-02 | 10.22 | 1.07e-02 | -264.029838 | 0.073577 | -263.956261 |
| 6-311++G(d,p) | 0.961 | 0.1072 | 7.20e-02 | 10.04 | 1.01e-02 | -264.036374 | 0.073368 | -263.963006 |
| Def2SVP       | 0.953 | 0.1065 | 7.16e-02 | 10.11 | 7.62e-03 | -263.775347 | 0.073982 | -263.701365 |
| Def2SVPD      | 0.957 | 0.1079 | 6.92e-02 | 9.771 | 7.14e-03 | -263.791338 | 0.073903 | -263.717435 |
| Def2TZVP      | 0.974 | 0.1087 | 7.08e-02 | 9.936 | 1.03e-02 | -264.065304 | 0.073700 | -263.991604 |
| Def2TZVPD     | 0.974 | 0.1085 | 7.03e-02 | 9.848 | 1.01e-02 | -264.066806 | 0.073705 | -263.993101 |
| cc-pVDZ       | 0.944 | 0.1075 | 7.22e-02 | 10.16 | 9.54e-03 | -263.987451 | 0.073675 | -263.913776 |
| aug-cc-pVDZ   | 0.944 | 0.1079 | 7.01e-02 | 9.836 | 9.23e-03 | -264.005033 | 0.073607 | -263.931426 |
| cc-pVTZ       | 0.972 | 0.1084 | 7.03e-02 | 9.897 | 9.83e-03 | -264.057378 | 0.073687 | -263.983691 |
| aug-cc-pVTZ   | 0.973 | 0.1082 | 6.95e-02 | 9.762 | 9.46e-03 | -264.061513 | 0.073652 | -263.987861 |

---

---

Table 18: Molecule: Pyridazine

| Level of Theory: PBE0  |       |        |          |        |          |                  |               |                      |
|------------------------|-------|--------|----------|--------|----------|------------------|---------------|----------------------|
| Basis set              | HOMA  | PDI    | MCI      | AV1245 | FLU      | Energy<br>(a.u.) | ZPE<br>(a.u.) | Energy+ZPE<br>(a.u.) |
| 6-31+G(d)              | 0.989 | 0.1048 | 6.80e-02 | 9.695  | 5.37e-03 | -263.989051      | 0.077025      | -263.912026          |
| 6-31++G(d,p)           | 0.989 | 0.1040 | 6.68e-02 | 9.548  | 5.15e-03 | -263.994927      | 0.076798      | -263.918129          |
| 6-311+G(d)             | 0.991 | 0.1059 | 6.97e-02 | 9.844  | 7.62e-03 | -264.036360      | 0.076593      | -263.959767          |
| 6-311++G(d,p)          | 0.991 | 0.1049 | 6.82e-02 | 9.673  | 7.15e-03 | -264.042926      | 0.076344      | -263.966582          |
| Def2SVP                | 0.991 | 0.1042 | 6.74e-02 | 9.679  | 5.21e-03 | -263.784824      | 0.076974      | -263.707850          |
| Def2SVPD               | 0.991 | 0.1054 | 6.53e-02 | 9.387  | 4.92e-03 | -263.798420      | 0.076774      | -263.721646          |
| Def2TZVP               | 0.992 | 0.1063 | 6.70e-02 | 9.553  | 7.25e-03 | -264.073649      | 0.076619      | -263.997030          |
| Def2TZVPD              | 0.993 | 0.1061 | 6.65e-02 | 9.482  | 7.10e-03 | -264.074772      | 0.076625      | -263.998147          |
| cc-pVDZ                | 0.990 | 0.1050 | 6.78e-02 | 9.709  | 6.32e-03 | -263.999881      | 0.076683      | -263.923198          |
| aug-cc-pVDZ            | 0.989 | 0.1054 | 6.60e-02 | 9.433  | 6.17e-03 | -264.014647      | 0.076532      | -263.938115          |
| cc-pVTZ                | 0.992 | 0.1060 | 6.64e-02 | 9.513  | 6.98e-03 | -264.065901      | 0.076615      | -263.989286          |
| aug-cc-pVTZ            | 0.992 | 0.1059 | 6.58e-02 | 9.399  | 6.73e-03 | -264.069228      | 0.076562      | -263.992666          |
| Level of Theory: B3LYP |       |        |          |        |          |                  |               |                      |
| 6-31+G(d)              | 0.973 | 0.1047 | 6.91e-02 | 9.787  | 6.43e-03 | -264.298913      | 0.076247      | -264.222666          |
| 6-31++G(d,p)           | 0.974 | 0.1039 | 6.79e-02 | 9.641  | 6.17e-03 | -264.304957      | 0.076046      | -264.228911          |
| 6-311+G(d)             | 0.981 | 0.1058 | 7.06e-02 | 9.919  | 9.13e-03 | -264.350658      | 0.075836      | -264.274822          |
| 6-311++G(d,p)          | 0.982 | 0.1048 | 6.91e-02 | 9.744  | 8.59e-03 | -264.357210      | 0.075618      | -264.281592          |
| Def2SVP                | 0.979 | 0.1041 | 6.85e-02 | 9.789  | 5.89e-03 | -264.091312      | 0.076218      | -264.015094          |
| Def2SVPD               | 0.981 | 0.1053 | 6.61e-02 | 9.453  | 5.64e-03 | -264.107171      | 0.076159      | -264.031012          |
| Def2TZVP               | 0.986 | 0.1061 | 6.80e-02 | 9.645  | 8.74e-03 | -264.387702      | 0.076043      | -264.311659          |
| Def2TZVPD              | 0.987 | 0.1059 | 6.75e-02 | 9.568  | 8.55e-03 | -264.388950      | 0.076048      | -264.312902          |
| cc-pVDZ                | 0.974 | 0.1050 | 6.92e-02 | 9.848  | 7.36e-03 | -264.303977      | 0.075893      | -264.228084          |
| aug-cc-pVDZ            | 0.973 | 0.1053 | 6.72e-02 | 9.535  | 7.41e-03 | -264.321306      | 0.075838      | -264.245468          |
| cc-pVTZ                | 0.985 | 0.1058 | 6.73e-02 | 9.592  | 8.32e-03 | -264.380367      | 0.076043      | -264.304324          |
| aug-cc-pVTZ            | 0.986 | 0.1055 | 6.66e-02 | 9.467  | 8.01e-03 | -264.384047      | 0.075999      | -264.308048          |

Table 19: Molecule: Pyridazine

| Level of Theory: CAM-B3LYP |       |        |          |        |          |                  |               |                      |
|----------------------------|-------|--------|----------|--------|----------|------------------|---------------|----------------------|
| Basis set                  | HOMA  | PDI    | MCI      | AV1245 | FLU      | Energy<br>(a.u.) | ZPE<br>(a.u.) | Energy+ZPE<br>(a.u.) |
| 6-31+G(d)                  | 0.985 | 0.1039 | 6.77e-02 | 9.660  | 6.14e-03 | -264.158803      | 0.077405      | -264.081398          |
| 6-31++G(d,p)               | 0.986 | 0.1031 | 6.66e-02 | 9.520  | 5.89e-03 | -264.164677      | 0.077185      | -264.087492          |
| 6-311+G(d)                 | 0.985 | 0.1050 | 6.94e-02 | 9.809  | 9.03e-03 | -264.211453      | 0.076987      | -264.134466          |
| 6-311++G(d,p)              | 0.986 | 0.1041 | 6.80e-02 | 9.647  | 8.48e-03 | -264.217754      | 0.076750      | -264.141004          |
| Def2SVP                    | 0.987 | 0.1035 | 6.73e-02 | 9.688  | 5.73e-03 | -263.951673      | 0.077297      | -263.874376          |
| Def2SVPD                   | 0.988 | 0.1045 | 6.50e-02 | 9.370  | 5.56e-03 | -263.968036      | 0.077202      | -263.890834          |
| Def2TZVP                   | 0.989 | 0.1053 | 6.69e-02 | 9.552  | 8.62e-03 | -264.249110      | 0.077130      | -264.171980          |
| Def2TZVPD                  | 0.990 | 0.1051 | 6.65e-02 | 9.490  | 8.42e-03 | -264.250358      | 0.077112      | -264.173246          |
| cc-pVDZ                    | 0.987 | 0.1042 | 6.78e-02 | 9.725  | 6.81e-03 | -264.163347      | 0.077004      | -264.086343          |
| aug-cc-pVDZ                | 0.986 | 0.1045 | 6.60e-02 | 9.438  | 6.98e-03 | -264.181104      | 0.076940      | -264.104164          |
| cc-pVTZ                    | 0.989 | 0.1050 | 6.63e-02 | 9.508  | 8.25e-03 | -264.241626      | 0.077126      | -264.164500          |
| aug-cc-pVTZ                | 0.989 | 0.1047 | 6.56e-02 | 9.394  | 7.96e-03 | -264.245394      | 0.077066      | -264.168328          |
| Level of Theory: wB97XD    |       |        |          |        |          |                  |               |                      |
| 6-31+G(d)                  | 0.985 | 0.1040 | 6.78e-02 | 9.677  | 5.78e-03 | -264.201434      | 0.077294      | -264.124140          |
| 6-31++G(d,p)               | 0.985 | 0.1032 | 6.66e-02 | 9.537  | 5.55e-03 | -264.207019      | 0.077082      | -264.129937          |
| 6-311+G(d)                 | 0.986 | 0.1051 | 6.95e-02 | 9.834  | 8.39e-03 | -264.250209      | 0.076807      | -264.173402          |
| 6-311++G(d,p)              | 0.987 | 0.1042 | 6.81e-02 | 9.673  | 7.90e-03 | -264.256407      | 0.076604      | -264.179803          |
| Def2SVP                    | 0.987 | 0.1035 | 6.71e-02 | 9.657  | 5.57e-03 | -263.996528      | 0.077186      | -263.919342          |
| Def2SVPD                   | 0.988 | 0.1046 | 6.51e-02 | 9.393  | 5.36e-03 | -264.009859      | 0.077011      | -263.932848          |
| Def2TZVP                   | 0.988 | 0.1053 | 6.71e-02 | 9.580  | 8.04e-03 | -264.287160      | 0.076970      | -264.210190          |
| Def2TZVPD                  | 0.989 | 0.1051 | 6.68e-02 | 9.529  | 7.88e-03 | -264.288213      | 0.076949      | -264.211264          |
| cc-pVDZ                    | 0.985 | 0.1042 | 6.76e-02 | 9.697  | 6.71e-03 | -264.210810      | 0.076890      | -264.133920          |
| aug-cc-pVDZ                | 0.985 | 0.1045 | 6.61e-02 | 9.454  | 6.68e-03 | -264.225121      | 0.076771      | -264.148350          |
| cc-pVTZ                    | 0.988 | 0.1050 | 6.65e-02 | 9.529  | 7.73e-03 | -264.279217      | 0.076965      | -264.202252          |
| aug-cc-pVTZ                | 0.988 | 0.1048 | 6.59e-02 | 9.437  | 7.47e-03 | -264.282553      | 0.076892      | -264.205661          |

Table 20: Molecule: Pyridazine

| Level of Theory: M06-2X   |       |        |          |        |          |                  |               |                      |
|---------------------------|-------|--------|----------|--------|----------|------------------|---------------|----------------------|
| Basis set                 | HOMA  | PDI    | MCI      | AV1245 | FLU      | Energy<br>(a.u.) | ZPE<br>(a.u.) | Energy+ZPE<br>(a.u.) |
| 6-31+G(d)                 | 0.985 | 0.1039 | 6.73e-02 | 9.678  | 5.67e-03 | -264.180738      | 0.077222      | -264.103516          |
| 6-31++G(d,p)              | 0.985 | 0.1031 | 6.62e-02 | 9.536  | 5.46e-03 | -264.185702      | 0.076970      | -264.108732          |
| 6-311+G(d)                | 0.986 | 0.1049 | 6.89e-02 | 9.816  | 7.98e-03 | -264.236648      | 0.076918      | -264.159730          |
| 6-311++G(d,p)             | 0.986 | 0.1041 | 6.76e-02 | 9.664  | 7.56e-03 | -264.241759      | 0.076616      | -264.165143          |
| Def2SVP                   | 0.986 | 0.1033 | 6.65e-02 | 9.642  | 5.31e-03 | -263.972457      | 0.077212      | -263.895245          |
| Def2SVPD                  | 0.987 | 0.1047 | 6.45e-02 | 9.373  | 5.06e-03 | -263.986269      | 0.077031      | -263.909238          |
| Def2TZVP                  | 0.987 | 0.1049 | 6.64e-02 | 9.544  | 7.66e-03 | -264.272392      | 0.076963      | -264.195429          |
| Def2TZVPD                 | 0.988 | 0.1049 | 6.60e-02 | 9.487  | 7.51e-03 | -264.273395      | 0.076947      | -264.196448          |
| cc-pVDZ                   | 0.986 | 0.1041 | 6.72e-02 | 9.704  | 6.39e-03 | -264.202226      | 0.076869      | -264.125357          |
| aug-cc-pVDZ               | 0.985 | 0.1046 | 6.55e-02 | 9.455  | 6.36e-03 | -264.217266      | 0.076780      | -264.140486          |
| cc-pVTZ                   | 0.987 | 0.1047 | 6.58e-02 | 9.488  | 7.39e-03 | -264.268161      | 0.076966      | -264.191195          |
| aug-cc-pVTZ               | 0.987 | 0.1047 | 6.52e-02 | 9.401  | 7.27e-03 | -264.271514      | 0.076841      | -264.194673          |
| Level of Theory: SOGGA11X |       |        |          |        |          |                  |               |                      |
| 6-31+G(d)                 | 0.984 | 0.1029 | 6.49e-02 | 9.370  | 4.27e-03 | -264.215216      | 0.077953      | -264.137263          |
| 6-31++G(d,p)              | 0.984 | 0.1019 | 6.35e-02 | 9.200  | 4.16e-03 | -264.221873      | 0.077688      | -264.144185          |
| 6-311+G(d)                | 0.987 | 0.1039 | 6.68e-02 | 9.546  | 5.82e-03 | -264.263120      | 0.077459      | -264.185661          |
| 6-311++G(d,p)             | 0.988 | 0.1029 | 6.53e-02 | 9.373  | 5.47e-03 | -264.269612      | 0.077188      | -264.192424          |
| Def2SVP                   | 0.985 | 0.1023 | 6.45e-02 | 9.373  | 4.41e-03 | -264.005163      | 0.077897      | -263.927266          |
| Def2SVPD                  | 0.986 | 0.1033 | 6.24e-02 | 9.092  | 4.09e-03 | -264.017043      | 0.077629      | -263.939414          |
| Def2TZVP                  | 0.990 | 0.1039 | 6.39e-02 | 9.235  | 5.39e-03 | -264.299585      | 0.077597      | -264.221988          |
| Def2TZVPD                 | 0.990 | 0.1037 | 6.35e-02 | 9.172  | 5.28e-03 | -264.300569      | 0.077607      | -264.222962          |
| cc-pVDZ                   | 0.985 | 0.1030 | 6.48e-02 | 9.390  | 5.17e-03 | -264.230550      | 0.077607      | -264.152943          |
| aug-cc-pVDZ               | 0.985 | 0.1032 | 6.31e-02 | 9.121  | 4.77e-03 | -264.243598      | 0.077400      | -264.166198          |
| cc-pVTZ                   | 0.989 | 0.1036 | 6.32e-02 | 9.174  | 5.36e-03 | -264.289415      | 0.077564      | -264.211851          |
| aug-cc-pVTZ               | 0.989 | 0.1035 | 6.26e-02 | 9.072  | 5.15e-03 | -264.292967      | 0.077445      | -264.215522          |

Table 21: Molecule: Pyridazine

| Level of Theory: M11  |       |        |          |        |          |                  |               |                      |
|-----------------------|-------|--------|----------|--------|----------|------------------|---------------|----------------------|
| Basis set             | HOMA  | PDI    | MCI      | AV1245 | FLU      | Energy<br>(a.u.) | ZPE<br>(a.u.) | Energy+ZPE<br>(a.u.) |
| 6-31+G(d)             | 0.985 | 0.1040 | 6.80e-02 | 9.731  | 6.49e-03 | -264.141422      | 0.076811      | -264.064611          |
| 6-31++G(d,p)          | 0.985 | 0.1033 | 6.70e-02 | 9.613  | 6.26e-03 | -264.146164      | 0.076567      | -264.069597          |
| 6-311+G(d)            | 0.985 | 0.1052 | 6.99e-02 | 9.924  | 9.67e-03 | -264.197422      | 0.076308      | -264.121114          |
| 6-311++G(d,p)         | 0.986 | 0.1044 | 6.87e-02 | 9.789  | 9.24e-03 | -264.202466      | 0.076092      | -264.126374          |
| Def2SVP               | 0.985 | 0.1035 | 6.74e-02 | 9.740  | 5.90e-03 | -263.925521      | 0.076687      | -263.848834          |
| Def2SVPD              | 0.985 | 0.1047 | 6.57e-02 | 9.512  | 5.92e-03 | -263.939764      | 0.076421      | -263.863343          |
| Def2TZVP              | 0.989 | 0.1054 | 6.81e-02 | 9.739  | 9.48e-03 | -264.240987      | 0.076749      | -264.164238          |
| Def2TZVPD             | 0.990 | 0.1053 | 6.77e-02 | 9.683  | 9.31e-03 | -264.243110      | 0.076661      | -264.166449          |
| cc-pVDZ               | 0.985 | 0.1042 | 6.78e-02 | 9.781  | 6.85e-03 | -264.150399      | 0.076364      | -264.074035          |
| aug-cc-pVDZ           | 0.985 | 0.1047 | 6.66e-02 | 9.576  | 7.36e-03 | -264.166011      | 0.076270      | -264.089741          |
| cc-pVTZ               | 0.990 | 0.1050 | 6.72e-02 | 9.659  | 8.99e-03 | -264.239150      | 0.076889      | -264.162261          |
| aug-cc-pVTZ           | 0.989 | 0.1048 | 6.68e-02 | 9.590  | 9.02e-03 | -264.244818      | 0.076510      | -264.168308          |
| Level of Theory: MN15 |       |        |          |        |          |                  |               |                      |
| 6-31+G(d)             | 0.980 | 0.1050 | 6.86e-02 | 9.781  | 6.09e-03 | -263.979809      | 0.076844      | -263.902965          |
| 6-31++G(d,p)          | 0.981 | 0.1043 | 6.75e-02 | 9.655  | 5.86e-03 | -263.984454      | 0.076612      | -263.907842          |
| 6-311+G(d)            | 0.986 | 0.1062 | 7.00e-02 | 9.906  | 8.72e-03 | -264.023671      | 0.076487      | -263.947184          |
| 6-311++G(d,p)         | 0.987 | 0.1053 | 6.87e-02 | 9.759  | 8.21e-03 | -264.028957      | 0.076265      | -263.952692          |
| Def2SVP               | 0.984 | 0.1045 | 6.79e-02 | 9.774  | 5.62e-03 | -263.739481      | 0.077025      | -263.662456          |
| Def2SVPD              | 0.985 | 0.1063 | 6.56e-02 | 9.469  | 5.45e-03 | -263.757440      | 0.076921      | -263.680519          |
| Def2TZVP              | 0.988 | 0.1069 | 6.77e-02 | 9.658  | 8.75e-03 | -264.062223      | 0.076701      | -263.985522          |
| Def2TZVPD             | 0.989 | 0.1069 | 6.73e-02 | 9.611  | 8.56e-03 | -264.063729      | 0.076560      | -263.987169          |
| cc-pVDZ               | 0.982 | 0.1054 | 6.83e-02 | 9.806  | 6.80e-03 | -263.983892      | 0.076611      | -263.907281          |
| aug-cc-pVDZ           | 0.982 | 0.1063 | 6.65e-02 | 9.532  | 6.95e-03 | -264.002947      | 0.076496      | -263.926451          |
| cc-pVTZ               | 0.988 | 0.1067 | 6.70e-02 | 9.616  | 8.25e-03 | -264.054563      | 0.076645      | -263.977918          |
| aug-cc-pVTZ           | 0.988 | 0.1069 | 6.64e-02 | 9.520  | 8.00e-03 | -264.060329      | 0.076569      | -263.983760          |

### A.3.2 CCSD

Table 22: Molecule: Pyridazine

| Basis set     | HOMA  | PDI    | MCI      | AV1245 | FLU      | Energy<br>(a.u.) | ZPE<br>(a.u.) | Energy+ZPE<br>(a.u.) |
|---------------|-------|--------|----------|--------|----------|------------------|---------------|----------------------|
| 6-31+G(d)     | 0.952 | 0.0596 | 4.35e-02 | 6.580  | 3.02e-02 | -263.512723      | 0.076120      | -263.436603          |
| 6-31++G(d,p)  | 0.954 | 0.0589 | 4.25e-02 | 6.456  | 3.18e-02 | -263.544402      | 0.076098      | -263.468304          |
| 6-311+G(d)    | 0.957 | 0.0603 | 4.44e-02 | 6.697  | 2.96e-02 | -263.590645      | 0.075440      | -263.515205          |
| 6-311++G(d,p) | 0.957 | 0.0596 | 4.35e-02 | 6.580  | 3.11e-02 | -263.619667      | 0.074909      | -263.544758          |
| Def2SVP       | 0.962 | 0.0589 | 4.32e-02 | 6.588  | 3.10e-02 | -263.309236      | 0.076940      | -263.232296          |
| Def2SVPD      | 0.955 | 0.0597 | 4.13e-02 | 6.339  | 3.14e-02 | -263.352850      | 0.076363      | -263.276487          |
| Def2TZVP      | 0.974 | 0.0612 | 4.25e-02 | 6.507  | 2.88e-02 | -263.764342      | 0.076678      | -263.687664          |
| Def2TZVPD     | 0.975 | 0.0611 | 4.23e-02 | 6.466  | 2.89e-02 | -263.769185      | 0.076587      | -263.692598          |
| cc-pVDZ       | 0.932 | 0.0593 | 4.34e-02 | 6.617  | 3.12e-02 | -263.536240      | 0.076381      | -263.459859          |
| aug-cc-pVDZ   | 0.923 | 0.0596 | 4.17e-02 | 6.370  | 3.15e-02 | -263.578141      | 0.075888      | -263.502253          |
| cc-pVTZ       | 0.974 | 0.0610 | 4.23e-02 | 6.492  | 2.94e-02 | -263.768528      | 0.076911      | -263.691617          |
| aug-cc-pVTZ   | 0.975 | 0.0611 | 4.17e-02 | 6.402  | 2.95e-02 | -                | -             | -                    |

### A.3.3 CASSCF(8,8)

Table 23: Molecule: Pyridazine

| Basis set  | HOMA  | PDI    | MCI      | AV1245 | FLU      | Energy<br>(a.u.) | ZPE<br>(a.u.) | Energy+ZPE<br>(a.u.) |
|------------|-------|--------|----------|--------|----------|------------------|---------------|----------------------|
| 6-31+G(d)  | 0.808 | 0.0879 | 4.53e-02 | 7.150  | 2.52e-02 | -262.772173      | 0.080729      | -262.691444          |
| 6-311+G(d) | 0.792 | 0.0879 | 4.55e-02 | 7.141  | 3.00e-02 | -262.819832      | 0.080200      | -262.739632          |
| Def2SVP    | 0.822 | 0.0876 | 4.54e-02 | 7.193  | 2.42e-02 | -262.561862      | 0.080535      | -262.481327          |
| Def2TZVP   | 0.805 | 0.0880 | 4.39e-02 | 6.944  | 2.74e-02 | -262.860026      | 0.080074      | -262.779952          |
| cc-pVDZ    | 0.809 | 0.0876 | 4.47e-02 | 7.083  | 2.65e-02 | -262.786325      | 0.080171      | -262.706154          |
| cc-pVTZ    | 0.804 | 0.0878 | 4.36e-02 | 6.926  | 2.75e-02 | -262.852592      | 0.080069      | -262.772523          |

### A.3.4 MP2

Table 24: Molecule: Pyridazine

| Basis set     | HOMA  | PDI    | MCI      | AV1245 | FLU      | Energy<br>(a.u.) | ZPE<br>(a.u.) | Energy+ZPE<br>(a.u.) |
|---------------|-------|--------|----------|--------|----------|------------------|---------------|----------------------|
| 6-31+G(d)     | 0.951 | 0.0597 | 4.56e-02 | 6.634  | 2.64e-02 | -263.490960      | 0.075953      | -263.415007          |
| 6-31++G(d,p)  | 0.952 | 0.0590 | 4.46e-02 | 6.512  | 2.79e-02 | -263.522054      | 0.075400      | -263.446654          |
| 6-311+G(d)    | 0.961 | 0.0602 | 4.62e-02 | 6.713  | 2.60e-02 | -263.572043      | 0.075217      | -263.496826          |
| 6-311++G(d,p) | 0.961 | 0.0594 | 4.52e-02 | 6.597  | 2.74e-02 | -263.600351      | 0.073843      | -263.526508          |
| Def2SVP       | 0.970 | 0.0595 | 4.55e-02 | 6.706  | 2.71e-02 | -263.282129      | 0.076793      | -263.205336          |
| Def2SVPD      | 0.961 | 0.0599 | 4.29e-02 | 6.338  | 2.76e-02 | -263.329867      | 0.076174      | -263.253693          |
| Def2TZVP      | 0.979 | 0.0604 | 4.36e-02 | 6.427  | 2.59e-02 | -263.751883      | 0.076246      | -263.675637          |
| Def2TZVPD     | 0.978 | 0.0603 | 4.32e-02 | 6.355  | 2.60e-02 | -263.757397      | 0.076151      | -263.681246          |
| cc-pVDZ       | 0.935 | 0.0596 | 4.56e-02 | 6.710  | 2.72e-02 | -263.510450      | 0.076279      | -263.434171          |
| aug-cc-pVDZ   | 0.918 | 0.0595 | 4.31e-02 | 6.334  | 2.78e-02 | -263.556218      | 0.075704      | -263.480514          |
| cc-pVTZ       | 0.978 | 0.0602 | 4.33e-02 | 6.413  | 2.66e-02 | -263.758385      | 0.076501      | -263.681884          |
| aug-cc-pVTZ   | 0.976 | 0.0601 | 4.24e-02 | 6.271  | 2.69e-02 | -263.777536      | 0.076090      | -263.701446          |

## A.4 Pyrimidine

### A.4.1 DFT

Table 25: Molecule: Pyrimidine

---

---

Level of Theory: LSDA

---

| Basis set     | HOMA  | PDI    | MCI      | AV1245 | FLU      | Energy<br>(a.u.) | ZPE<br>(a.u.) | Energy+ZPE<br>(a.u.) |
|---------------|-------|--------|----------|--------|----------|------------------|---------------|----------------------|
| 6-31+G(d)     | 1.000 | 0.1042 | 6.79e-02 | 9.854  | 6.27e-03 | -262.860533      | 0.075527      | -262.785006          |
| 6-31++G(d,p)  | 1.000 | 0.1036 | 6.70e-02 | 9.738  | 6.01e-03 | -262.865289      | 0.075326      | -262.789963          |
| 6-311+G(d)    | 1.003 | 0.1061 | 6.95e-02 | 10.06  | 1.08e-02 | -262.914191      | 0.075145      | -262.839046          |
| 6-311++G(d,p) | 1.003 | 0.1052 | 6.82e-02 | 9.877  | 1.02e-02 | -262.920157      | 0.074953      | -262.845204          |
| Def2SVP       | 0.998 | 0.1036 | 6.66e-02 | 9.770  | 5.12e-03 | -262.658939      | 0.075445      | -262.583494          |
| Def2SVPD      | 0.999 | 0.1056 | 6.45e-02 | 9.543  | 5.50e-03 | -262.678876      | 0.075442      | -262.603434          |
| Def2TZVP      | 1.008 | 0.1070 | 6.71e-02 | 9.808  | 1.10e-02 | -262.951153      | 0.075165      | -262.875988          |
| Def2TZVPD     | 1.008 | 0.1069 | 6.67e-02 | 9.751  | 1.08e-02 | -262.952574      | 0.075133      | -262.877441          |
| cc-pVDZ       | 0.999 | 0.1053 | 6.80e-02 | 9.900  | 7.79e-03 | -262.856207      | 0.075098      | -262.781109          |
| aug-cc-pVDZ   | 1.000 | 0.1061 | 6.63e-02 | 9.684  | 8.59e-03 | -262.873985      | 0.075095      | -262.798890          |
| cc-pVTZ       | 1.007 | 0.1065 | 6.63e-02 | 9.735  | 9.92e-03 | -262.947196      | 0.075121      | -262.872075          |
| aug-cc-pVTZ   | 1.007 | 0.1064 | 6.57e-02 | 9.652  | 9.55e-03 | -262.950530      | 0.075073      | -262.875457          |

---

---

Level of Theory: PBE

---

|               |       |        |          |       |          |             |          |             |
|---------------|-------|--------|----------|-------|----------|-------------|----------|-------------|
| 6-31+G(d)     | 0.974 | 0.1031 | 6.87e-02 | 9.887 | 6.62e-03 | -264.014383 | 0.074926 | -263.939457 |
| 6-31++G(d,p)  | 0.974 | 0.1024 | 6.76e-02 | 9.748 | 6.28e-03 | -264.019775 | 0.074753 | -263.945022 |
| 6-311+G(d)    | 0.986 | 0.1047 | 7.00e-02 | 10.04 | 1.04e-02 | -264.064572 | 0.074592 | -263.989980 |
| 6-311++G(d,p) | 0.986 | 0.1038 | 6.86e-02 | 9.865 | 9.75e-03 | -264.070681 | 0.074412 | -263.996269 |
| Def2SVP       | 0.975 | 0.1025 | 6.73e-02 | 9.803 | 5.63e-03 | -263.810184 | 0.074812 | -263.735372 |
| Def2SVPD      | 0.979 | 0.1039 | 6.51e-02 | 9.549 | 5.63e-03 | -263.826816 | 0.074752 | -263.752064 |
| Def2TZVP      | 0.994 | 0.1052 | 6.74e-02 | 9.778 | 1.03e-02 | -264.098641 | 0.074560 | -264.024081 |
| Def2TZVPD     | 0.993 | 0.1050 | 6.69e-02 | 9.711 | 1.01e-02 | -264.100044 | 0.074550 | -264.025494 |
| cc-pVDZ       | 0.973 | 0.1040 | 6.86e-02 | 9.922 | 8.64e-03 | -264.020174 | 0.074547 | -263.945627 |
| aug-cc-pVDZ   | 0.973 | 0.1042 | 6.68e-02 | 9.676 | 8.79e-03 | -264.037614 | 0.074513 | -263.963101 |
| cc-pVTZ       | 0.994 | 0.1048 | 6.68e-02 | 9.723 | 9.44e-03 | -264.090514 | 0.074529 | -264.015985 |
| aug-cc-pVTZ   | 0.993 | 0.1045 | 6.60e-02 | 9.617 | 8.94e-03 | -264.094714 | 0.074503 | -264.020211 |

---

---



Table 26: Molecule: Pyrimidine

| Level of Theory: PBE0  |       |        |          |        |          |                  |               |                      |
|------------------------|-------|--------|----------|--------|----------|------------------|---------------|----------------------|
| Basis set              | HOMA  | PDI    | MCI      | AV1245 | FLU      | Energy<br>(a.u.) | ZPE<br>(a.u.) | Energy+ZPE<br>(a.u.) |
| 6-31+G(d)              | 0.999 | 0.0995 | 6.29e-02 | 9.260  | 2.67e-03 | -264.025395      | 0.077916      | -263.947479          |
| 6-31++G(d,p)           | 0.999 | 0.0987 | 6.18e-02 | 9.115  | 2.53e-03 | -264.031000      | 0.077697      | -263.953303          |
| 6-311+G(d)             | 1.000 | 0.1013 | 6.51e-02 | 9.489  | 5.42e-03 | -264.073861      | 0.077540      | -263.996321          |
| 6-311++G(d,p)          | 1.000 | 0.1004 | 6.37e-02 | 9.318  | 4.98e-03 | -264.080011      | 0.077316      | -264.002695          |
| Def2SVP                | 0.997 | 0.0990 | 6.20e-02 | 9.216  | 2.59e-03 | -263.822423      | 0.077757      | -263.744666          |
| Def2SVPD               | 0.997 | 0.1003 | 6.00e-02 | 8.987  | 2.56e-03 | -263.836647      | 0.077588      | -263.759059          |
| Def2TZVP               | 1.003 | 0.1016 | 6.23e-02 | 9.219  | 5.22e-03 | -264.109687      | 0.077427      | -264.032260          |
| Def2TZVPD              | 1.003 | 0.1014 | 6.19e-02 | 9.165  | 5.12e-03 | -264.110735      | 0.077417      | -264.033318          |
| cc-pVDZ                | 0.999 | 0.1003 | 6.30e-02 | 9.305  | 3.86e-03 | -264.035523      | 0.077503      | -263.958020          |
| aug-cc-pVDZ            | 0.999 | 0.1005 | 6.15e-02 | 9.096  | 4.01e-03 | -264.050107      | 0.077397      | -263.972710          |
| cc-pVTZ                | 1.003 | 0.1012 | 6.17e-02 | 9.162  | 4.78e-03 | -264.101761      | 0.077401      | -264.024360          |
| aug-cc-pVTZ            | 1.003 | 0.1010 | 6.10e-02 | 9.069  | 4.47e-03 | -264.105177      | 0.077373      | -264.027804          |
| Level of Theory: B3LYP |       |        |          |        |          |                  |               |                      |
| 6-31+G(d)              | 0.994 | 0.1000 | 6.49e-02 | 9.466  | 3.69e-03 | -264.335097      | 0.077181      | -264.257916          |
| 6-31++G(d,p)           | 0.994 | 0.0992 | 6.37e-02 | 9.321  | 3.47e-03 | -264.340870      | 0.076997      | -264.263873          |
| 6-311+G(d)             | 0.999 | 0.1018 | 6.68e-02 | 9.676  | 7.22e-03 | -264.387806      | 0.076813      | -264.310993          |
| 6-311++G(d,p)          | 0.999 | 0.1009 | 6.53e-02 | 9.498  | 6.68e-03 | -264.393934      | 0.076621      | -264.317313          |
| Def2SVP                | 0.993 | 0.0996 | 6.38e-02 | 9.413  | 3.12e-03 | -264.128601      | 0.077022      | -264.051579          |
| Def2SVPD               | 0.995 | 0.1007 | 6.16e-02 | 9.154  | 3.25e-03 | -264.145199      | 0.076973      | -264.068226          |
| Def2TZVP               | 1.000 | 0.1020 | 6.42e-02 | 9.417  | 7.13e-03 | -264.423598      | 0.076882      | -264.346716          |
| Def2TZVPD              | 1.000 | 0.1018 | 6.37e-02 | 9.357  | 6.99e-03 | -264.424783      | 0.076874      | -264.347909          |
| cc-pVDZ                | 0.993 | 0.1010 | 6.51e-02 | 9.541  | 5.07e-03 | -264.339078      | 0.076736      | -264.262342          |
| aug-cc-pVDZ            | 0.993 | 0.1011 | 6.35e-02 | 9.305  | 5.54e-03 | -264.356552      | 0.076715      | -264.279837          |
| cc-pVTZ                | 1.000 | 0.1016 | 6.34e-02 | 9.347  | 6.36e-03 | -264.416096      | 0.076863      | -264.339233          |
| aug-cc-pVTZ            | 1.000 | 0.1013 | 6.27e-02 | 9.245  | 5.99e-03 | -264.419871      | 0.076836      | -264.343035          |

Table 27: Molecule: Pyrimidine

| Level of Theory: CAM-B3LYP |       |        |          |        |          |                  |               |                      |
|----------------------------|-------|--------|----------|--------|----------|------------------|---------------|----------------------|
| Basis set                  | HOMA  | PDI    | MCI      | AV1245 | FLU      | Energy<br>(a.u.) | ZPE<br>(a.u.) | Energy+ZPE<br>(a.u.) |
| 6-31+G(d)                  | 1.000 | 0.0989 | 6.33e-02 | 9.274  | 2.91e-03 | -264.196152      | 0.078274      | -264.117878          |
| 6-31++G(d,p)               | 1.000 | 0.0981 | 6.22e-02 | 9.135  | 2.75e-03 | -264.201767      | 0.078066      | -264.123701          |
| 6-311+G(d)                 | 1.002 | 0.1007 | 6.54e-02 | 9.508  | 6.32e-03 | -264.249832      | 0.077888      | -264.171944          |
| 6-311++G(d,p)              | 1.002 | 0.0998 | 6.40e-02 | 9.343  | 5.83e-03 | -264.255737      | 0.077672      | -264.178065          |
| Def2SVP                    | 0.998 | 0.0986 | 6.24e-02 | 9.257  | 2.56e-03 | -263.990083      | 0.078056      | -263.912027          |
| Def2SVPD                   | 0.999 | 0.0996 | 6.03e-02 | 9.005  | 2.69e-03 | -264.007226      | 0.077976      | -263.929250          |
| Def2TZVP                   | 1.007 | 0.1008 | 6.29e-02 | 9.264  | 6.25e-03 | -264.286189      | 0.077900      | -264.208289          |
| Def2TZVPD                  | 1.007 | 0.1006 | 6.25e-02 | 9.216  | 6.12e-03 | -264.287390      | 0.077882      | -264.209508          |
| cc-pVDZ                    | 1.000 | 0.0998 | 6.35e-02 | 9.359  | 3.92e-03 | -264.199691      | 0.077790      | -264.121901          |
| aug-cc-pVDZ                | 1.000 | 0.0998 | 6.21e-02 | 9.142  | 4.45e-03 | -264.217597      | 0.077759      | -264.139838          |
| cc-pVTZ                    | 1.007 | 0.1004 | 6.22e-02 | 9.199  | 5.58e-03 | -264.278565      | 0.077884      | -264.200681          |
| aug-cc-pVTZ                | 1.007 | 0.1001 | 6.15e-02 | 9.106  | 5.26e-03 | -264.282408      | 0.077848      | -264.204560          |
| Level of Theory: wB97XD    |       |        |          |        |          |                  |               |                      |
| 6-31+G(d)                  | 0.999 | 0.0988 | 6.30e-02 | 9.250  | 2.60e-03 | -264.238514      | 0.078157      | -264.160357          |
| 6-31++G(d,p)               | 0.999 | 0.0980 | 6.19e-02 | 9.111  | 2.46e-03 | -264.243842      | 0.077944      | -264.165898          |
| 6-311+G(d)                 | 1.000 | 0.1006 | 6.52e-02 | 9.490  | 5.60e-03 | -264.288354      | 0.077728      | -264.210626          |
| 6-311++G(d,p)              | 1.000 | 0.0997 | 6.38e-02 | 9.326  | 5.15e-03 | -264.294146      | 0.077530      | -264.216616          |
| Def2SVP                    | 0.998 | 0.0984 | 6.20e-02 | 9.194  | 2.46e-03 | -264.034899      | 0.077947      | -263.956952          |
| Def2SVPD                   | 0.998 | 0.0994 | 6.02e-02 | 8.988  | 2.48e-03 | -264.048906      | 0.077804      | -263.971102          |
| Def2TZVP                   | 1.003 | 0.1006 | 6.27e-02 | 9.250  | 5.52e-03 | -264.323898      | 0.077742      | -264.246156          |
| Def2TZVPD                  | 1.003 | 0.1004 | 6.25e-02 | 9.211  | 5.41e-03 | -264.324910      | 0.077728      | -264.247182          |
| cc-pVDZ                    | 0.999 | 0.0995 | 6.31e-02 | 9.296  | 3.76e-03 | -264.247150      | 0.077672      | -264.169478          |
| aug-cc-pVDZ                | 0.999 | 0.0996 | 6.18e-02 | 9.114  | 4.04e-03 | -264.261455      | 0.077602      | -264.183853          |
| cc-pVTZ                    | 1.003 | 0.1002 | 6.20e-02 | 9.184  | 4.98e-03 | -264.315787      | 0.077728      | -264.238059          |
| aug-cc-pVTZ                | 1.003 | 0.1000 | 6.15e-02 | 9.109  | 4.67e-03 | -264.319210      | 0.077699      | -264.241511          |

Table 28: Molecule: Pyrimidine

| Level of Theory: M06-2X   |       |        |          |        |          |                  |               |                      |
|---------------------------|-------|--------|----------|--------|----------|------------------|---------------|----------------------|
| Basis set                 | HOMA  | PDI    | MCI      | AV1245 | FLU      | Energy<br>(a.u.) | ZPE<br>(a.u.) | Energy+ZPE<br>(a.u.) |
| 6-31+G(d)                 | 0.999 | 0.0988 | 6.26e-02 | 9.253  | 2.52e-03 | -264.218719      | 0.078130      | -264.140589          |
| 6-31++G(d,p)              | 0.999 | 0.0981 | 6.16e-02 | 9.112  | 2.41e-03 | -264.223463      | 0.077887      | -264.145576          |
| 6-311+G(d)                | 1.000 | 0.1005 | 6.47e-02 | 9.467  | 4.99e-03 | -264.275985      | 0.077885      | -264.198100          |
| 6-311++G(d,p)             | 1.000 | 0.0997 | 6.34e-02 | 9.310  | 4.63e-03 | -264.280775      | 0.077615      | -264.203160          |
| Def2SVP                   | 0.997 | 0.0984 | 6.15e-02 | 9.188  | 2.34e-03 | -264.011663      | 0.078013      | -263.933650          |
| Def2SVPD                  | 0.997 | 0.0996 | 5.96e-02 | 8.976  | 2.36e-03 | -264.025989      | 0.077855      | -263.948134          |
| Def2TZVP                  | 1.002 | 0.1003 | 6.22e-02 | 9.217  | 4.88e-03 | -264.310270      | 0.077784      | -264.232486          |
| Def2TZVPD                 | 1.002 | 0.1003 | 6.18e-02 | 9.173  | 4.79e-03 | -264.311228      | 0.077768      | -264.233460          |
| cc-pVDZ                   | 0.999 | 0.0996 | 6.28e-02 | 9.308  | 3.47e-03 | -264.239642      | 0.077729      | -264.161913          |
| aug-cc-pVDZ               | 0.999 | 0.0999 | 6.14e-02 | 9.123  | 3.74e-03 | -264.254337      | 0.077669      | -264.176668          |
| cc-pVTZ                   | 1.002 | 0.1000 | 6.14e-02 | 9.137  | 4.45e-03 | -264.306106      | 0.077781      | -264.228325          |
| aug-cc-pVTZ               | 1.002 | 0.0999 | 6.09e-02 | 9.070  | 4.30e-03 | -264.309536      | 0.077736      | -264.231800          |
| Level of Theory: SOGGA11X |       |        |          |        |          |                  |               |                      |
| 6-31+G(d)                 | 0.997 | 0.0965 | 5.89e-02 | 8.775  | 1.65e-03 | -264.252449      | 0.078822      | -264.173627          |
| 6-31++G(d,p)              | 0.997 | 0.0955 | 5.76e-02 | 8.610  | 1.74e-03 | -264.258847      | 0.078555      | -264.180292          |
| 6-311+G(d)                | 0.999 | 0.0983 | 6.13e-02 | 9.030  | 2.74e-03 | -264.301154      | 0.078399      | -264.222755          |
| 6-311++G(d,p)             | 0.999 | 0.0973 | 5.99e-02 | 8.856  | 2.54e-03 | -264.307235      | 0.078150      | -264.229085          |
| Def2SVP                   | 0.995 | 0.0962 | 5.84e-02 | 8.776  | 1.89e-03 | -264.043777      | 0.078713      | -263.965064          |
| Def2SVPD                  | 0.996 | 0.0971 | 5.64e-02 | 8.538  | 1.86e-03 | -264.056015      | 0.078435      | -263.977580          |
| Def2TZVP                  | 1.001 | 0.0980 | 5.83e-02 | 8.741  | 2.55e-03 | -264.336379      | 0.078403      | -264.257976          |
| Def2TZVPD                 | 1.001 | 0.0979 | 5.79e-02 | 8.690  | 2.50e-03 | -264.337306      | 0.078397      | -264.258909          |
| cc-pVDZ                   | 0.997 | 0.0973 | 5.93e-02 | 8.846  | 2.34e-03 | -264.267122      | 0.078448      | -264.188674          |
| aug-cc-pVDZ               | 0.996 | 0.0972 | 5.77e-02 | 8.623  | 2.26e-03 | -264.279807      | 0.078261      | -264.201546          |
| cc-pVTZ                   | 1.000 | 0.0977 | 5.75e-02 | 8.664  | 2.44e-03 | -264.326171      | 0.078344      | -264.247827          |
| aug-cc-pVTZ               | 1.000 | 0.0975 | 5.69e-02 | 8.577  | 2.29e-03 | -264.329883      | 0.078294      | -264.251589          |

Table 29: Molecule: Pyrimidine

Level of Theory: M11

| Basis set     | HOMA  | PDI    | MCI      | AV1245 | FLU      | Energy<br>(a.u.) | ZPE<br>(a.u.) | Energy+ZPE<br>(a.u.) |
|---------------|-------|--------|----------|--------|----------|------------------|---------------|----------------------|
| 6-31+G(d)     | 0.999 | 0.0990 | 6.35e-02 | 9.325  | 3.25e-03 | -264.179130      | 0.077650      | -264.101480          |
| 6-31++G(d,p)  | 0.999 | 0.0983 | 6.26e-02 | 9.207  | 3.08e-03 | -264.183720      | 0.077427      | -264.106293          |
| 6-311+G(d)    | 1.001 | 0.1010 | 6.61e-02 | 9.611  | 7.27e-03 | -264.236162      | 0.077180      | -264.158982          |
| 6-311++G(d,p) | 1.001 | 0.1002 | 6.49e-02 | 9.470  | 6.85e-03 | -264.240940      | 0.076991      | -264.163949          |
| Def2SVP       | 0.997 | 0.0986 | 6.25e-02 | 9.291  | 2.65e-03 | -263.963852      | 0.077452      | -263.886400          |
| Def2SVPD      | 0.997 | 0.0998 | 6.10e-02 | 9.124  | 2.87e-03 | -263.979407      | 0.077325      | -263.902082          |
| Def2TZVP      | 1.005 | 0.1011 | 6.42e-02 | 9.431  | 7.59e-03 | -264.278055      | 0.077441      | -264.200614          |
| Def2TZVPD     | 1.005 | 0.1009 | 6.38e-02 | 9.385  | 7.35e-03 | -264.280158      | 0.077404      | -264.202754          |
| cc-pVDZ       | 0.999 | 0.0997 | 6.36e-02 | 9.385  | 3.94e-03 | -264.187174      | 0.077189      | -264.109985          |
| aug-cc-pVDZ   | 0.999 | 0.1000 | 6.26e-02 | 9.242  | 4.67e-03 | -264.203305      | 0.077112      | -264.126193          |
| cc-pVTZ       | 1.005 | 0.1006 | 6.33e-02 | 9.345  | 6.80e-03 | -264.275760      | 0.077587      | -264.198173          |
| aug-cc-pVTZ   | 1.006 | 0.1005 | 6.29e-02 | 9.297  | 6.60e-03 | -264.281498      | 0.077458      | -264.204040          |

Level of Theory: MN15

|               |       |        |          |       |          |             |          |             |
|---------------|-------|--------|----------|-------|----------|-------------|----------|-------------|
| 6-31+G(d)     | 0.997 | 0.1002 | 6.41e-02 | 9.398 | 3.20e-03 | -264.017536 | 0.077722 | -263.939814 |
| 6-31++G(d,p)  | 0.997 | 0.0996 | 6.31e-02 | 9.274 | 3.05e-03 | -264.021887 | 0.077512 | -263.944375 |
| 6-311+G(d)    | 1.000 | 0.1020 | 6.59e-02 | 9.595 | 6.42e-03 | -264.062545 | 0.077384 | -263.985161 |
| 6-311++G(d,p) | 1.000 | 0.1012 | 6.46e-02 | 9.447 | 5.98e-03 | -264.067452 | 0.077203 | -263.990249 |
| Def2SVP       | 0.996 | 0.0998 | 6.30e-02 | 9.346 | 2.77e-03 | -263.778407 | 0.077780 | -263.700627 |
| Def2SVPD      | 0.997 | 0.1015 | 6.09e-02 | 9.107 | 2.95e-03 | -263.797165 | 0.077735 | -263.719430 |
| Def2TZVP      | 1.001 | 0.1027 | 6.37e-02 | 9.383 | 6.86e-03 | -264.099611 | 0.077434 | -264.022177 |
| Def2TZVPD     | 1.001 | 0.1027 | 6.34e-02 | 9.347 | 6.76e-03 | -264.101025 | 0.077352 | -264.023673 |
| cc-pVDZ       | 0.997 | 0.1011 | 6.41e-02 | 9.437 | 4.30e-03 | -264.020899 | 0.077422 | -263.943477 |
| aug-cc-pVDZ   | 0.997 | 0.1018 | 6.25e-02 | 9.230 | 4.88e-03 | -264.039828 | 0.077360 | -263.962468 |
| cc-pVTZ       | 1.001 | 0.1024 | 6.29e-02 | 9.320 | 5.97e-03 | -264.091791 | 0.077397 | -264.014394 |
| aug-cc-pVTZ   | 1.001 | 0.1024 | 6.23e-02 | 9.245 | 5.70e-03 | -264.097587 | 0.077346 | -264.020241 |

## A.4.2 CCSD

Table 30: Molecule: Pyrimidine

| Basis set     | HOMA  | PDI    | MCI      | AV1245 | FLU      | Energy<br>(a.u.) | ZPE<br>(a.u.) | Energy+ZPE<br>(a.u.) |
|---------------|-------|--------|----------|--------|----------|------------------|---------------|----------------------|
| 6-31+G(d)     | 0.992 | 0.0585 | 4.19e-02 | 6.558  | 2.69e-02 | -263.550122      | 0.077419      | -263.472703          |
| 6-31++G(d,p)  | 0.992 | 0.0578 | 4.10e-02 | 6.421  | 2.90e-02 | -263.581583      | 0.077619      | -263.503964          |
| 6-311+G(d)    | 0.992 | 0.0595 | 4.29e-02 | 6.681  | 2.42e-02 | -263.628527      | 0.076863      | -263.551664          |
| 6-311++G(d,p) | 0.992 | 0.0588 | 4.20e-02 | 6.548  | 2.60e-02 | -263.657524      | 0.076718      | -263.580806          |
| Def2SVP       | 0.992 | 0.0578 | 4.13e-02 | 6.527  | 2.86e-02 | -263.347982      | 0.078029      | -263.269953          |
| Def2SVPD      | 0.989 | 0.0587 | 3.94e-02 | 6.302  | 2.96e-02 | -263.392828      | 0.077696      | -263.315132          |
| Def2TZVP      | 1.000 | 0.0600 | 4.06e-02 | 6.450  | 2.51e-02 | -263.801875      | 0.077698      | -263.724177          |
| Def2TZVPD     | 1.000 | 0.0599 | 4.04e-02 | 6.413  | 2.53e-02 | -263.806607      | 0.077581      | -263.729026          |
| cc-pVDZ       | 0.976 | 0.0585 | 4.21e-02 | 6.590  | 2.55e-02 | -263.573049      | 0.077458      | -263.495591          |
| aug-cc-pVDZ   | 0.970 | 0.0586 | 4.04e-02 | 6.366  | 2.63e-02 | -263.614704      | 0.076991      | -263.537713          |
| cc-pVTZ       | 1.000 | 0.0597 | 4.03e-02 | 6.415  | 2.62e-02 | -263.805947      | 0.077873      | -263.728074          |
| aug-cc-pVTZ   | 1.000 | 0.0597 | 3.97e-02 | 6.331  | 2.68e-02 | -263.822717      | 0.077693      | -263.745024          |

## A.4.3 CASSCF(8,8)

Table 31: Molecule: Pyrimidine

| Basis set  | HOMA  | PDI    | MCI      | AV1245 | FLU      | Energy<br>(a.u.) | ZPE<br>(a.u.) | Energy+ZPE<br>(a.u.) |
|------------|-------|--------|----------|--------|----------|------------------|---------------|----------------------|
| 6-31+G(d)  | 0.987 | 0.0942 | 5.66e-02 | 8.429  | 7.80e-04 | -262.808880      | 0.081356      | -262.727524          |
| 6-311+G(d) | 0.987 | 0.0957 | 5.87e-02 | 8.653  | 4.28e-04 | -262.856996      | 0.080838      | -262.776158          |
| Def2SVP    | 1.000 | 0.0936 | 5.52e-02 | 8.346  | 1.33e-03 | -262.599830      | 0.081354      | -262.518476          |
| Def2TZVP   | 1.002 | 0.0947 | 5.46e-02 | 8.219  | 6.34e-04 | -262.896124      | 0.080934      | -262.815190          |
| cc-pVDZ    | 0.997 | 0.0931 | 5.49e-02 | 8.234  | 1.35e-03 | -262.799905      | 0.081366      | -262.718539          |
| cc-pVTZ    | 1.001 | 0.0934 | 5.31e-02 | 8.036  | 1.34e-03 | -262.866078      | 0.088727      | -262.777351          |

## A.4.4 MP2

Table 32: Molecule: Pyrimidine

| Basis set     | HOMA  | PDI    | MCI      | AV1245 | FLU      | Energy<br>(a.u.) | ZPE<br>(a.u.) | Energy+ZPE<br>(a.u.) |
|---------------|-------|--------|----------|--------|----------|------------------|---------------|----------------------|
| 6-31+G(d)     | 0.988 | 0.0630 | 4.58e-02 | 7.148  | 2.23e-02 | -263.526462      | 0.077349      | -263.449113          |
| 6-31++G(d,p)  | 0.989 | 0.0623 | 4.48e-02 | 7.007  | 2.41e-02 | -263.557230      | 0.077234      | -263.479996          |
| 6-311+G(d)    | 0.991 | 0.0642 | 4.69e-02 | 7.286  | 1.97e-02 | -263.608081      | 0.076772      | -263.531309          |
| 6-311++G(d,p) | 0.991 | 0.0635 | 4.59e-02 | 7.148  | 2.13e-02 | -263.636259      | 0.076299      | -263.559960          |
| Def2SVP       | 0.992 | 0.0623 | 4.52e-02 | 7.114  | 2.40e-02 | -263.319204      | 0.077923      | -263.241281          |
| Def2SVPD      | 0.988 | 0.0632 | 4.28e-02 | 6.831  | 2.50e-02 | -263.368184      | 0.077586      | -263.290598          |
| Def2TZVP      | 0.999 | 0.0640 | 4.38e-02 | 6.952  | 2.09e-02 | -263.787082      | 0.077287      | -263.709795          |
| Def2TZVPD     | 0.999 | 0.0639 | 4.35e-02 | 6.895  | 2.12e-02 | -263.792447      | 0.077160      | -263.715287          |
| cc-pVDZ       | 0.974 | 0.0634 | 4.61e-02 | 7.201  | 2.14e-02 | -263.545240      | 0.077378      | -263.467862          |
| aug-cc-pVDZ   | 0.964 | 0.0633 | 4.39e-02 | 6.914  | 2.22e-02 | -263.590551      | 0.076828      | -263.513723          |
| cc-pVTZ       | 0.999 | 0.0638 | 4.35e-02 | 6.922  | 2.19e-02 | -263.793436      | 0.077475      | -263.715961          |
| aug-cc-pVTZ   | 0.999 | 0.0636 | 4.27e-02 | 6.807  | 2.26e-02 | -263.812582      | 0.077241      | -263.735341          |

## A.5 Pyrazine

### A.5.1 DFT

Table 33: Molecule: Pyrazine

---

---

Level of Theory: LSDA

---

| Basis set     | HOMA  | PDI    | MCI      | AV1245 | FLU      | Energy<br>(a.u.) | ZPE<br>(a.u.) | Energy+ZPE<br>(a.u.) |
|---------------|-------|--------|----------|--------|----------|------------------|---------------|----------------------|
| 6-31+G(d)     | 0.998 | 0.1109 | 6.73e-02 | 11.47  | 1.18e-02 | -262.854290      | 0.075263      | -262.779027          |
| 6-31++G(d,p)  | 0.998 | 0.1102 | 6.64e-02 | 11.32  | 1.15e-02 | -262.859087      | 0.075075      | -262.784012          |
| 6-311+G(d)    | 1.001 | 0.1124 | 6.91e-02 | 11.58  | 1.70e-02 | -262.907897      | 0.074924      | -262.832973          |
| 6-311++G(d,p) | 1.001 | 0.1114 | 6.78e-02 | 11.37  | 1.62e-02 | -262.913898      | 0.074754      | -262.839144          |
| Def2SVP       | 0.993 | 0.1100 | 6.59e-02 | 11.29  | 1.05e-02 | -262.653393      | 0.075271      | -262.578122          |
| Def2SVPD      | 0.993 | 0.1125 | 6.36e-02 | 11.09  | 1.12e-02 | -262.673069      | 0.075316      | -262.597753          |
| Def2TZVP      | 1.005 | 0.1135 | 6.65e-02 | 11.28  | 1.75e-02 | -262.944993      | 0.074966      | -262.870027          |
| Def2TZVPD     | 1.005 | 0.1134 | 6.61e-02 | 11.22  | 1.73e-02 | -262.946480      | 0.074925      | -262.871555          |
| cc-pVDZ       | 0.997 | 0.1114 | 6.72e-02 | 11.36  | 1.32e-02 | -262.850042      | 0.074830      | -262.775212          |
| aug-cc-pVDZ   | 0.997 | 0.1126 | 6.54e-02 | 11.18  | 1.45e-02 | -262.868203      | 0.074944      | -262.793259          |
| cc-pVTZ       | 1.005 | 0.1131 | 6.58e-02 | 11.20  | 1.65e-02 | -262.940956      | 0.074903      | -262.866053          |
| aug-cc-pVTZ   | 1.005 | 0.1132 | 6.51e-02 | 11.14  | 1.61e-02 | -262.944420      | 0.074858      | -262.869562          |

---

---

Level of Theory: PBE

---

|               |       |        |          |       |          |             |          |             |
|---------------|-------|--------|----------|-------|----------|-------------|----------|-------------|
| 6-31+G(d)     | 0.966 | 0.1097 | 6.81e-02 | 11.49 | 1.18e-02 | -264.008353 | 0.074683 | -263.933670 |
| 6-31++G(d,p)  | 0.966 | 0.1088 | 6.70e-02 | 11.31 | 1.13e-02 | -264.013788 | 0.074523 | -263.939265 |
| 6-311+G(d)    | 0.981 | 0.1109 | 6.97e-02 | 11.59 | 1.61e-02 | -264.058457 | 0.074369 | -263.984088 |
| 6-311++G(d,p) | 0.981 | 0.1098 | 6.83e-02 | 11.36 | 1.53e-02 | -264.064600 | 0.074212 | -263.990388 |
| Def2SVP       | 0.966 | 0.1086 | 6.67e-02 | 11.29 | 1.07e-02 | -263.804738 | 0.074634 | -263.730104 |
| Def2SVPD      | 0.968 | 0.1106 | 6.43e-02 | 11.08 | 1.09e-02 | -263.821329 | 0.074667 | -263.746662 |
| Def2TZVP      | 0.990 | 0.1117 | 6.69e-02 | 11.28 | 1.63e-02 | -264.092625 | 0.074356 | -264.018269 |
| Def2TZVPD     | 0.989 | 0.1115 | 6.65e-02 | 11.21 | 1.62e-02 | -264.094079 | 0.074338 | -264.019741 |
| cc-pVDZ       | 0.966 | 0.1099 | 6.82e-02 | 11.37 | 1.38e-02 | -264.014187 | 0.074288 | -263.939899 |
| aug-cc-pVDZ   | 0.965 | 0.1106 | 6.61e-02 | 11.17 | 1.43e-02 | -264.031920 | 0.074334 | -263.957586 |
| cc-pVTZ       | 0.990 | 0.1113 | 6.64e-02 | 11.21 | 1.54e-02 | -264.084440 | 0.074315 | -264.010125 |
| aug-cc-pVTZ   | 0.989 | 0.1112 | 6.55e-02 | 11.13 | 1.50e-02 | -264.088718 | 0.074298 | -264.014420 |

---

---

Table 34: Molecule: Pyrazine

| Level of Theory: PBE0  |       |        |          |        |          |                  |               |                      |
|------------------------|-------|--------|----------|--------|----------|------------------|---------------|----------------------|
| Basis set              | HOMA  | PDI    | MCI      | AV1245 | FLU      | Energy<br>(a.u.) | ZPE<br>(a.u.) | Energy+ZPE<br>(a.u.) |
| 6-31+G(d)              | 0.996 | 0.1077 | 6.32e-02 | 11.13  | 7.40e-03 | -264.018372      | 0.077679      | -263.940693          |
| 6-31++G(d,p)           | 0.996 | 0.1068 | 6.20e-02 | 10.94  | 7.10e-03 | -264.024040      | 0.077478      | -263.946562          |
| 6-311+G(d)             | 0.998 | 0.1090 | 6.53e-02 | 11.28  | 1.11e-02 | -264.066721      | 0.077321      | -263.989400          |
| 6-311++G(d,p)          | 0.998 | 0.1079 | 6.39e-02 | 11.05  | 1.04e-02 | -264.072919      | 0.077117      | -263.995802          |
| Def2SVP                | 0.992 | 0.1067 | 6.21e-02 | 10.94  | 7.04e-03 | -263.815872      | 0.077580      | -263.738292          |
| Def2SVPD               | 0.992 | 0.1086 | 5.99e-02 | 10.77  | 7.10e-03 | -263.830145      | 0.077517      | -263.752628          |
| Def2TZVP               | 1.001 | 0.1096 | 6.23e-02 | 10.96  | 1.09e-02 | -264.102650      | 0.077234      | -264.025416          |
| Def2TZVPD              | 1.000 | 0.1095 | 6.20e-02 | 10.91  | 1.08e-02 | -264.103749      | 0.077218      | -264.026531          |
| cc-pVDZ                | 0.996 | 0.1078 | 6.30e-02 | 10.99  | 8.60e-03 | -264.028489      | 0.077258      | -263.951231          |
| aug-cc-pVDZ            | 0.995 | 0.1085 | 6.13e-02 | 10.83  | 9.01e-03 | -264.043354      | 0.077184      | -263.966170          |
| cc-pVTZ                | 1.001 | 0.1093 | 6.19e-02 | 10.90  | 1.05e-02 | -264.094673      | 0.077201      | -264.017472          |
| aug-cc-pVTZ            | 1.000 | 0.1093 | 6.11e-02 | 10.84  | 1.02e-02 | -264.098159      | 0.077171      | -264.020988          |
| Level of Theory: B3LYP |       |        |          |        |          |                  |               |                      |
| 6-31+G(d)              | 0.989 | 0.1076 | 6.49e-02 | 11.24  | 8.48e-03 | -264.328539      | 0.076932      | -264.251607          |
| 6-31++G(d,p)           | 0.989 | 0.1067 | 6.37e-02 | 11.04  | 8.13e-03 | -264.334354      | 0.076759      | -264.257595          |
| 6-311+G(d)             | 0.996 | 0.1089 | 6.69e-02 | 11.37  | 1.28e-02 | -264.381171      | 0.076592      | -264.304579          |
| 6-311++G(d,p)          | 0.996 | 0.1078 | 6.54e-02 | 11.13  | 1.21e-02 | -264.387337      | 0.076418      | -264.310919          |
| Def2SVP                | 0.986 | 0.1066 | 6.37e-02 | 11.04  | 7.59e-03 | -264.122694      | 0.076845      | -264.045849          |
| Def2SVPD               | 0.987 | 0.1083 | 6.13e-02 | 10.84  | 7.90e-03 | -264.139141      | 0.076866      | -264.062275          |
| Def2TZVP               | 0.999 | 0.1094 | 6.41e-02 | 11.05  | 1.28e-02 | -264.417036      | 0.076686      | -264.340350          |
| Def2TZVPD              | 0.999 | 0.1093 | 6.36e-02 | 11.00  | 1.27e-02 | -264.418265      | 0.076666      | -264.341599          |
| cc-pVDZ                | 0.988 | 0.1077 | 6.49e-02 | 11.12  | 9.72e-03 | -264.332670      | 0.076484      | -264.256186          |
| aug-cc-pVDZ            | 0.988 | 0.1083 | 6.31e-02 | 10.94  | 1.06e-02 | -264.350341      | 0.076536      | -264.273805          |
| cc-pVTZ                | 0.999 | 0.1090 | 6.34e-02 | 10.97  | 1.21e-02 | -264.409470      | 0.076655      | -264.332815          |
| aug-cc-pVTZ            | 0.999 | 0.1089 | 6.27e-02 | 10.90  | 1.17e-02 | -264.413324      | 0.076631      | -264.336693          |



Table 35: Molecule: Pyrazine

Level of Theory: CAM-B3LYP

| Basis set     | HOMA  | PDI    | MCI      | AV1245 | FLU      | Energy<br>(a.u.) | ZPE<br>(a.u.) | Energy+ZPE<br>(a.u.) |
|---------------|-------|--------|----------|--------|----------|------------------|---------------|----------------------|
| 6-31+G(d)     | 0.998 | 0.1071 | 6.38e-02 | 11.15  | 7.66e-03 | -264.188970      | 0.078037      | -264.110933          |
| 6-31++G(d,p)  | 0.998 | 0.1062 | 6.27e-02 | 10.96  | 7.34e-03 | -264.194625      | 0.077838      | -264.116787          |
| 6-311+G(d)    | 1.000 | 0.1083 | 6.60e-02 | 11.29  | 1.20e-02 | -264.242553      | 0.077676      | -264.164877          |
| 6-311++G(d,p) | 1.000 | 0.1073 | 6.46e-02 | 11.07  | 1.14e-02 | -264.248497      | 0.077476      | -264.171021          |
| Def2SVP       | 0.994 | 0.1061 | 6.29e-02 | 10.98  | 6.93e-03 | -263.983590      | 0.077895      | -263.905695          |
| Def2SVPD      | 0.994 | 0.1078 | 6.06e-02 | 10.80  | 7.24e-03 | -264.000508      | 0.077883      | -263.922625          |
| Def2TZVP      | 1.004 | 0.1088 | 6.33e-02 | 11.00  | 1.20e-02 | -264.278966      | 0.077714      | -264.201252          |
| Def2TZVPD     | 1.004 | 0.1086 | 6.29e-02 | 10.96  | 1.19e-02 | -264.280207      | 0.077685      | -264.202522          |
| cc-pVDZ       | 0.998 | 0.1071 | 6.38e-02 | 11.03  | 8.56e-03 | -264.192707      | 0.077555      | -264.115152          |
| aug-cc-pVDZ   | 0.997 | 0.1077 | 6.22e-02 | 10.88  | 9.44e-03 | -264.210744      | 0.077595      | -264.133149          |
| cc-pVTZ       | 1.004 | 0.1084 | 6.27e-02 | 10.92  | 1.15e-02 | -264.271286      | 0.077685      | -264.193601          |
| aug-cc-pVTZ   | 1.004 | 0.1083 | 6.20e-02 | 10.87  | 1.11e-02 | -264.275197      | 0.077652      | -264.197545          |

Level of Theory: wB97XD

|               |       |        |          |       |          |             |          |             |
|---------------|-------|--------|----------|-------|----------|-------------|----------|-------------|
| 6-31+G(d)     | 0.997 | 0.1071 | 6.36e-02 | 11.16 | 7.28e-03 | -264.231165 | 0.077944 | -264.153221 |
| 6-31++G(d,p)  | 0.997 | 0.1062 | 6.24e-02 | 10.97 | 6.97e-03 | -264.236552 | 0.077756 | -264.158796 |
| 6-311+G(d)    | 0.998 | 0.1083 | 6.58e-02 | 11.30 | 1.12e-02 | -264.280914 | 0.077511 | -264.203403 |
| 6-311++G(d,p) | 0.999 | 0.1073 | 6.44e-02 | 11.08 | 1.06e-02 | -264.286742 | 0.077337 | -264.209405 |
| Def2SVP       | 0.993 | 0.1061 | 6.24e-02 | 10.95 | 6.82e-03 | -264.028020 | 0.077796 | -263.950224 |
| Def2SVPD      | 0.993 | 0.1078 | 6.05e-02 | 10.83 | 6.95e-03 | -264.041955 | 0.077729 | -263.964226 |
| Def2TZVP      | 1.001 | 0.1086 | 6.31e-02 | 11.01 | 1.12e-02 | -264.316550 | 0.077563 | -264.238987 |
| Def2TZVPD     | 1.001 | 0.1085 | 6.28e-02 | 10.98 | 1.11e-02 | -264.317606 | 0.077541 | -264.240065 |
| cc-pVDZ       | 0.996 | 0.1070 | 6.34e-02 | 11.01 | 8.43e-03 | -264.239860 | 0.077480 | -264.162380 |
| aug-cc-pVDZ   | 0.995 | 0.1077 | 6.19e-02 | 10.90 | 8.98e-03 | -264.254350 | 0.077441 | -264.176909 |
| cc-pVTZ       | 1.001 | 0.1083 | 6.25e-02 | 10.94 | 1.07e-02 | -264.308394 | 0.077543 | -264.230851 |
| aug-cc-pVTZ   | 1.001 | 0.1083 | 6.20e-02 | 10.90 | 1.04e-02 | -264.311884 | 0.077503 | -264.234381 |

Table 36: Molecule: Pyrazine

| Level of Theory: M06-2X   |       |        |          |        |          |                  |               |                      |
|---------------------------|-------|--------|----------|--------|----------|------------------|---------------|----------------------|
| Basis set                 | HOMA  | PDI    | MCI      | AV1245 | FLU      | Energy<br>(a.u.) | ZPE<br>(a.u.) | Energy+ZPE<br>(a.u.) |
| 6-31+G(d)                 | 0.995 | 0.1068 | 6.32e-02 | 11.06  | 7.38e-03 | -264.211656      | 0.077824      | -264.133832          |
| 6-31++G(d,p)              | 0.995 | 0.1059 | 6.20e-02 | 10.88  | 7.09e-03 | -264.216440      | 0.077601      | -264.138839          |
| 6-311+G(d)                | 0.997 | 0.1080 | 6.52e-02 | 11.21  | 1.09e-02 | -264.268738      | 0.077603      | -264.191135          |
| 6-311++G(d,p)             | 0.997 | 0.1070 | 6.39e-02 | 11.00  | 1.03e-02 | -264.273547      | 0.077356      | -264.196191          |
| Def2SVP                   | 0.991 | 0.1058 | 6.19e-02 | 10.86  | 6.75e-03 | -264.005066      | 0.077801      | -263.927265          |
| Def2SVPD                  | 0.991 | 0.1076 | 5.98e-02 | 10.70  | 6.89e-03 | -264.019443      | 0.077754      | -263.941689          |
| Def2TZVP                  | 0.999 | 0.1083 | 6.24e-02 | 10.93  | 1.08e-02 | -264.303024      | 0.077526      | -264.225498          |
| Def2TZVPD                 | 0.999 | 0.1082 | 6.21e-02 | 10.89  | 1.07e-02 | -264.304030      | 0.077503      | -264.226527          |
| cc-pVDZ                   | 0.995 | 0.1067 | 6.31e-02 | 10.94  | 8.43e-03 | -264.232592      | 0.077406      | -264.155186          |
| aug-cc-pVDZ               | 0.994 | 0.1075 | 6.14e-02 | 10.79  | 8.98e-03 | -264.247544      | 0.077402      | -264.170142          |
| cc-pVTZ                   | 1.000 | 0.1080 | 6.18e-02 | 10.86  | 1.04e-02 | -264.298675      | 0.077497      | -264.221178          |
| aug-cc-pVTZ               | 1.000 | 0.1081 | 6.13e-02 | 10.82  | 1.03e-02 | -264.302200      | 0.077444      | -264.224756          |
| Level of Theory: SOGGA11X |       |        |          |        |          |                  |               |                      |
| Basis set                 | HOMA  | PDI    | MCI      | AV1245 | FLU      | Energy<br>(a.u.) | ZPE<br>(a.u.) | Energy+ZPE<br>(a.u.) |
| 6-31+G(d)                 | 0.992 | 0.1062 | 6.01e-02 | 10.89  | 5.38e-03 | -264.244549      | 0.078645      | -264.165904          |
| 6-31++G(d,p)              | 0.992 | 0.1051 | 5.87e-02 | 10.67  | 5.22e-03 | -264.251035      | 0.078404      | -264.172631          |
| 6-311+G(d)                | 0.996 | 0.1073 | 6.22e-02 | 11.06  | 7.64e-03 | -264.293245      | 0.078211      | -264.215034          |
| 6-311++G(d,p)             | 0.996 | 0.1061 | 6.07e-02 | 10.82  | 7.21e-03 | -264.299385      | 0.077982      | -264.221403          |
| Def2SVP                   | 0.989 | 0.1050 | 5.92e-02 | 10.69  | 5.47e-03 | -264.036295      | 0.078528      | -263.957767          |
| Def2SVPD                  | 0.989 | 0.1067 | 5.71e-02 | 10.54  | 5.36e-03 | -264.048648      | 0.078366      | -263.970282          |
| Def2TZVP                  | 0.998 | 0.1076 | 5.89e-02 | 10.72  | 7.24e-03 | -264.328668      | 0.078264      | -264.250404          |
| Def2TZVPD                 | 0.998 | 0.1074 | 5.86e-02 | 10.67  | 7.16e-03 | -264.329652      | 0.078255      | -264.251397          |
| cc-pVDZ                   | 0.993 | 0.1060 | 6.00e-02 | 10.74  | 6.46e-03 | -264.259234      | 0.078231      | -264.181003          |
| aug-cc-pVDZ               | 0.991 | 0.1065 | 5.82e-02 | 10.60  | 6.48e-03 | -264.272159      | 0.078067      | -264.194092          |
| cc-pVTZ                   | 0.998 | 0.1072 | 5.84e-02 | 10.64  | 7.09e-03 | -264.318325      | 0.078204      | -264.240121          |
| aug-cc-pVTZ               | 0.998 | 0.1072 | 5.78e-02 | 10.59  | 6.85e-03 | -264.322118      | 0.078154      | -264.243964          |

Table 37: Molecule: Pyrazine

| Level of Theory: M11  |       |        |          |        |          |                  |               |                      |
|-----------------------|-------|--------|----------|--------|----------|------------------|---------------|----------------------|
| Basis set             | HOMA  | PDI    | MCI      | AV1245 | FLU      | Energy<br>(a.u.) | ZPE<br>(a.u.) | Energy+ZPE<br>(a.u.) |
| 6-31+G(d)             | 0.995 | 0.1072 | 6.41e-02 | 11.20  | 8.70e-03 | -264.171889      | 0.077348      | -264.094541          |
| 6-31++G(d,p)          | 0.995 | 0.1064 | 6.32e-02 | 11.05  | 8.38e-03 | -264.176532      | 0.077142      | -264.099390          |
| 6-311+G(d)            | 0.997 | 0.1084 | 6.67e-02 | 11.36  | 1.38e-02 | -264.228861      | 0.076923      | -264.151938          |
| 6-311++G(d,p)         | 0.998 | 0.1075 | 6.55e-02 | 11.17  | 1.32e-02 | -264.233632      | 0.076743      | -264.156889          |
| Def2SVP               | 0.991 | 0.1062 | 6.30e-02 | 11.03  | 7.54e-03 | -263.957297      | 0.077247      | -263.880050          |
| Def2SVPD              | 0.990 | 0.1081 | 6.14e-02 | 10.95  | 8.05e-03 | -263.972510      | 0.077180      | -263.895330          |
| Def2TZVP              | 1.001 | 0.1088 | 6.47e-02 | 11.14  | 1.43e-02 | -264.270642      | 0.077196      | -264.193446          |
| Def2TZVPD             | 1.001 | 0.1088 | 6.43e-02 | 11.11  | 1.40e-02 | -264.272870      | 0.077170      | -264.195700          |
| cc-pVDZ               | 0.994 | 0.1071 | 6.39e-02 | 11.08  | 9.30e-03 | -264.180026      | 0.076836      | -264.103190          |
| aug-cc-pVDZ           | 0.994 | 0.1080 | 6.28e-02 | 11.01  | 1.05e-02 | -264.196234      | 0.076779      | -264.119455          |
| cc-pVTZ               | 1.003 | 0.1082 | 6.38e-02 | 11.01  | 1.35e-02 | -264.268362      | 0.077334      | -264.191028          |
| aug-cc-pVTZ           | 1.002 | 0.1082 | 6.34e-02 | 10.98  | 1.34e-02 | -264.274214      | 0.077153      | -264.197061          |
| Level of Theory: MN15 |       |        |          |        |          |                  |               |                      |
| 6-31+G(d)             | 0.992 | 0.1080 | 6.46e-02 | 11.19  | 8.05e-03 | -264.010491      | 0.077457      | -263.933034          |
| 6-31++G(d,p)          | 0.992 | 0.1072 | 6.36e-02 | 11.02  | 7.77e-03 | -264.014870      | 0.077258      | -263.937612          |
| 6-311+G(d)            | 0.998 | 0.1092 | 6.64e-02 | 11.30  | 1.21e-02 | -264.055452      | 0.077157      | -263.978295          |
| 6-311++G(d,p)         | 0.998 | 0.1083 | 6.51e-02 | 11.09  | 1.15e-02 | -264.060397      | 0.076993      | -263.983404          |
| Def2SVP               | 0.990 | 0.1069 | 6.34e-02 | 10.99  | 7.24e-03 | -263.772057      | 0.077619      | -263.694438          |
| Def2SVPD              | 0.991 | 0.1093 | 6.11e-02 | 10.80  | 7.60e-03 | -263.790483      | 0.077608      | -263.712875          |
| Def2TZVP              | 0.999 | 0.1101 | 6.40e-02 | 11.01  | 1.28e-02 | -264.092610      | 0.077228      | -264.015382          |
| Def2TZVPD             | 0.999 | 0.1102 | 6.37e-02 | 10.98  | 1.27e-02 | -264.094072      | 0.077134      | -264.016938          |
| cc-pVDZ               | 0.992 | 0.1080 | 6.43e-02 | 11.04  | 9.07e-03 | -264.014039      | 0.077163      | -263.936876          |
| aug-cc-pVDZ           | 0.992 | 0.1092 | 6.26e-02 | 10.88  | 1.00e-02 | -264.033154      | 0.077208      | -263.955946          |
| cc-pVTZ               | 0.999 | 0.1099 | 6.33e-02 | 10.94  | 1.20e-02 | -264.084751      | 0.077187      | -264.007564          |
| aug-cc-pVTZ           | 0.999 | 0.1102 | 6.27e-02 | 10.90  | 1.17e-02 | -264.090568      | 0.077129      | -264.013439          |

## A.5.2 CCSD

Table 38: Molecule: Pyrazine

| Basis set     | HOMA  | PDI    | MCI      | AV1245 | FLU      | Energy<br>(a.u.) | ZPE<br>(a.u.) | Energy+ZPE<br>(a.u.) |
|---------------|-------|--------|----------|--------|----------|------------------|---------------|----------------------|
| 6-31+G(d)     | 0.986 | 0.0619 | 4.17e-02 | 7.762  | 2.57e-02 | -263.542771      | 0.077052      | -263.465719          |
| 6-31++G(d,p)  | 0.987 | 0.0611 | 4.07e-02 | 7.593  | 2.77e-02 | -263.574308      | 0.077293      | -263.497015          |
| 6-311+G(d)    | 0.986 | 0.0626 | 4.28e-02 | 7.846  | 2.36e-02 | -263.621210      | 0.076531      | -263.544679          |
| 6-311++G(d,p) | 0.985 | 0.0618 | 4.18e-02 | 7.675  | 2.53e-02 | -263.650313      | 0.076404      | -263.573909          |
| Def2SVP       | 0.984 | 0.0610 | 4.11e-02 | 7.606  | 2.70e-02 | -263.341077      | 0.077777      | -263.263300          |
| Def2SVPD      | 0.980 | 0.0624 | 3.91e-02 | 7.461  | 2.80e-02 | -263.385834      | 0.077439      | -263.308395          |
| Def2TZVP      | 0.998 | 0.0638 | 4.05e-02 | 7.685  | 2.42e-02 | -263.794072      | 0.077370      | -263.716702          |
| Def2TZVPD     | 0.998 | 0.0638 | 4.03e-02 | 7.651  | 2.44e-02 | -263.798944      | 0.077257      | -263.721687          |
| cc-pVDZ       | 0.966 | 0.0614 | 4.18e-02 | 7.632  | 2.53e-02 | -263.565635      | 0.077144      | -263.488491          |
| aug-cc-pVDZ   | 0.959 | 0.0619 | 4.00e-02 | 7.492  | 2.61e-02 | -263.607514      | 0.076596      | -263.530918          |
| cc-pVTZ       | 0.999 | 0.0636 | 4.03e-02 | 7.640  | 2.48e-02 | -263.798215      | 0.077574      | -263.720641          |
| aug-cc-pVTZ   | 0.998 | 0.0638 | 3.97e-02 | 7.597  | 2.54e-02 | -263.815060      | 0.077347      | -263.737713          |

## A.5.3 CASSCF(8,8)

Table 39: Molecule: Pyrazine

| Basis set  | HOMA  | PDI    | MCI      | AV1245 | FLU      | Energy<br>(a.u.) | ZPE<br>(a.u.) | Energy+ZPE<br>(a.u.) |
|------------|-------|--------|----------|--------|----------|------------------|---------------|----------------------|
| 6-31+G(d)  | 0.989 | 0.1031 | 5.75e-02 | 10.57  | 4.50e-03 | -262.802208      | 0.080667      | -262.721541          |
| 6-311+G(d) | 0.998 | 0.1056 | 5.93e-02 | 10.76  | 3.44e-03 | -262.830482      | 0.077451      | -262.753031          |
| Def2SVP    | 0.987 | 0.1018 | 5.65e-02 | 10.35  | 4.54e-03 | -262.594400      | 0.080491      | -262.513909          |
| Def2TZVP   | 0.994 | 0.1038 | 5.59e-02 | 10.39  | 5.22e-03 | -262.889053      | 0.080044      | -262.809009          |
| cc-pVDZ    | 0.997 | 0.1042 | 5.69e-02 | 10.41  | 3.36e-03 | -262.796427      | 0.080321      | -262.716106          |
| cc-pVTZ    | 1.001 | 0.1053 | 5.53e-02 | 10.36  | 3.45e-03 | -262.862211      | 0.092585      | -262.769626          |

## A.5.4 MP2

Table 40: Molecule: Pyrazine

| Basis set     | HOMA  | PDI    | MCI      | AV1245 | FLU      | Energy<br>(a.u.) | ZPE<br>(a.u.) | Energy+ZPE<br>(a.u.) |
|---------------|-------|--------|----------|--------|----------|------------------|---------------|----------------------|
| 6-31+G(d)     | 0.983 | 0.0618 | 4.27e-02 | 7.808  | 2.21e-02 | -263.520672      | 0.077036      | -263.443636          |
| 6-31++G(d,p)  | 0.983 | 0.0610 | 4.18e-02 | 7.636  | 2.38e-02 | -263.551548      | 0.076970      | -263.474578          |
| 6-311+G(d)    | 0.984 | 0.0622 | 4.35e-02 | 7.832  | 2.02e-02 | -263.602562      | 0.076499      | -263.526063          |
| 6-311++G(d,p) | 0.983 | 0.0613 | 4.26e-02 | 7.656  | 2.17e-02 | -263.630882      | 0.076048      | -263.554834          |
| Def2SVP       | 0.984 | 0.0612 | 4.23e-02 | 7.696  | 2.34e-02 | -263.313739      | 0.077736      | -263.236003          |
| Def2SVPD      | 0.978 | 0.0622 | 3.96e-02 | 7.427  | 2.45e-02 | -263.362871      | 0.077380      | -263.285491          |
| Def2TZVP      | 0.997 | 0.0626 | 4.06e-02 | 7.527  | 2.11e-02 | -263.781231      | 0.077031      | -263.704200          |
| Def2TZVPD     | 0.997 | 0.0625 | 4.02e-02 | 7.473  | 2.14e-02 | -263.786770      | 0.076904      | -263.709866          |
| cc-pVDZ       | 0.962 | 0.0615 | 4.29e-02 | 7.675  | 2.15e-02 | -263.539511      | 0.077132      | -263.462379          |
| aug-cc-pVDZ   | 0.951 | 0.0614 | 4.04e-02 | 7.422  | 2.24e-02 | -263.585306      | 0.076518      | -263.508788          |
| cc-pVTZ       | 0.997 | 0.0623 | 4.03e-02 | 7.481  | 2.19e-02 | -263.787653      | 0.077248      | -263.710405          |
| aug-cc-pVTZ   | 0.996 | 0.0623 | 3.94e-02 | 7.396  | 2.26e-02 | -263.806950      | 0.076962      | -263.729988          |

## B Statistical Summary of the Aromaticity Indexes

The mean value, standard deviation (Std), maximum value (Max) and minimum value (Min) observed within each electronic structure method for each aromaticity index and molecule are calculated and reported in the following five tables.

Table 41: Statistical summary of the HOMA index

|            |       | CCSD  | CASSCF | MP2   | LSDA  | PBE   | PBE0  | B3LYP | CAM-B3LYP | wB97XD | M06-2X | SOGGA11X | M11   | MN15  |
|------------|-------|-------|--------|-------|-------|-------|-------|-------|-----------|--------|--------|----------|-------|-------|
| Benzene    | Mean: | 0.965 | 0.994  | 0.964 | 0.999 | 0.953 | 0.995 | 0.984 | 0.998     | 0.995  | 0.994  | 0.987    | 0.995 | 0.989 |
|            | Std:  | 0.031 | 0.014  | 0.030 | 0.004 | 0.023 | 0.005 | 0.012 | 0.004     | 0.005  | 0.005  | 0.009    | 0.005 | 0.009 |
|            | Max:  | 0.996 | 1.002  | 0.993 | 1.005 | 0.980 | 1.000 | 0.998 | 1.002     | 1.000  | 1.000  | 0.998    | 1.001 | 1.000 |
|            | Min:  | 0.902 | 0.952  | 0.897 | 0.995 | 0.930 | 0.989 | 0.970 | 0.993     | 0.988  | 0.988  | 0.977    | 0.988 | 0.979 |
| Pyridine   | Mean: | 0.980 | 0.992  | 0.978 | 1.001 | 0.968 | 0.998 | 0.991 | 1.000     | 0.998  | 0.997  | 0.993    | 0.998 | 0.994 |
|            | Std:  | 0.019 | 0.006  | 0.019 | 0.004 | 0.016 | 0.003 | 0.007 | 0.003     | 0.003  | 0.003  | 0.005    | 0.004 | 0.005 |
|            | Max:  | 0.999 | 1.002  | 0.997 | 1.006 | 0.988 | 1.001 | 1.000 | 1.004     | 1.001  | 1.000  | 0.999    | 1.003 | 1.000 |
|            | Min:  | 0.941 | 0.982  | 0.935 | 0.996 | 0.952 | 0.993 | 0.983 | 0.996     | 0.993  | 0.993  | 0.987    | 0.993 | 0.989 |
| Pyridazine | Mean: | 0.958 | 0.807  | 0.960 | 0.995 | 0.958 | 0.991 | 0.980 | 0.987     | 0.987  | 0.986  | 0.987    | 0.987 | 0.985 |
|            | Std:  | 0.017 | 0.007  | 0.019 | 0.002 | 0.013 | 0.001 | 0.005 | 0.002     | 0.001  | 0.001  | 0.002    | 0.002 | 0.003 |
|            | Max:  | 0.975 | 0.822  | 0.979 | 0.998 | 0.974 | 0.993 | 0.987 | 0.990     | 0.989  | 0.988  | 0.990    | 0.990 | 0.989 |
|            | Min:  | 0.923 | 0.792  | 0.918 | 0.992 | 0.943 | 0.989 | 0.973 | 0.985     | 0.985  | 0.985  | 0.984    | 0.985 | 0.980 |
| Pyrimidine | Mean: | 0.991 | 0.991  | 0.989 | 1.003 | 0.983 | 1.000 | 0.997 | 1.002     | 1.001  | 1.000  | 0.998    | 1.001 | 0.999 |
|            | Std:  | 0.009 | 0.006  | 0.011 | 0.004 | 0.009 | 0.002 | 0.003 | 0.003     | 0.002  | 0.002  | 0.002    | 0.003 | 0.002 |
|            | Max:  | 1.000 | 1.002  | 0.999 | 1.008 | 0.994 | 1.003 | 1.000 | 1.007     | 1.003  | 1.002  | 1.001    | 1.006 | 1.001 |
|            | Min:  | 0.970 | 0.987  | 0.964 | 0.998 | 0.973 | 0.997 | 0.993 | 0.998     | 0.998  | 0.997  | 0.995    | 0.997 | 0.996 |
| Pyrazine   | Mean: | 0.986 | 0.991  | 0.983 | 1.000 | 0.976 | 0.997 | 0.993 | 1.000     | 0.998  | 0.996  | 0.994    | 0.997 | 0.995 |
|            | Std:  | 0.013 | 0.005  | 0.014 | 0.005 | 0.011 | 0.003 | 0.005 | 0.004     | 0.003  | 0.003  | 0.004    | 0.004 | 0.004 |
|            | Max:  | 0.999 | 1.001  | 0.997 | 1.005 | 0.990 | 1.001 | 0.999 | 1.004     | 1.001  | 1.000  | 0.998    | 1.003 | 0.999 |
|            | Min:  | 0.959 | 0.987  | 0.951 | 0.993 | 0.965 | 0.992 | 0.986 | 0.994     | 0.993  | 0.991  | 0.989    | 0.990 | 0.990 |

Table 42: Statistical summary of the PDI

|            |       | CCSD   | CASSCF | MP2    | LSDA   | PBE    | PBE0   | B3LYP  | CAM-B3LYP | wB97XD | M06-2X | SOGGA11X | M11    | MN15   |        |
|------------|-------|--------|--------|--------|--------|--------|--------|--------|-----------|--------|--------|----------|--------|--------|--------|
| Benzene    | Mean: | 0.0599 | 0.1007 | 0.0598 | 0.1074 | 0.1052 | 0.1040 | 0.1035 | 0.1034    | 0.1034 | 0.1035 | 0.1022   | 0.1044 | 0.1048 |        |
|            | Std:  | 0.0010 | 0.0007 | 0.0006 | 0.0008 | 0.0007 | 0.0008 | 0.0007 | 0.0007    | 0.0007 | 0.0006 | 0.0006   | 0.0008 | 0.0006 | 0.0007 |
|            | Max:  | 0.0615 | 0.1017 | 0.0608 | 0.1086 | 0.1063 | 0.1052 | 0.1048 | 0.1046    | 0.1046 | 0.1047 | 0.1047   | 0.1037 | 0.1056 | 0.1058 |
|            | Min:  | 0.0588 | 0.0991 | 0.0590 | 0.1059 | 0.1039 | 0.1028 | 0.1024 | 0.1023    | 0.1023 | 0.1024 | 0.1024   | 0.1011 | 0.1035 | 0.1035 |
| Pyridine   | Mean: | 0.0599 | 0.0986 | 0.0609 | 0.1072 | 0.1053 | 0.1033 | 0.1032 | 0.1027    | 0.1026 | 0.1026 | 0.1011   | 0.1033 | 0.1042 |        |
|            | Std:  | 0.0009 | 0.0005 | 0.0005 | 0.0010 | 0.0008 | 0.0008 | 0.0008 | 0.0007    | 0.0007 | 0.0007 | 0.0007   | 0.0007 | 0.0007 | 0.0009 |
|            | Max:  | 0.0612 | 0.0994 | 0.0617 | 0.1086 | 0.1065 | 0.1044 | 0.1043 | 0.1037    | 0.1037 | 0.1036 | 0.1023   | 0.1043 | 0.1053 |        |
|            | Min:  | 0.0587 | 0.0977 | 0.0601 | 0.1055 | 0.1039 | 0.1018 | 0.1018 | 0.1013    | 0.1014 | 0.1013 | 0.0997   | 0.1020 | 0.1026 |        |
| Pyridazine | Mean: | 0.0600 | 0.0878 | 0.0598 | 0.1093 | 0.1077 | 0.1053 | 0.1052 | 0.1044    | 0.1045 | 0.1043 | 0.1032   | 0.1045 | 0.1059 |        |
|            | Std:  | 0.0009 | 0.0001 | 0.0004 | 0.0010 | 0.0008 | 0.0008 | 0.0007 | 0.0007    | 0.0006 | 0.0006 | 0.0006   | 0.0007 | 0.0009 |        |
|            | Max:  | 0.0612 | 0.0880 | 0.0604 | 0.1104 | 0.1087 | 0.1063 | 0.1061 | 0.1053    | 0.1053 | 0.1049 | 0.1039   | 0.1054 | 0.1069 |        |
|            | Min:  | 0.0589 | 0.0876 | 0.0590 | 0.1076 | 0.1063 | 0.1040 | 0.1039 | 0.1031    | 0.1032 | 0.1031 | 0.1019   | 0.1033 | 0.1043 |        |
| Pyrimidine | Mean: | 0.0590 | 0.0941 | 0.0634 | 0.1056 | 0.1040 | 0.1004 | 0.1009 | 0.0998    | 0.0996 | 0.0996 | 0.0972   | 0.1000 | 0.1014 |        |
|            | Std:  | 0.0008 | 0.0006 | 0.0006 | 0.0012 | 0.0009 | 0.0009 | 0.0009 | 0.0009    | 0.0008 | 0.0008 | 0.0008   | 0.0009 | 0.0011 |        |
|            | Max:  | 0.0600 | 0.0957 | 0.0642 | 0.1070 | 0.1052 | 0.1016 | 0.1020 | 0.1008    | 0.1006 | 0.1005 | 0.0983   | 0.1011 | 0.1027 |        |
|            | Min:  | 0.0578 | 0.0931 | 0.0623 | 0.1036 | 0.1024 | 0.0987 | 0.0992 | 0.0981    | 0.0980 | 0.0981 | 0.0955   | 0.0983 | 0.0996 |        |
| Pyrazine   | Mean: | 0.0624 | 0.1035 | 0.0619 | 0.1121 | 0.1104 | 0.1084 | 0.1082 | 0.1076    | 0.1076 | 0.1073 | 0.1065   | 0.1077 | 0.1089 |        |
|            | Std:  | 0.0011 | 0.0010 | 0.0005 | 0.0012 | 0.0010 | 0.0010 | 0.0010 | 0.0009    | 0.0009 | 0.0009 | 0.0009   | 0.0009 | 0.0012 |        |
|            | Max:  | 0.0638 | 0.1056 | 0.0626 | 0.1135 | 0.1117 | 0.1096 | 0.1094 | 0.1088    | 0.1086 | 0.1083 | 0.1076   | 0.1088 | 0.1102 |        |
|            | Min:  | 0.0610 | 0.1018 | 0.0610 | 0.1100 | 0.1086 | 0.1067 | 0.1066 | 0.1061    | 0.1061 | 0.1058 | 0.1050   | 0.1062 | 0.1069 |        |

Table 43: Statistical summary of the MCI

|            |       | CCSD    | CASSCF  | MP2     | LSDA    | PBE     | PBE0    | B3LYP   | CAM-B3LYP | wB97XD  | M06-2X  | SOGGA11X | M11     | MN15    |
|------------|-------|---------|---------|---------|---------|---------|---------|---------|-----------|---------|---------|----------|---------|---------|
| Benzene    | Mean: | 4.77e-2 | 7.07e-2 | 4.85e-2 | 7.43e-2 | 7.36e-2 | 7.22e-2 | 7.22e-2 | 7.22e-2   | 7.23e-2 | 7.22e-2 | 7.08e-2  | 7.36e-2 | 7.21e-2 |
|            | Std:  | 1.13e-3 | 1.79e-3 | 1.64e-3 | 1.75e-3 | 1.71e-3 | 1.59e-3 | 1.71e-3 | 1.61e-3   | 1.49e-3 | 1.49e-3 | 1.56e-3  | 1.39e-3 | 1.65e-3 |
|            | Max:  | 5.00e-2 | 7.20e-2 | 5.16e-2 | 7.75e-2 | 7.69e-2 | 7.55e-2 | 7.56e-2 | 7.54e-2   | 7.54e-2 | 7.52e-2 | 7.40e-2  | 7.63e-2 | 7.54e-2 |
|            | Min:  | 4.59e-2 | 6.80e-2 | 4.64e-2 | 7.20e-2 | 7.15e-2 | 7.04e-2 | 7.01e-2 | 7.02e-2   | 7.06e-2 | 7.05e-2 | 6.89e-2  | 7.15e-2 | 7.02e-2 |
| Pyridine   | Mean: | 4.38e-2 | 6.12e-2 | 4.53e-2 | 6.96e-2 | 6.96e-2 | 6.63e-2 | 6.73e-2 | 6.67e-2   | 6.66e-2 | 6.62e-2 | 6.36e-2  | 6.77e-2 | 6.70e-2 |
|            | Std:  | 1.00e-3 | 1.59e-3 | 1.43e-3 | 1.35e-3 | 1.39e-3 | 1.31e-3 | 1.37e-3 | 1.27e-3   | 1.22e-3 | 1.26e-3 | 1.33e-3  | 1.07e-3 | 1.29e-3 |
|            | Max:  | 4.56e-2 | 6.22e-2 | 4.74e-2 | 7.20e-2 | 7.22e-2 | 6.90e-2 | 6.99e-2 | 6.92e-2   | 6.92e-2 | 6.88e-2 | 6.65e-2  | 7.00e-2 | 6.94e-2 |
|            | Min:  | 4.23e-2 | 5.81e-2 | 4.34e-2 | 6.76e-2 | 6.77e-2 | 6.44e-2 | 6.52e-2 | 6.48e-2   | 6.48e-2 | 6.42e-2 | 6.19e-2  | 6.62e-2 | 6.50e-2 |
| Pyridazine | Mean: | 4.27e-2 | 4.50e-2 | 4.43e-2 | 7.08e-2 | 7.11e-2 | 6.71e-2 | 6.81e-2 | 6.69e-2   | 6.70e-2 | 6.64e-2 | 6.40e-2  | 6.76e-2 | 6.76e-2 |
|            | Std:  | 9.07e-4 | 6.44e-4 | 1.30e-3 | 1.27e-3 | 1.30e-3 | 1.23e-3 | 1.25e-3 | 1.18e-3   | 1.15e-3 | 1.18e-3 | 1.26e-3  | 1.07e-3 | 1.17e-3 |
|            | Max:  | 4.44e-2 | 4.55e-2 | 4.62e-2 | 7.31e-2 | 7.35e-2 | 6.97e-2 | 7.06e-2 | 6.94e-2   | 6.95e-2 | 6.89e-2 | 6.68e-2  | 6.99e-2 | 7.00e-2 |
|            | Min:  | 4.13e-2 | 4.36e-2 | 4.24e-2 | 6.87e-2 | 6.92e-2 | 6.53e-2 | 6.61e-2 | 6.50e-2   | 6.51e-2 | 6.45e-2 | 6.24e-2  | 6.57e-2 | 6.56e-2 |
| Pyrimidine | Mean: | 4.10e-2 | 5.61e-2 | 4.46e-2 | 6.70e-2 | 6.75e-2 | 6.22e-2 | 6.41e-2 | 6.27e-2   | 6.25e-2 | 6.20e-2 | 5.84e-2  | 6.34e-2 | 6.34e-2 |
|            | Std:  | 1.06e-3 | 1.42e-3 | 1.40e-3 | 1.32e-3 | 1.33e-3 | 1.31e-3 | 1.34e-3 | 1.28e-3   | 1.27e-3 | 1.29e-3 | 1.34e-3  | 1.29e-3 | 1.25e-3 |
|            | Max:  | 4.29e-2 | 5.87e-2 | 4.69e-2 | 6.95e-2 | 7.00e-2 | 6.51e-2 | 6.68e-2 | 6.54e-2   | 6.52e-2 | 6.47e-2 | 6.13e-2  | 6.61e-2 | 6.59e-2 |
|            | Min:  | 3.94e-2 | 5.31e-2 | 4.27e-2 | 6.45e-2 | 6.51e-2 | 6.00e-2 | 6.16e-2 | 6.03e-2   | 6.02e-2 | 5.96e-2 | 5.64e-2  | 6.10e-2 | 6.09e-2 |
| Pyrazine   | Mean: | 4.08e-2 | 5.72e-2 | 4.14e-2 | 6.63e-2 | 6.70e-2 | 6.23e-2 | 6.40e-2 | 6.31e-2   | 6.29e-2 | 6.23e-2 | 5.92e-2  | 6.39e-2 | 6.37e-2 |
|            | Std:  | 1.06e-3 | 9.95e-4 | 1.42e-3 | 1.41e-3 | 1.43e-3 | 1.40e-3 | 1.42e-3 | 1.36e-3   | 1.34e-3 | 1.37e-3 | 1.40e-3  | 1.36e-3 | 1.34e-3 |
|            | Max:  | 4.28e-2 | 5.93e-2 | 4.35e-2 | 6.91e-2 | 6.97e-2 | 6.53e-2 | 6.69e-2 | 6.60e-2   | 6.58e-2 | 6.52e-2 | 6.22e-2  | 6.67e-2 | 6.64e-2 |
|            | Min:  | 3.91e-2 | 5.53e-2 | 3.94e-2 | 6.36e-2 | 6.43e-2 | 5.99e-2 | 6.13e-2 | 6.06e-2   | 6.05e-2 | 5.98e-2 | 5.71e-2  | 6.14e-2 | 6.11e-2 |

Table 44: Statistical summary of the AV1245 Index

|            |       | CCSD | CASSCF | MP2  | LSDA  | PBE   | PBE0  | B3LYP | CAM-B3LYP | wB97XD | M06-2X | SOGGA11X | M11   | MN15  |
|------------|-------|------|--------|------|-------|-------|-------|-------|-----------|--------|--------|----------|-------|-------|
| Benzene    | Mean: | 7.44 | 10.49  | 7.43 | 10.89 | 10.79 | 10.64 | 10.63 | 10.64     | 10.67  | 10.63  | 10.47    | 10.82 | 10.64 |
|            | Std:  | 0.15 | 0.22   | 0.21 | 0.23  | 0.23  | 0.21  | 0.23  | 0.21      | 0.19   | 0.19   | 0.21     | 0.17  | 0.21  |
|            | Max:  | 7.70 | 10.64  | 7.82 | 11.28 | 11.20 | 11.04 | 11.04 | 11.02     | 11.04  | 11.00  | 10.87    | 11.14 | 11.04 |
|            | Min:  | 7.18 | 10.18  | 7.14 | 10.58 | 10.50 | 10.39 | 10.33 | 10.37     | 10.44  | 10.40  | 10.21    | 10.55 | 10.37 |
| Pyridine   | Mean: | 6.99 | 9.57   | 7.13 | 10.35 | 10.31 | 9.98  | 10.06 | 10.01     | 10.01  | 9.98   | 9.69     | 10.16 | 10.06 |
|            | Std:  | 0.12 | 0.20   | 0.18 | 0.16  | 0.17  | 0.16  | 0.17  | 0.15      | 0.14   | 0.15   | 0.16     | 0.12  | 0.15  |
|            | Max:  | 7.22 | 9.70   | 7.40 | 10.62 | 10.61 | 10.29 | 10.37 | 10.29     | 10.31  | 10.27  | 10.02    | 10.41 | 10.33 |
|            | Min:  | 6.81 | 9.20   | 6.91 | 10.14 | 10.09 | 9.79  | 9.85  | 9.82      | 9.83   | 9.78   | 9.50     | 10.00 | 9.85  |
| Pyridazine | Mean: | 6.51 | 7.11   | 6.50 | 9.96  | 9.98  | 9.58  | 9.67  | 9.57      | 9.58   | 9.57   | 9.26     | 9.69  | 9.67  |
|            | Std:  | 0.11 | 0.09   | 0.17 | 0.15  | 0.16  | 0.14  | 0.15  | 0.14      | 0.13   | 0.13   | 0.15     | 0.11  | 0.13  |
|            | Max:  | 6.70 | 7.19   | 6.71 | 10.18 | 10.22 | 9.84  | 9.92  | 9.81      | 9.83   | 9.82   | 9.55     | 9.92  | 9.91  |
|            | Min:  | 6.34 | 6.93   | 6.27 | 9.74  | 9.76  | 9.39  | 9.45  | 9.37      | 9.39   | 9.37   | 9.07     | 9.51  | 9.47  |
| Pyrimidine | Mean: | 6.47 | 8.37   | 7.02 | 9.78  | 9.78  | 9.20  | 9.40  | 9.23      | 9.21   | 9.19   | 8.73     | 9.34  | 9.34  |
|            | Std:  | 0.11 | 0.15   | 0.16 | 0.13  | 0.14  | 0.13  | 0.14  | 0.13      | 0.13   | 0.13   | 0.14     | 0.13  | 0.12  |
|            | Max:  | 6.68 | 8.65   | 7.29 | 10.04 | 10.04 | 9.49  | 9.68  | 9.51      | 9.49   | 9.47   | 9.03     | 9.61  | 9.60  |
|            | Min:  | 6.30 | 8.04   | 6.81 | 9.54  | 9.55  | 8.99  | 9.15  | 9.01      | 8.99   | 8.98   | 8.54     | 9.12  | 9.11  |
| Pyrazine   | Mean: | 7.64 | 10.52  | 7.59 | 11.29 | 11.29 | 10.96 | 11.05 | 10.99     | 11.00  | 10.91  | 10.72    | 11.09 | 11.01 |
|            | Std:  | 0.10 | 0.12   | 0.15 | 0.14  | 0.15  | 0.14  | 0.15  | 0.13      | 0.13   | 0.13   | 0.14     | 0.11  | 0.13  |
|            | Max:  | 7.85 | 10.76  | 7.83 | 11.58 | 11.59 | 11.28 | 11.37 | 11.29     | 11.30  | 11.21  | 11.06    | 11.36 | 11.30 |
|            | Min:  | 7.46 | 10.35  | 7.40 | 11.09 | 11.08 | 10.77 | 10.84 | 10.80     | 10.83  | 10.70  | 10.54    | 10.95 | 10.80 |

Table 45: Statistical summary of the FLU Index

|            |       | CCSD    | CASSCF  | MP2     | LSDA    | PBE     | PBE0    | B3LYP   | CAM-B3LYP | wB97XD  | M06-2X  | SOGGA11X | M11     | MN15    |
|------------|-------|---------|---------|---------|---------|---------|---------|---------|-----------|---------|---------|----------|---------|---------|
| Benzene    | Mean: | 2.86e-2 | 8.21e-5 | 2.64e-2 | 8.00e-6 | 5.27e-5 | 3.57e-5 | 5.09e-5 | 2.13e-5   | 3.04e-5 | 3.98e-5 | 8.18e-5  | 7.50e-6 | 1.72e-5 |
|            | Std:  | 1.42e-3 | 1.39e-4 | 1.13e-3 | 1.34e-5 | 3.53e-5 | 2.74e-5 | 3.47e-5 | 1.75e-5   | 2.28e-5 | 2.87e-5 | 5.05e-5  | 6.27e-6 | 1.54e-5 |
|            | Max:  | 3.10e-2 | 4.16e-4 | 2.85e-2 | 3.90e-5 | 1.29e-4 | 9.70e-5 | 1.25e-4 | 6.50e-5   | 7.90e-5 | 1.01e-4 | 1.71e-4  | 1.60e-5 | 5.90e-5 |
|            | Min:  | 2.69e-2 | 0.00e+0 | 2.45e-2 | 0.00e+0 | 0.00e+0 | 0.00e+0 | 0.00e+0 | 2.00e-6   | 0.00e+0 | 0.00e+0 | 1.00e-6  | 0.00e+0 | 4.00e-6 |
| Pyridine   | Mean: | 2.80e-2 | 1.16e-3 | 2.49e-2 | 6.45e-3 | 6.32e-3 | 3.78e-3 | 4.59e-3 | 4.11e-3   | 3.82e-3 | 3.65e-3 | 2.39e-3  | 4.66e-3 | 4.34e-3 |
|            | Std:  | 1.25e-3 | 3.47e-4 | 1.01e-3 | 1.32e-3 | 1.07e-3 | 8.23e-4 | 1.03e-3 | 1.04e-3   | 9.16e-4 | 8.23e-4 | 4.30e-4  | 1.33e-3 | 1.06e-3 |
|            | Max:  | 2.97e-2 | 1.98e-3 | 2.64e-2 | 7.95e-3 | 7.46e-3 | 4.69e-3 | 5.71e-3 | 5.24e-3   | 4.81e-3 | 4.51e-3 | 2.91e-3  | 6.19e-3 | 5.62e-3 |
|            | Min:  | 2.63e-2 | 9.18e-4 | 2.31e-2 | 4.46e-3 | 4.70e-3 | 2.71e-3 | 3.09e-3 | 2.68e-3   | 2.61e-3 | 2.50e-3 | 1.75e-3  | 2.82e-3 | 2.85e-3 |
| Pyridazine | Mean: | 3.04e-2 | 2.60e-2 | 2.69e-2 | 8.81e-3 | 9.18e-3 | 6.33e-3 | 7.52e-3 | 7.32e-3   | 6.92e-3 | 6.63e-3 | 4.95e-3  | 7.87e-3 | 7.27e-3 |
|            | Std:  | 1.09e-3 | 1.60e-3 | 7.13e-4 | 1.35e-3 | 1.14e-3 | 9.51e-4 | 1.22e-3 | 1.27e-3   | 1.12e-3 | 1.05e-3 | 5.81e-4  | 1.53e-3 | 1.28e-3 |
|            | Max:  | 3.18e-2 | 3.00e-2 | 2.79e-2 | 1.05e-2 | 1.07e-2 | 7.62e-3 | 9.13e-3 | 9.03e-3   | 8.39e-3 | 7.98e-3 | 5.82e-3  | 9.67e-3 | 8.75e-3 |
|            | Min:  | 2.88e-2 | 2.42e-2 | 2.59e-2 | 6.73e-3 | 7.14e-3 | 4.92e-3 | 5.64e-3 | 5.56e-3   | 5.36e-3 | 5.06e-3 | 4.09e-3  | 5.90e-3 | 5.45e-3 |
| Pyrimidine | Mean: | 2.66e-2 | 8.79e-4 | 2.22e-2 | 8.47e-3 | 8.38e-3 | 4.02e-3 | 5.38e-3 | 4.55e-3   | 4.09e-3 | 3.74e-3 | 2.23e-3  | 5.24e-3 | 4.90e-3 |
|            | Std:  | 1.66e-3 | 2.98e-4 | 1.52e-3 | 2.24e-3 | 1.84e-3 | 1.15e-3 | 1.60e-3 | 1.52e-3   | 1.30e-3 | 1.08e-3 | 3.59e-4  | 2.00e-3 | 1.58e-3 |
|            | Max:  | 2.96e-2 | 1.35e-3 | 2.50e-2 | 1.10e-2 | 1.04e-2 | 5.42e-3 | 7.22e-3 | 6.32e-3   | 5.60e-3 | 4.99e-3 | 2.74e-3  | 7.59e-3 | 6.86e-3 |
|            | Min:  | 2.42e-2 | 4.28e-4 | 1.97e-2 | 5.12e-3 | 5.63e-3 | 2.53e-3 | 3.12e-3 | 2.56e-3   | 2.46e-3 | 2.34e-3 | 1.65e-3  | 2.65e-3 | 2.77e-3 |
| Pyrazine   | Mean: | 2.56e-2 | 4.29e-3 | 2.22e-2 | 1.44e-2 | 1.39e-2 | 9.18e-3 | 1.06e-2 | 9.76e-3   | 9.22e-3 | 9.08e-3 | 6.46e-3  | 1.12e-2 | 1.02e-2 |
|            | Std:  | 1.37e-3 | 5.66e-4 | 1.22e-3 | 2.66e-3 | 2.17e-3 | 1.66e-3 | 2.09e-3 | 2.10e-3   | 1.85e-3 | 1.69e-3 | 8.79e-4  | 2.69e-3 | 2.16e-3 |
|            | Max:  | 2.80e-2 | 5.22e-3 | 2.45e-2 | 1.75e-2 | 1.63e-2 | 1.11e-2 | 1.28e-2 | 1.20e-2   | 1.12e-2 | 1.09e-2 | 7.64e-3  | 1.43e-2 | 1.28e-2 |
|            | Min:  | 2.36e-2 | 3.36e-3 | 2.02e-2 | 1.05e-2 | 1.07e-2 | 7.04e-3 | 7.59e-3 | 6.93e-3   | 6.82e-3 | 6.75e-3 | 5.22e-3  | 7.54e-3 | 7.24e-3 |



## C Basis Set Performance Plots

All basis set performance plots from the 'Basis Set Analysis' section are given in the following pages. The figures are arranged, such that plots of the same property are listed together. The basis sets are listed along the horizontal axis, and the corresponding property is given on the vertical axis. The electronic structure methods are colored, and the color codes are to be found to the right of each plot. The associated molecule is specified in the parentheses in top of each plot as well as the examined property.

### C.1 HOMA Index

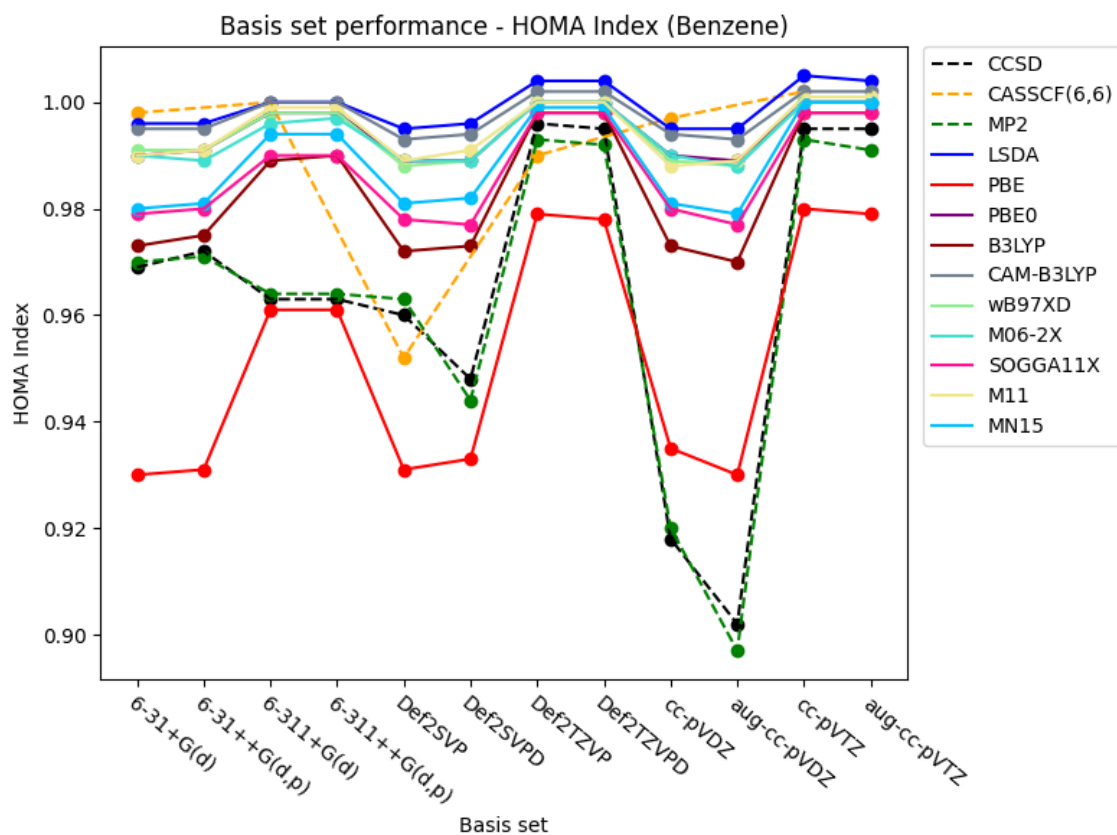

Basis set performance - HOMA Index (Pyridine)

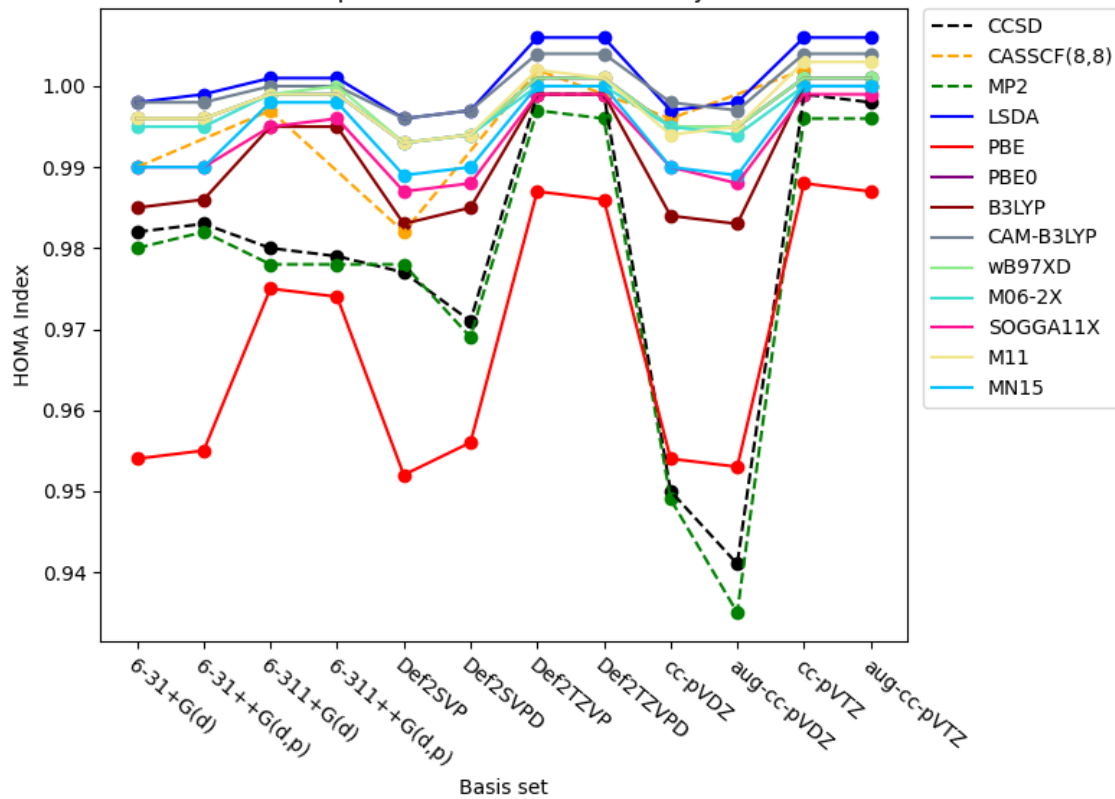

Basis set performance - HOMA Index (Pyridazine)

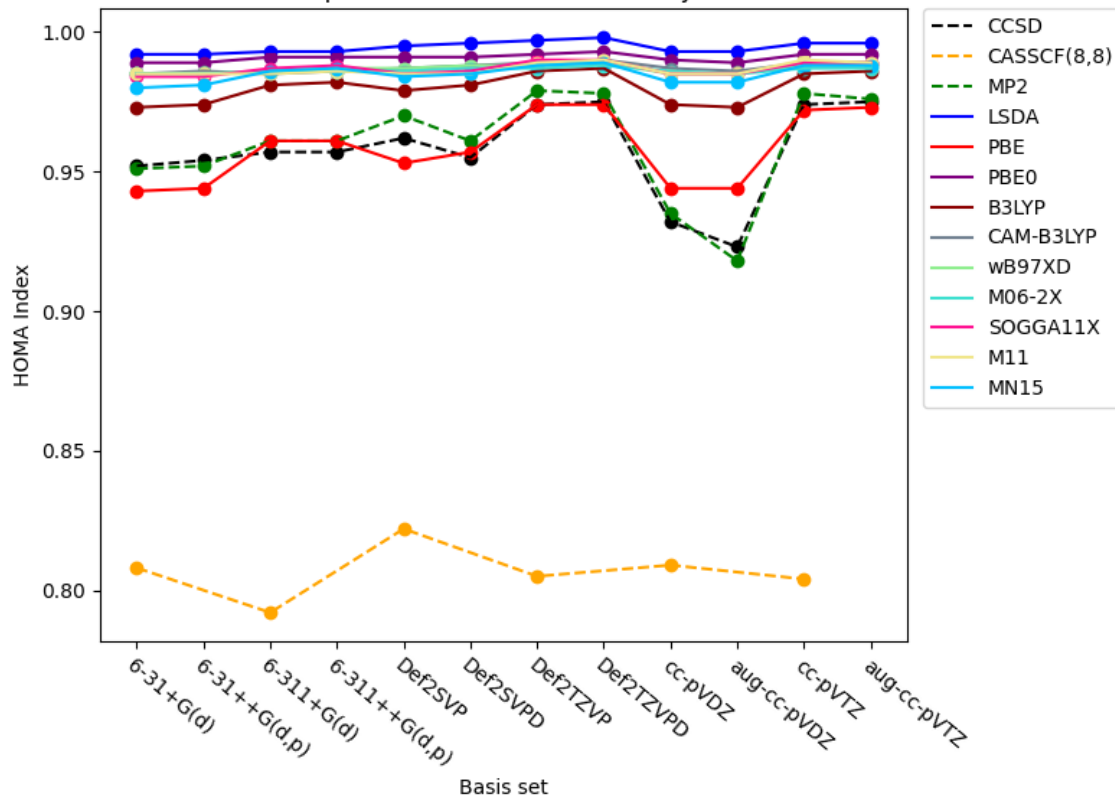

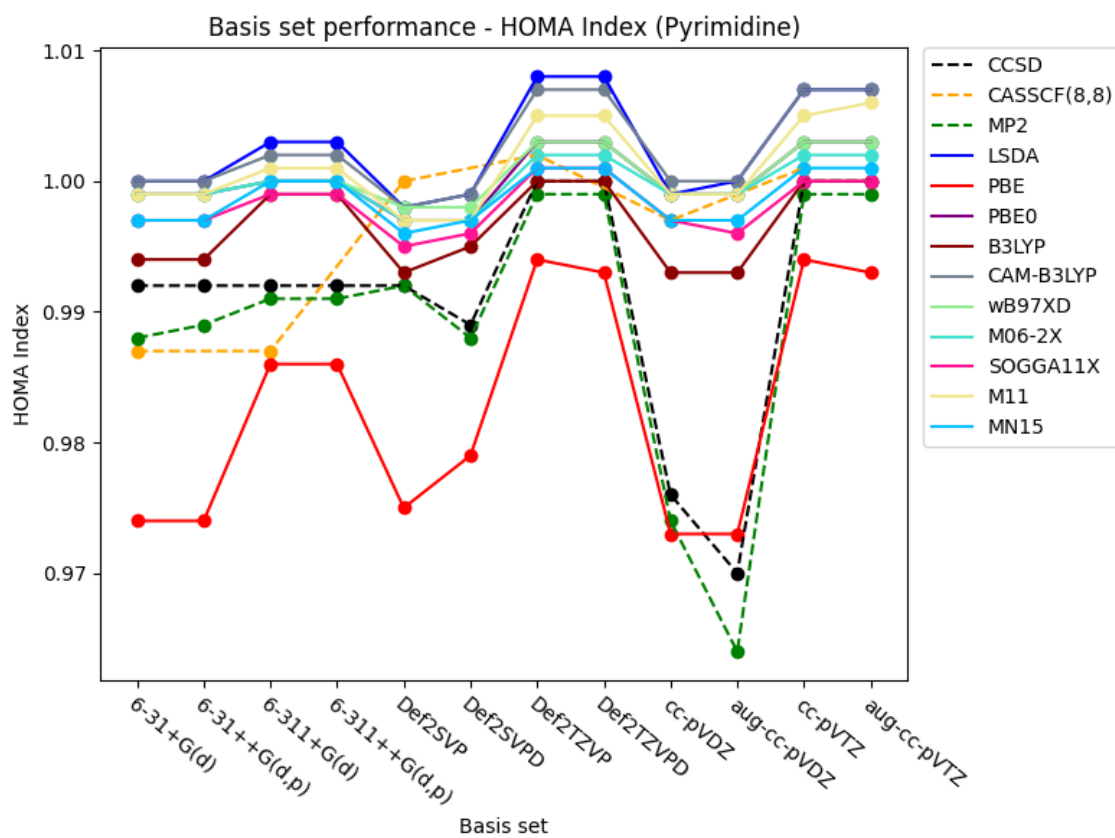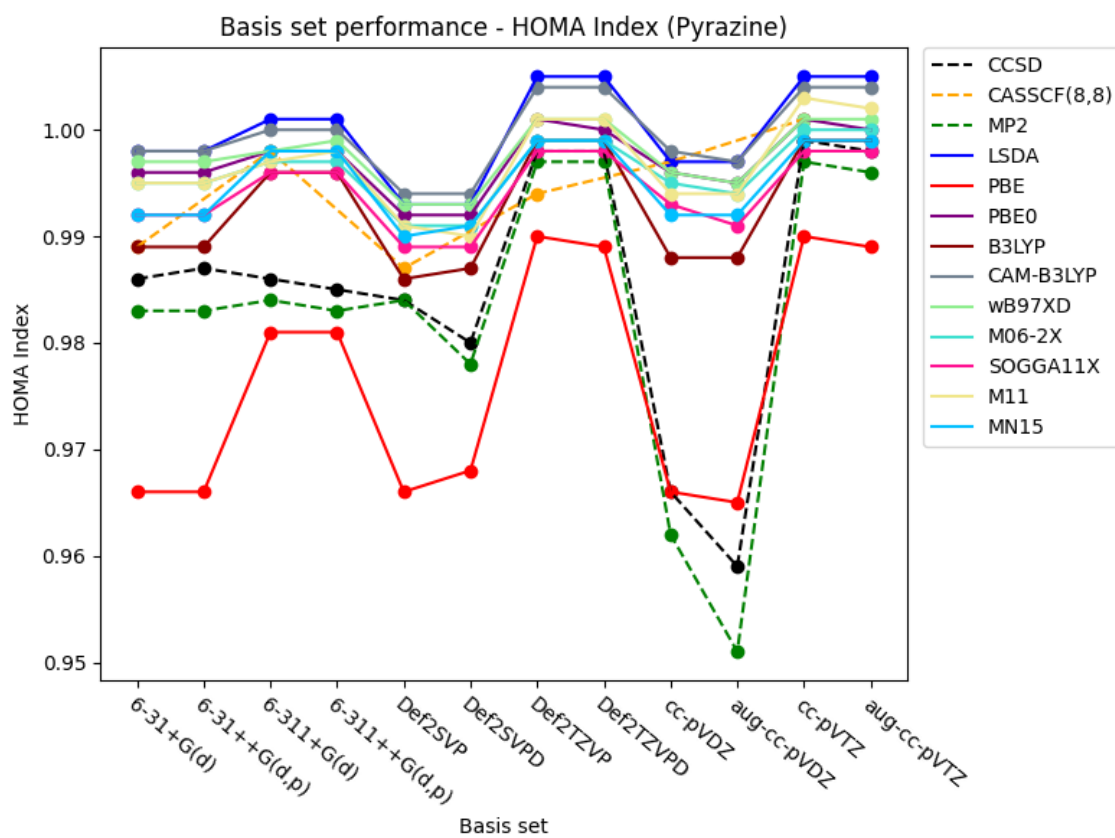

## C.2 PDI

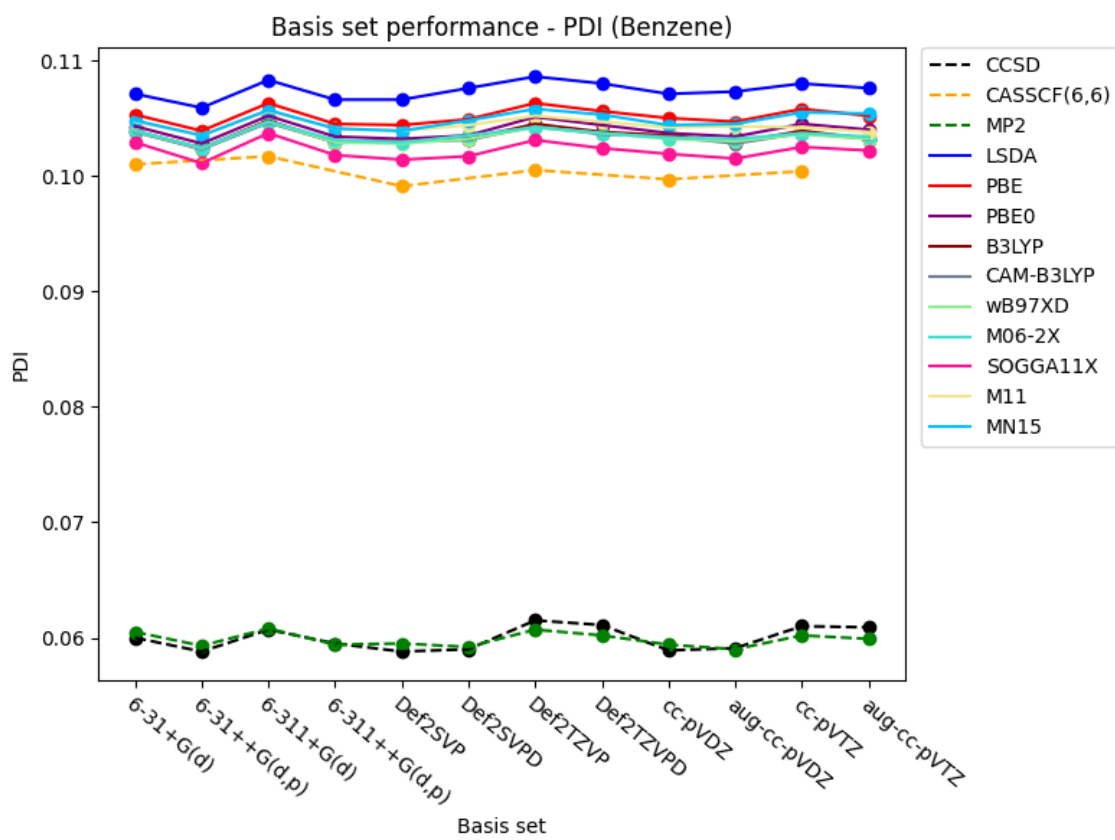

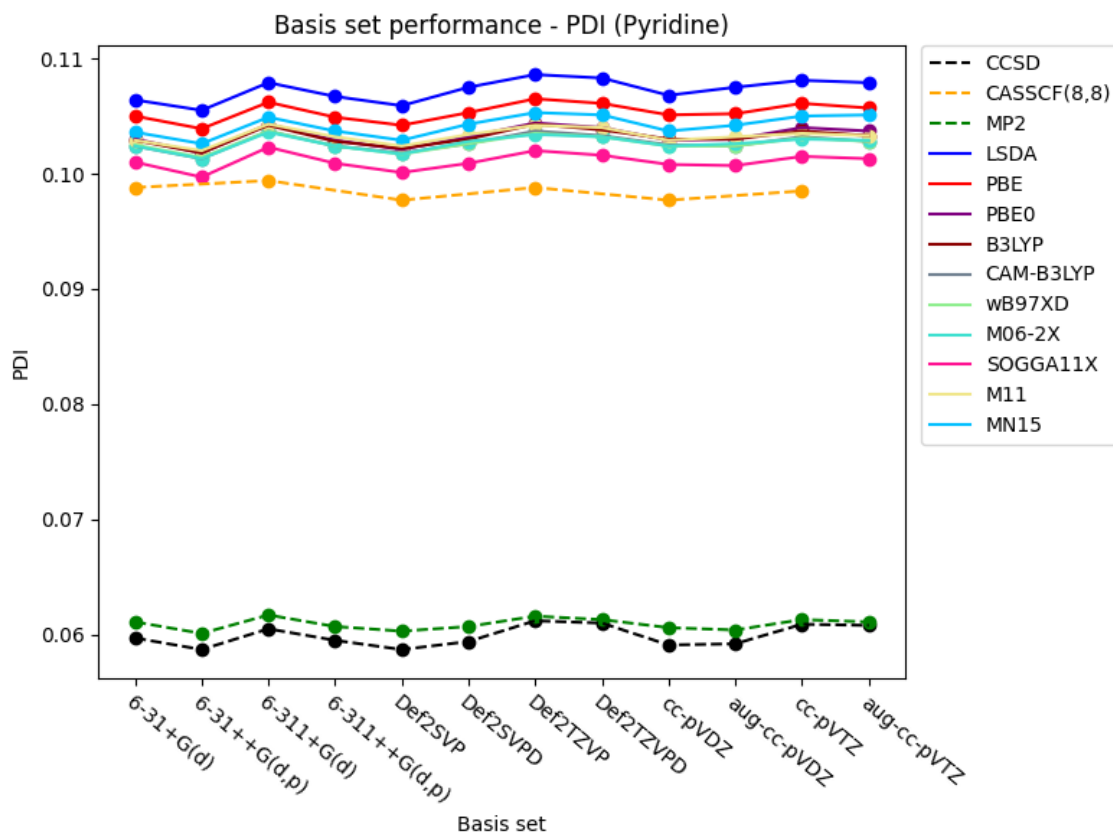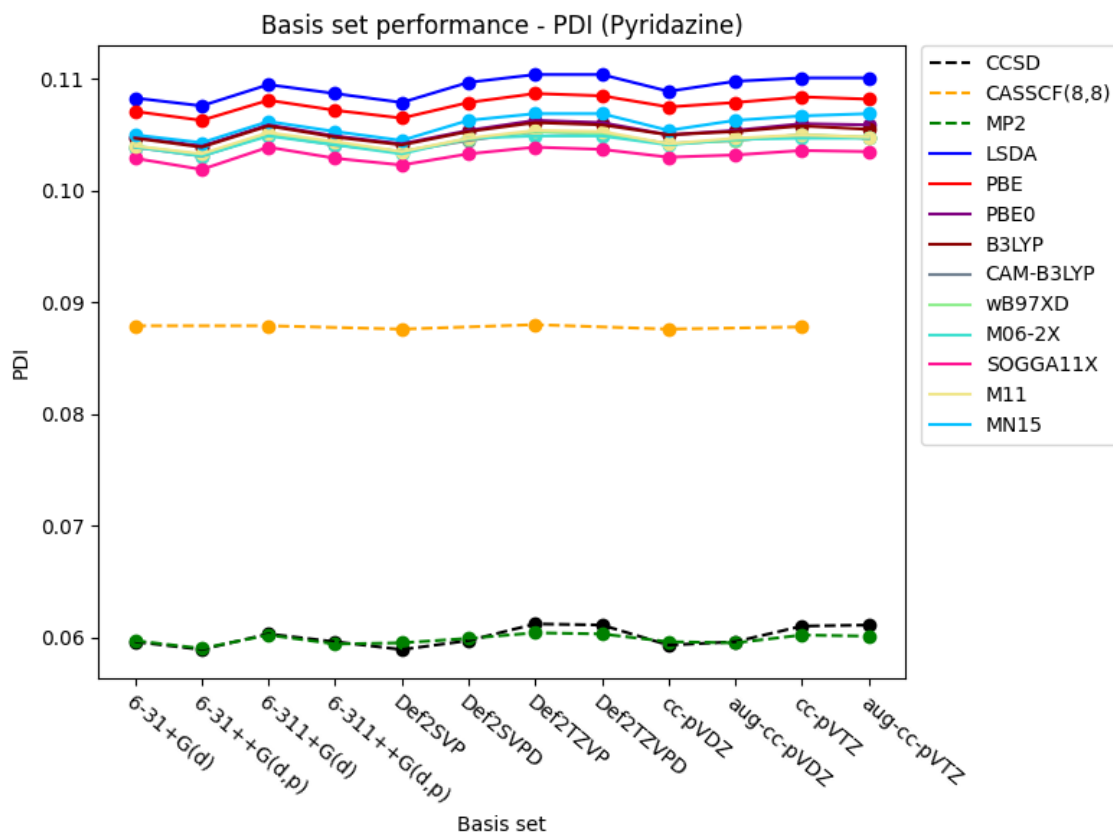

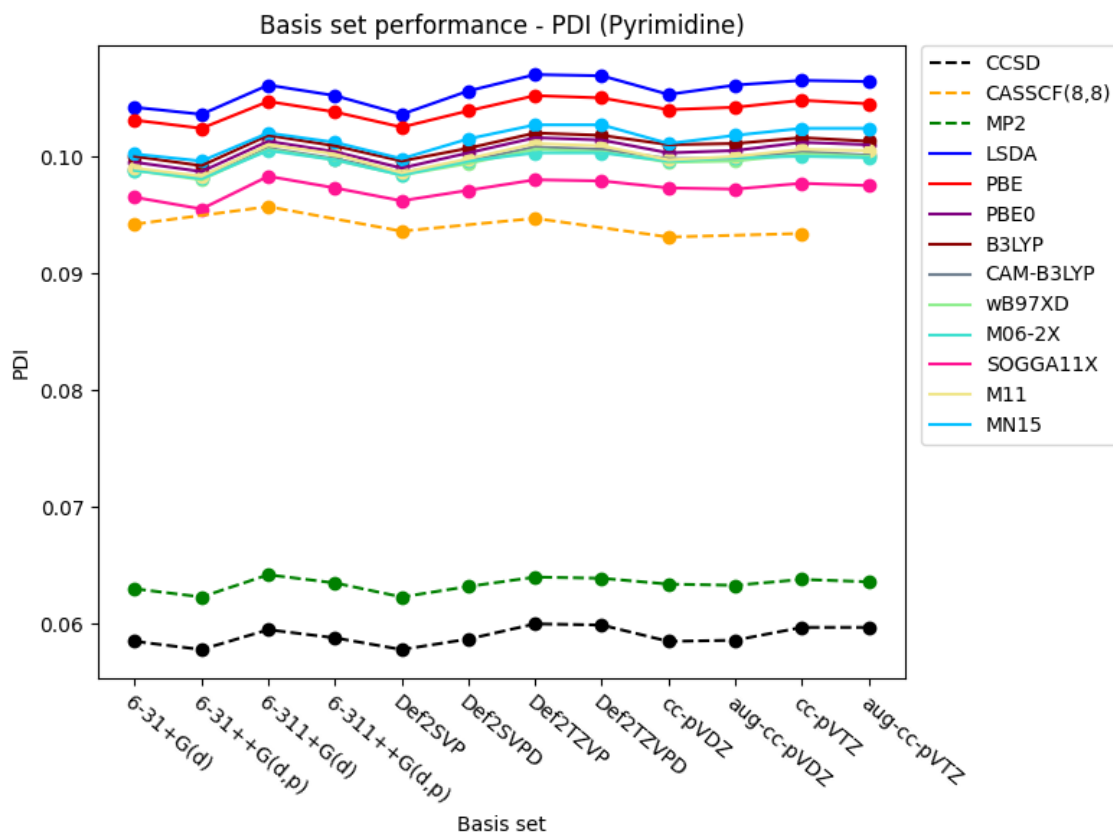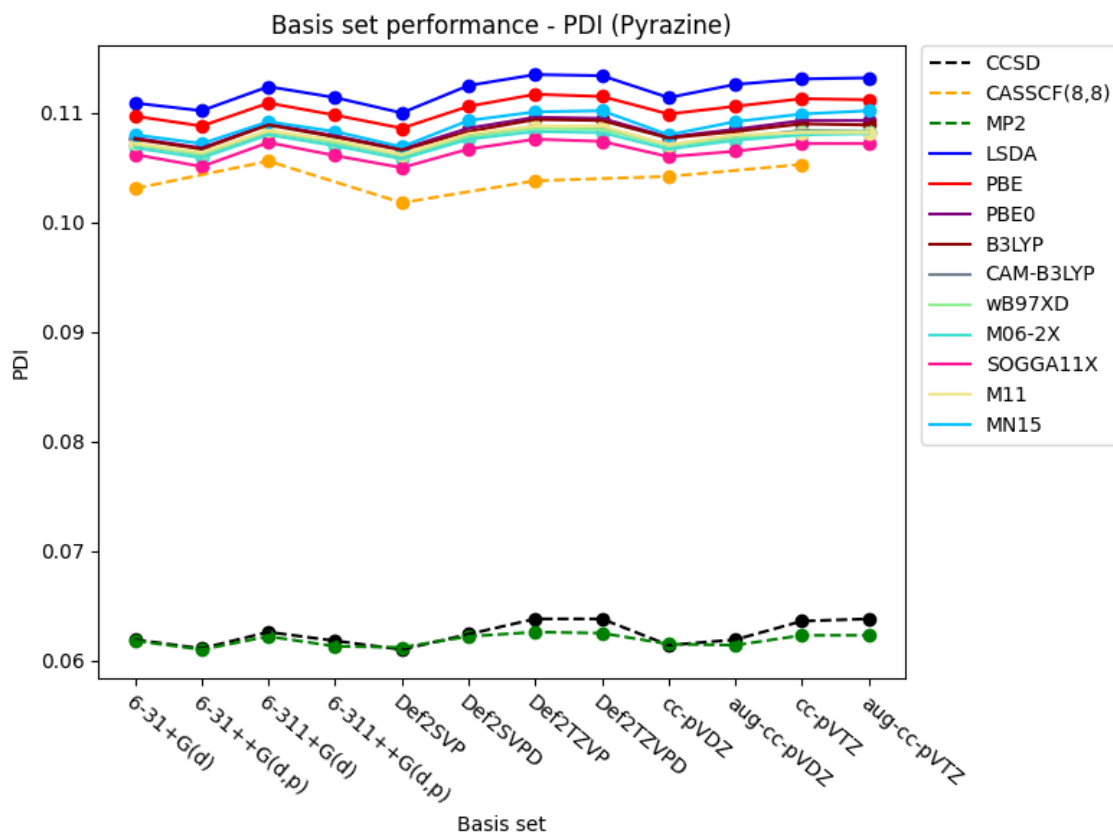

### C.3 MCI

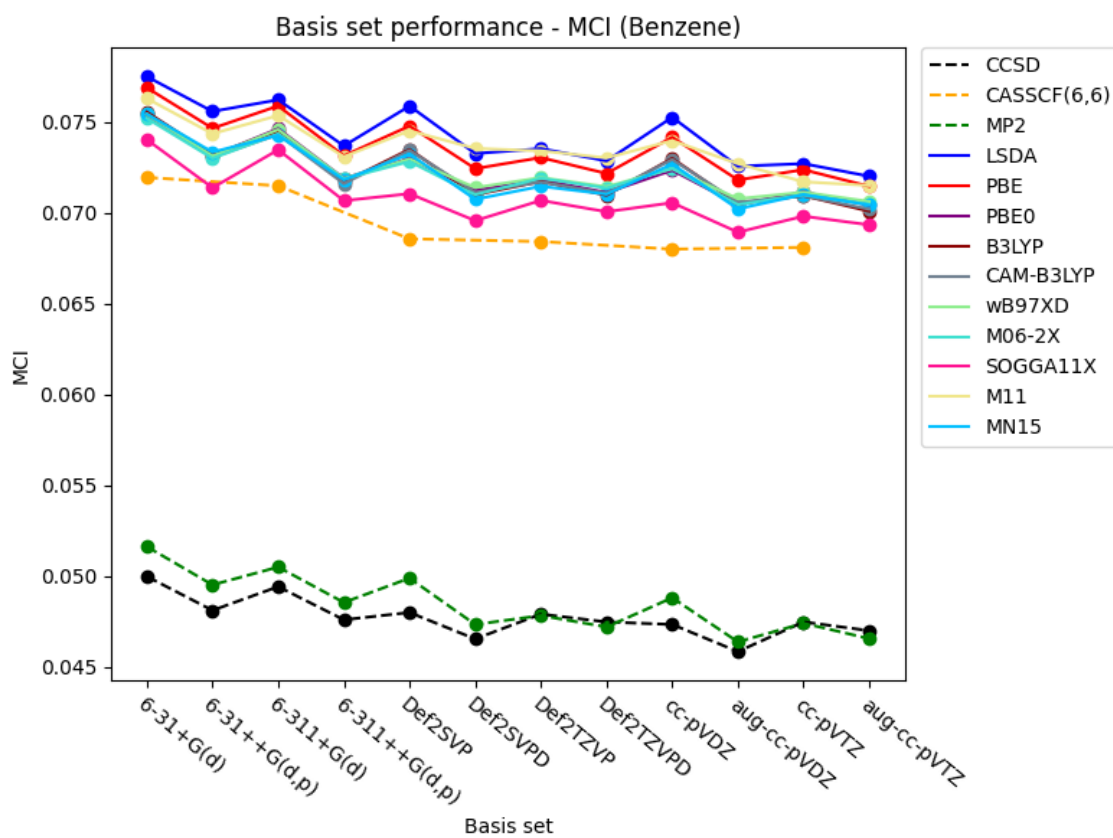

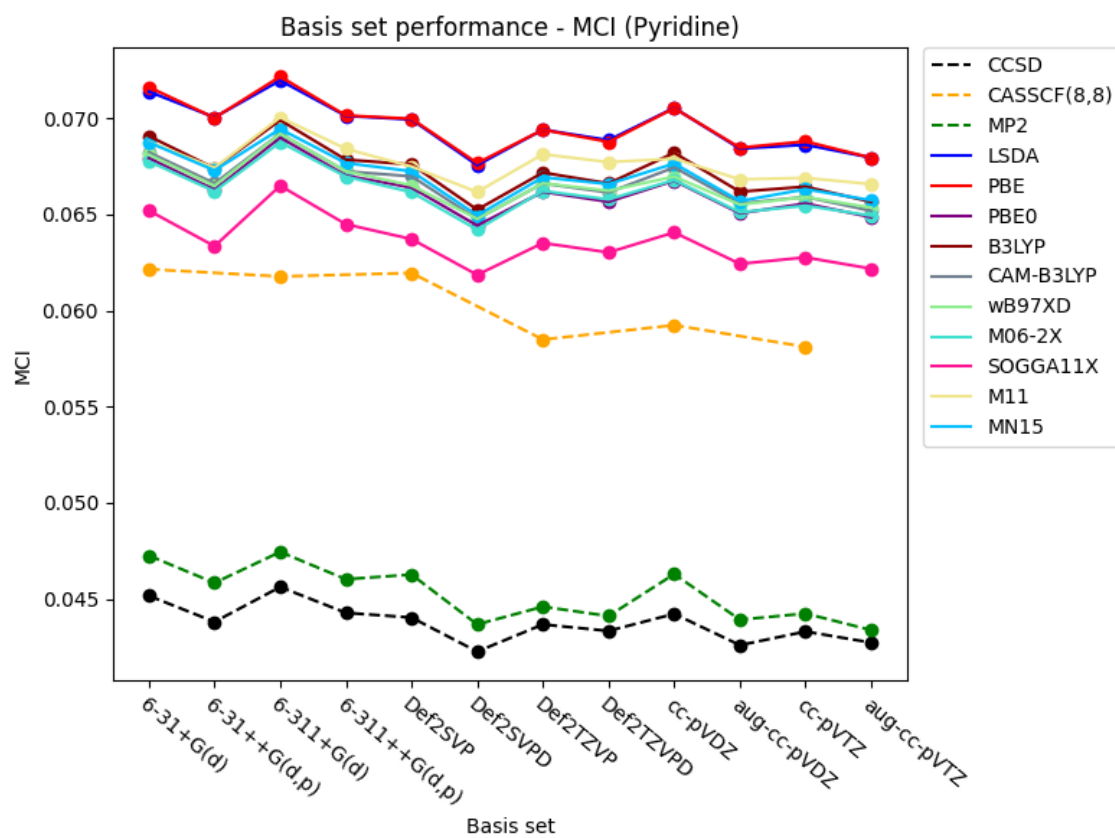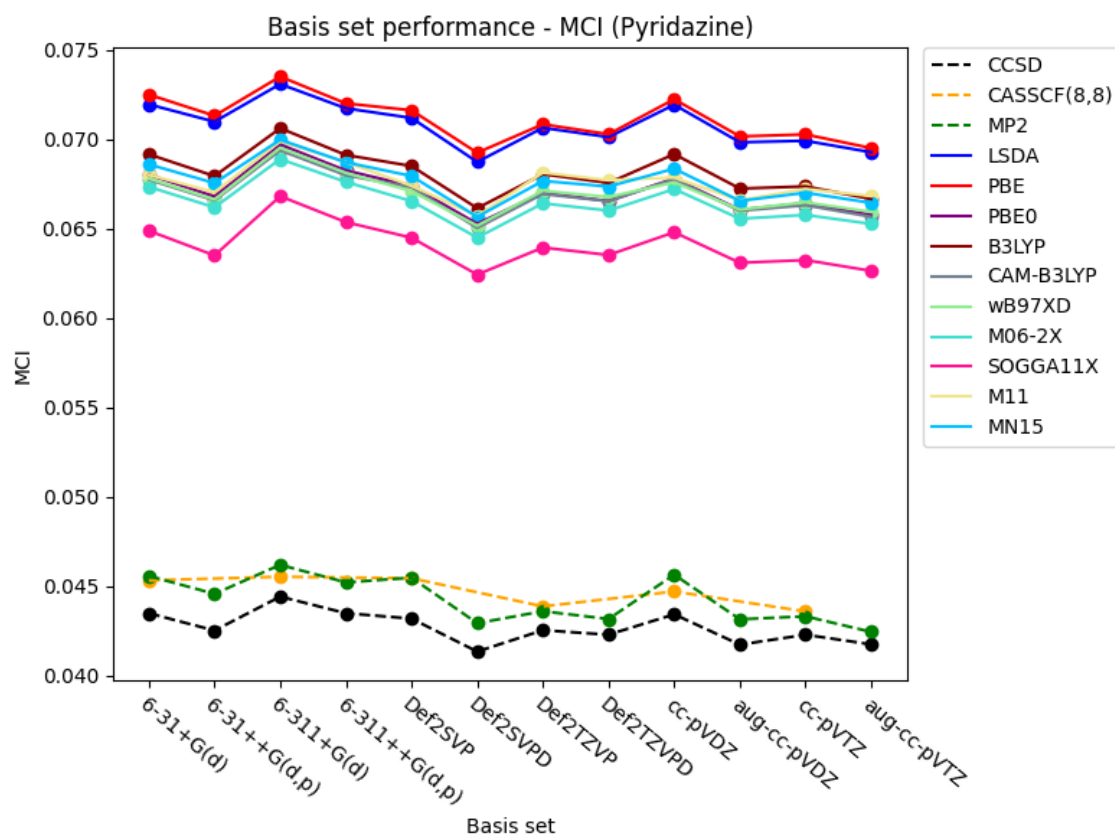



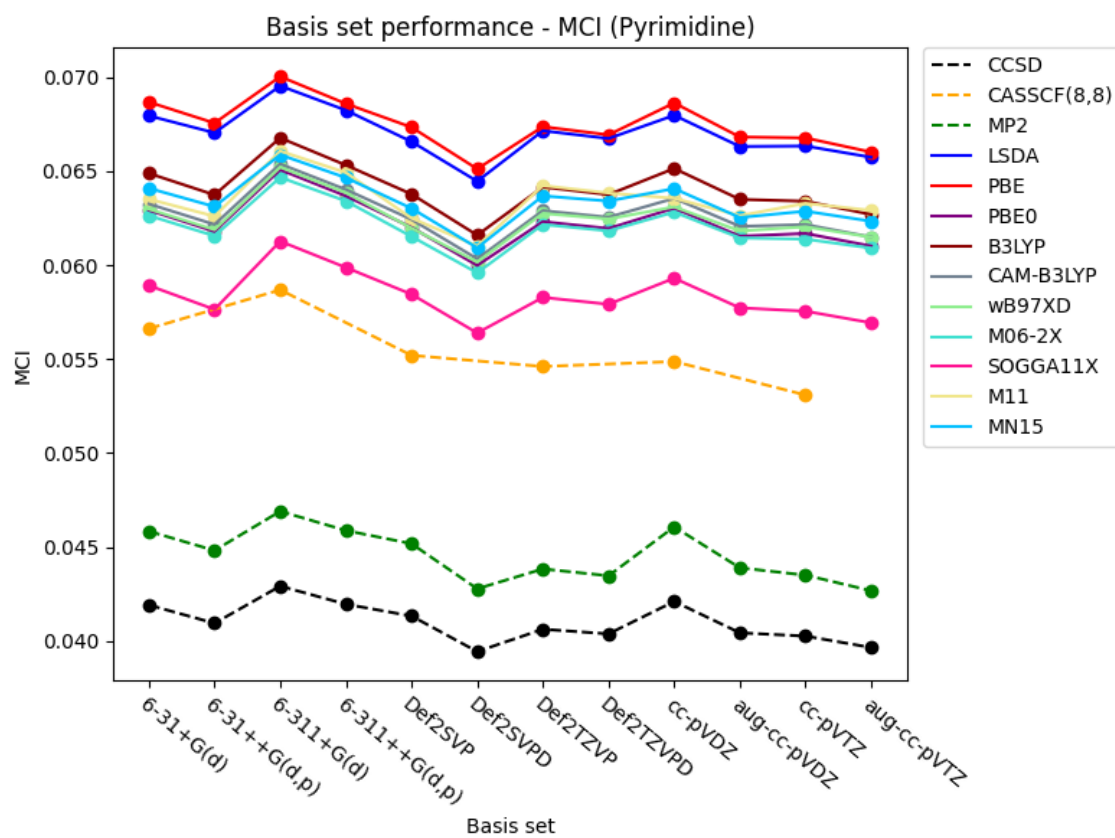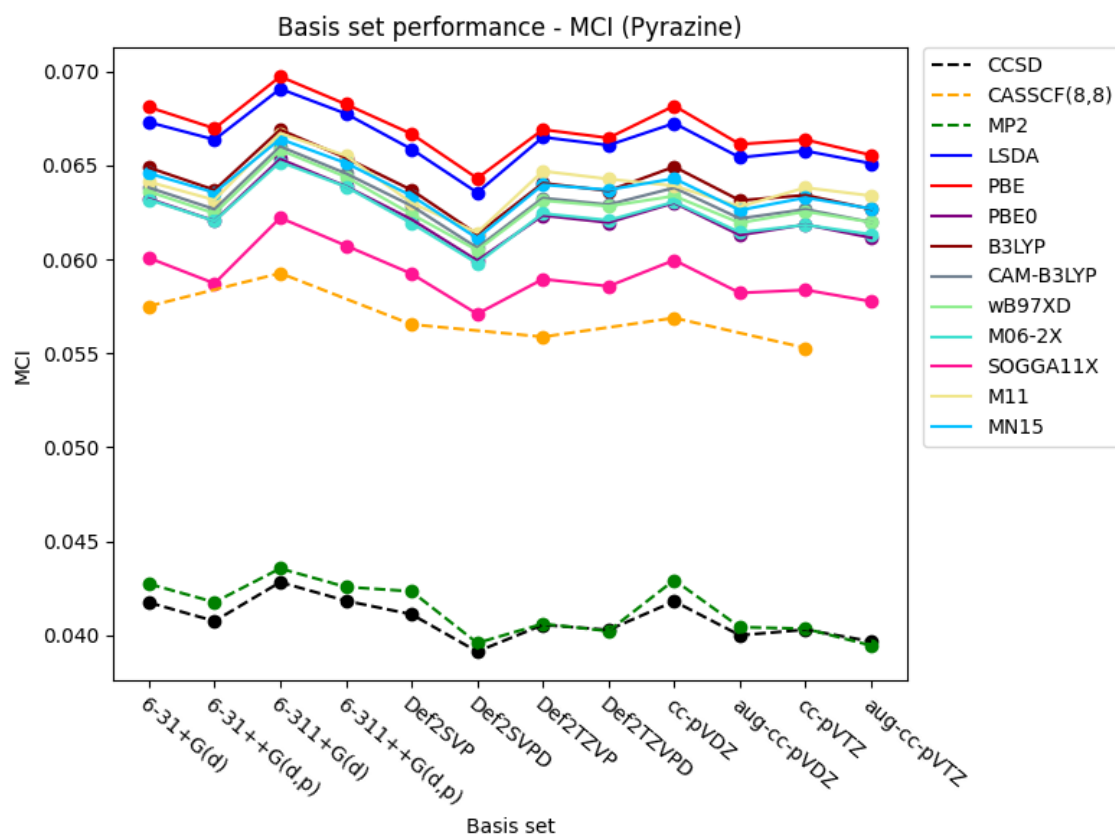

## C.4 AV1245 Index

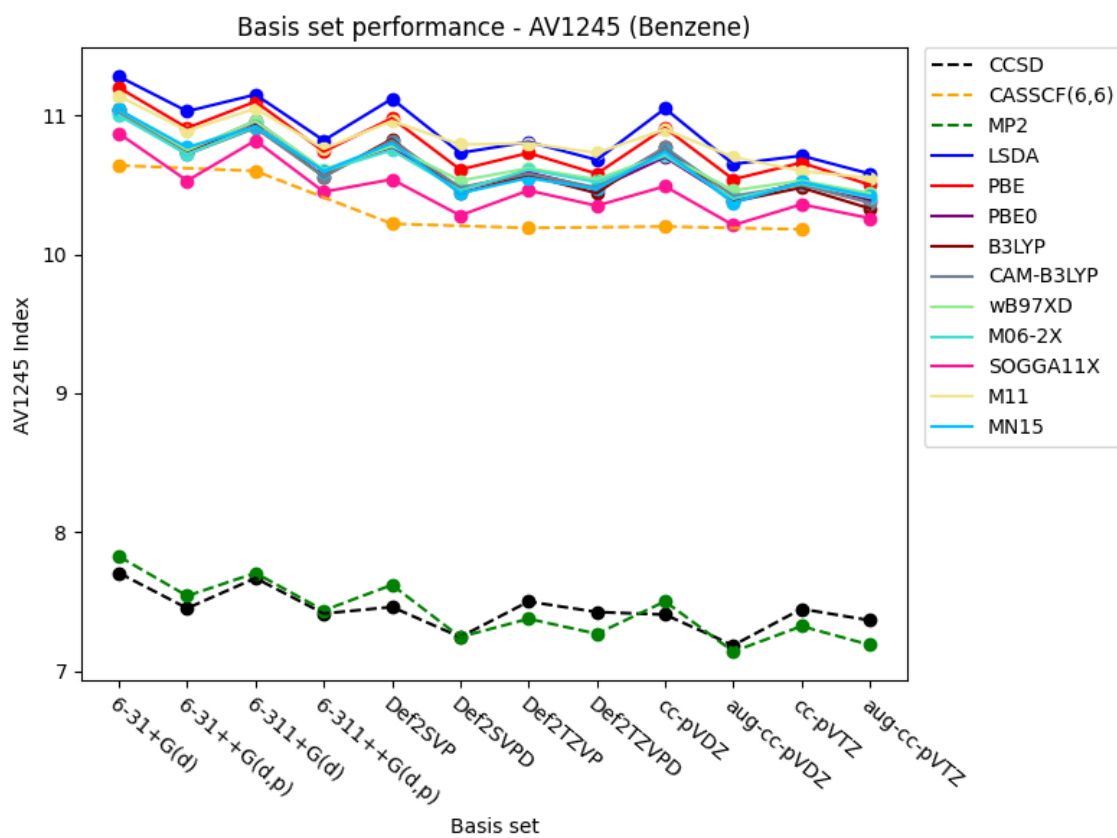

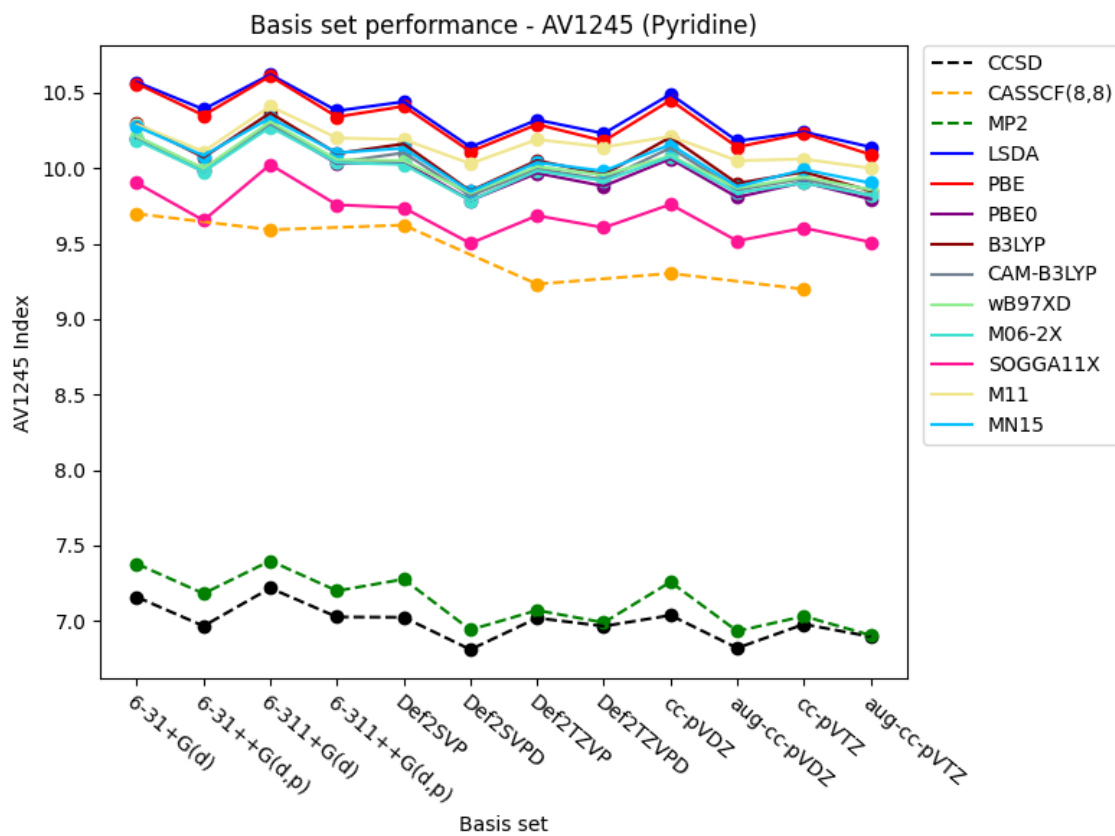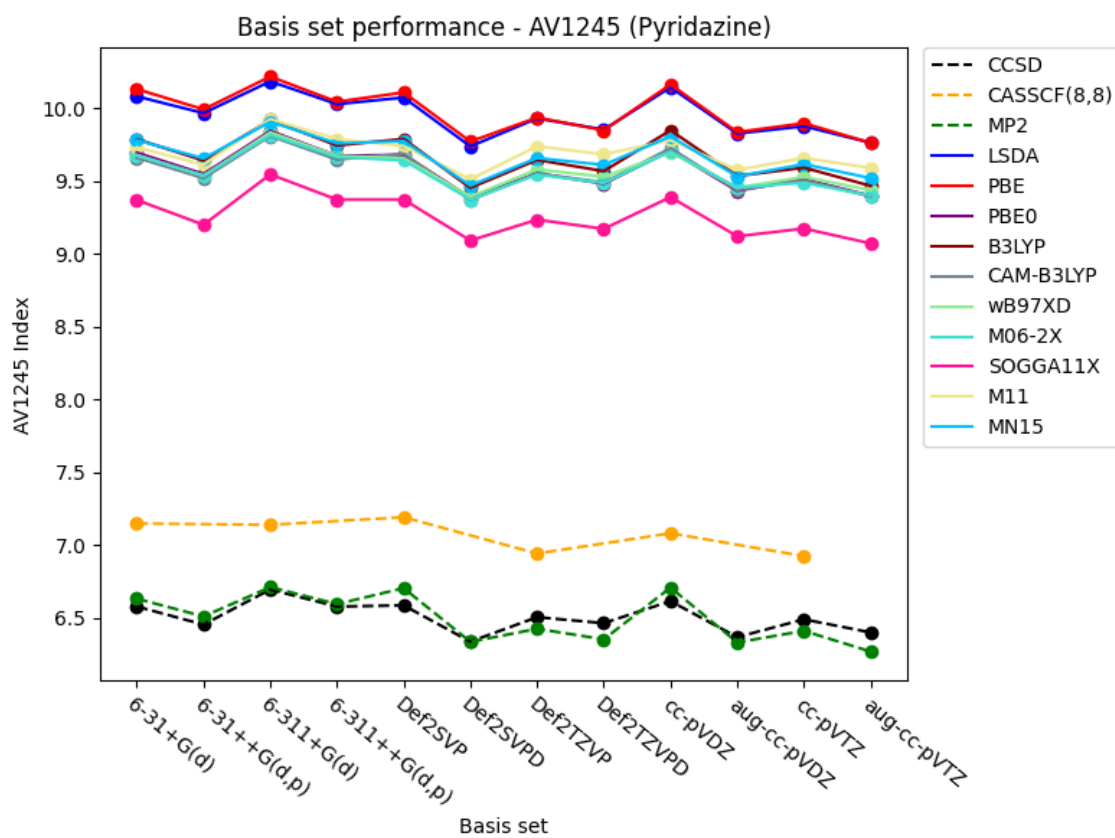

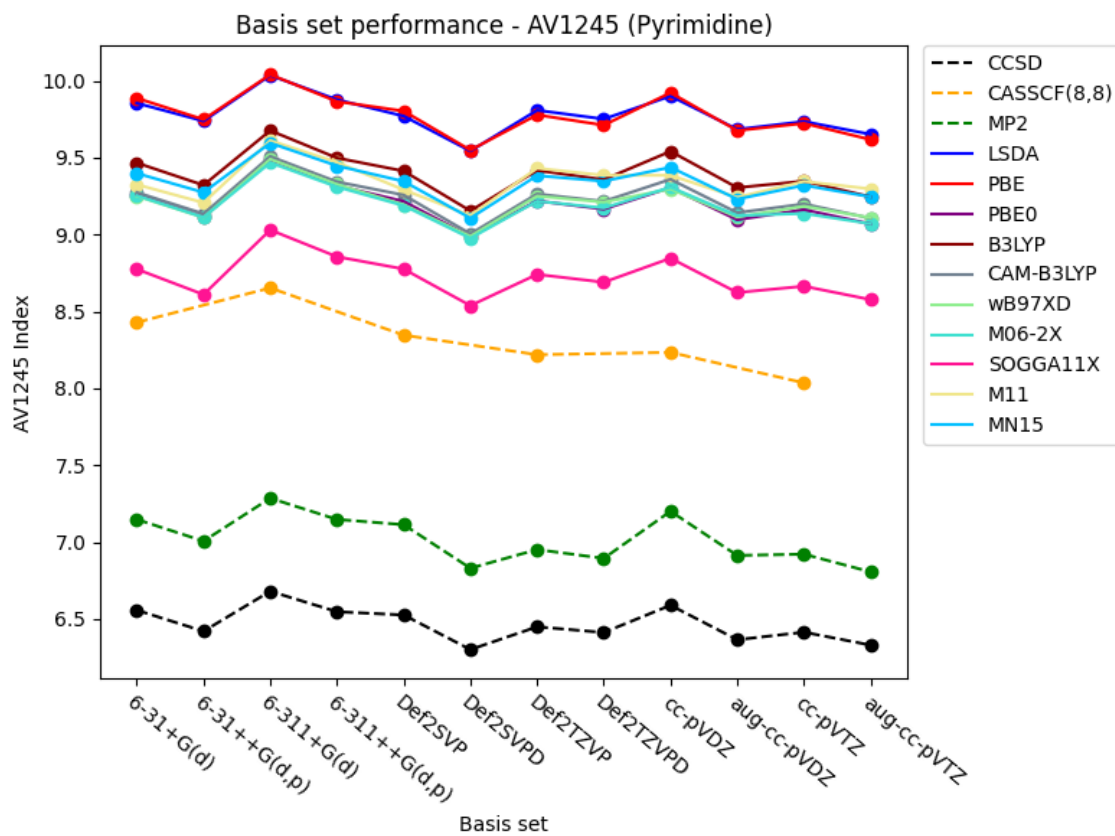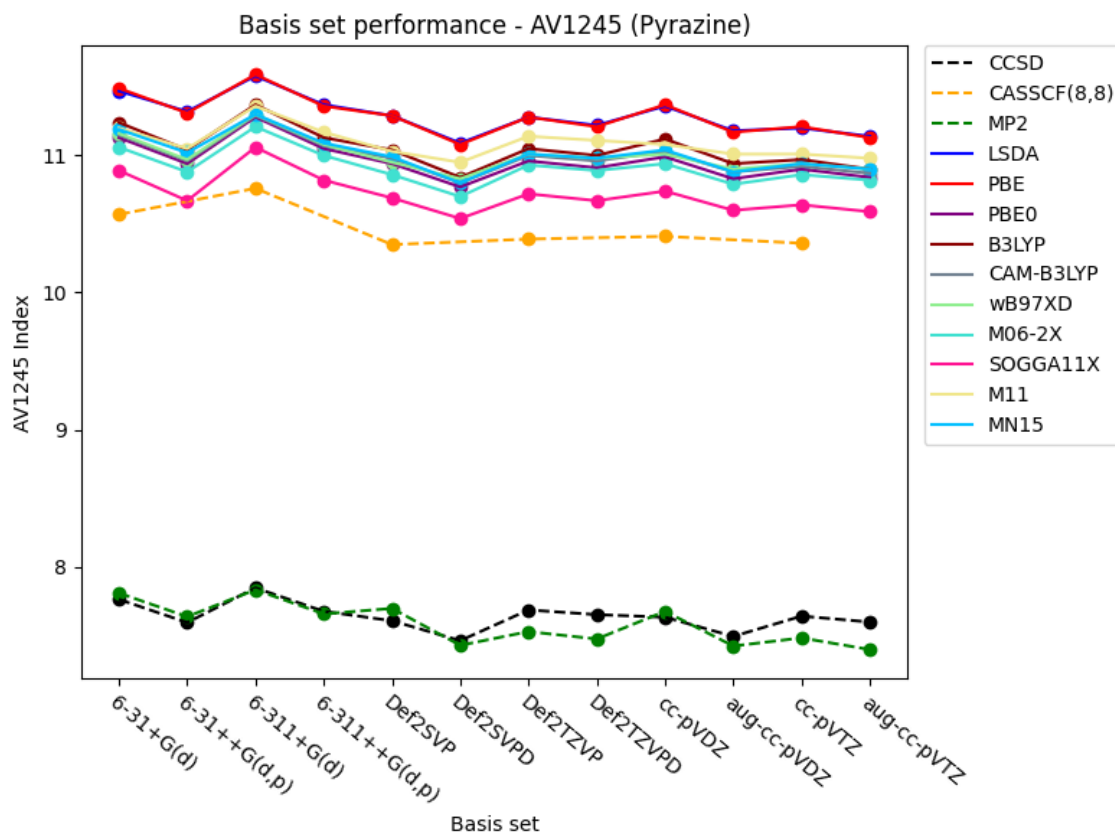

## C.5 FLU Index

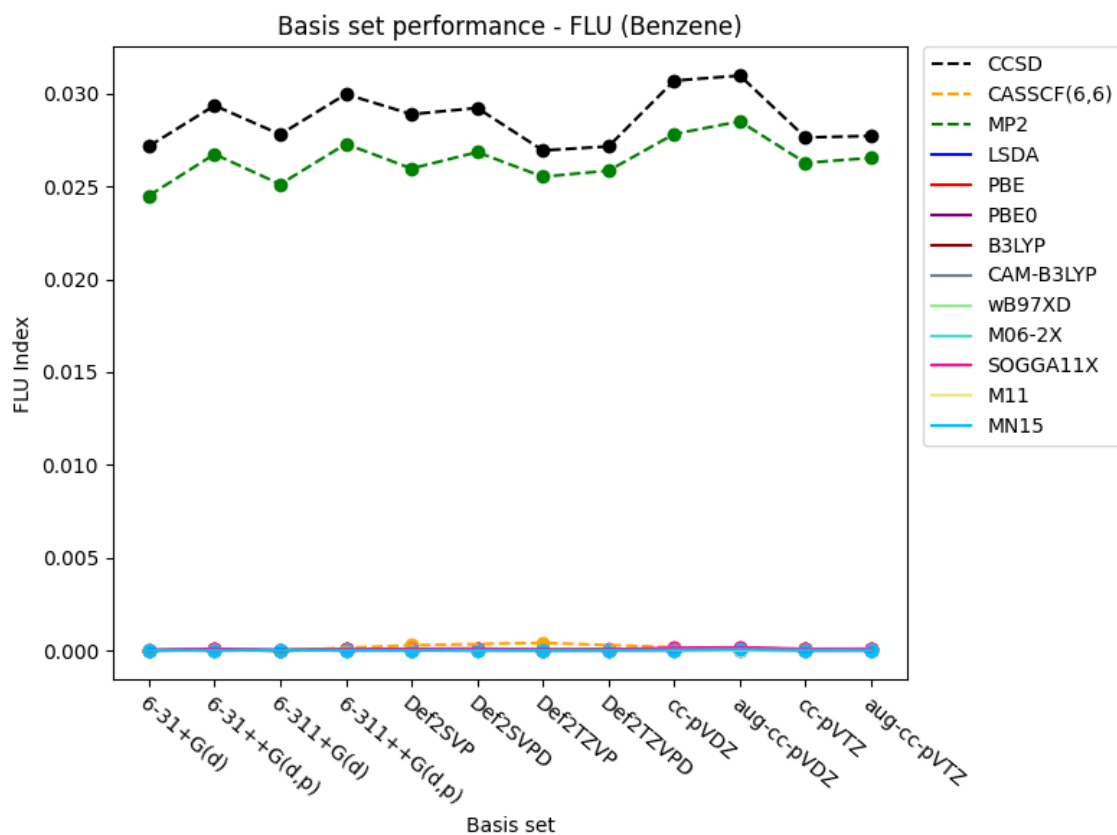

The following is a zoom-in of the figure above:

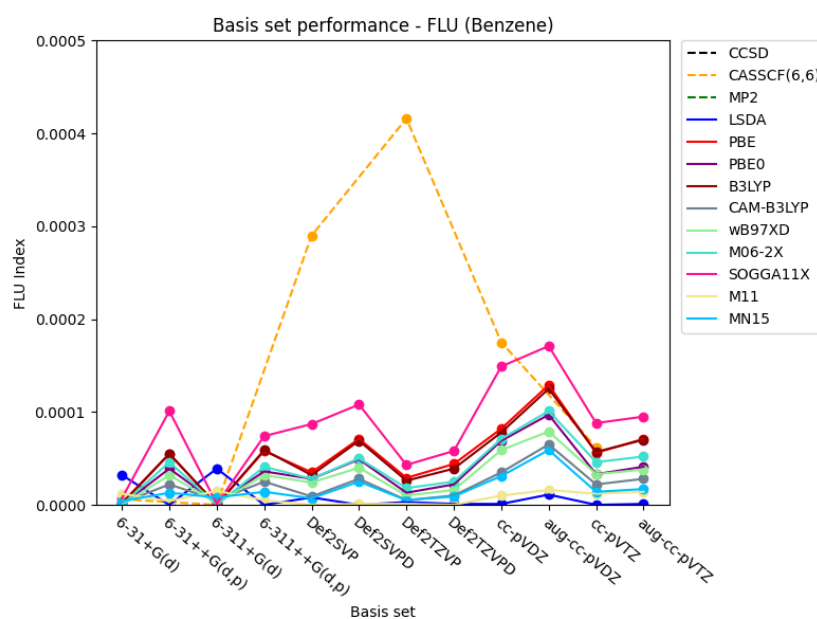

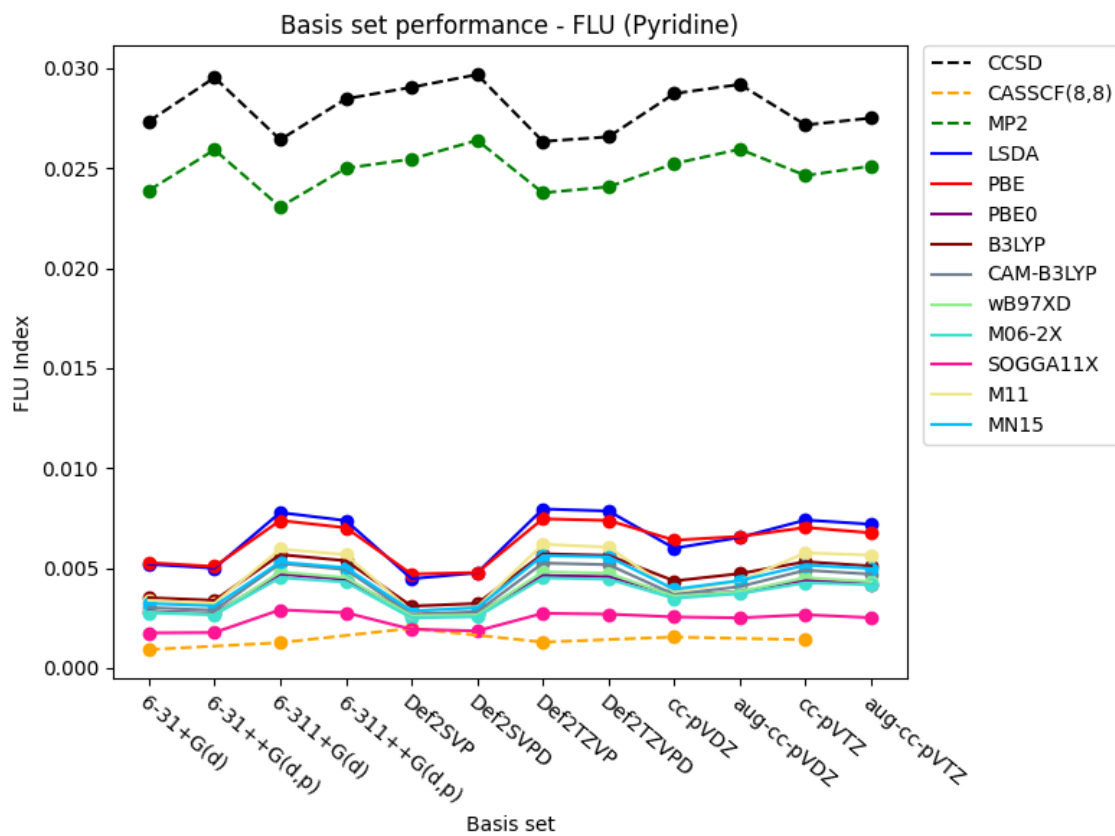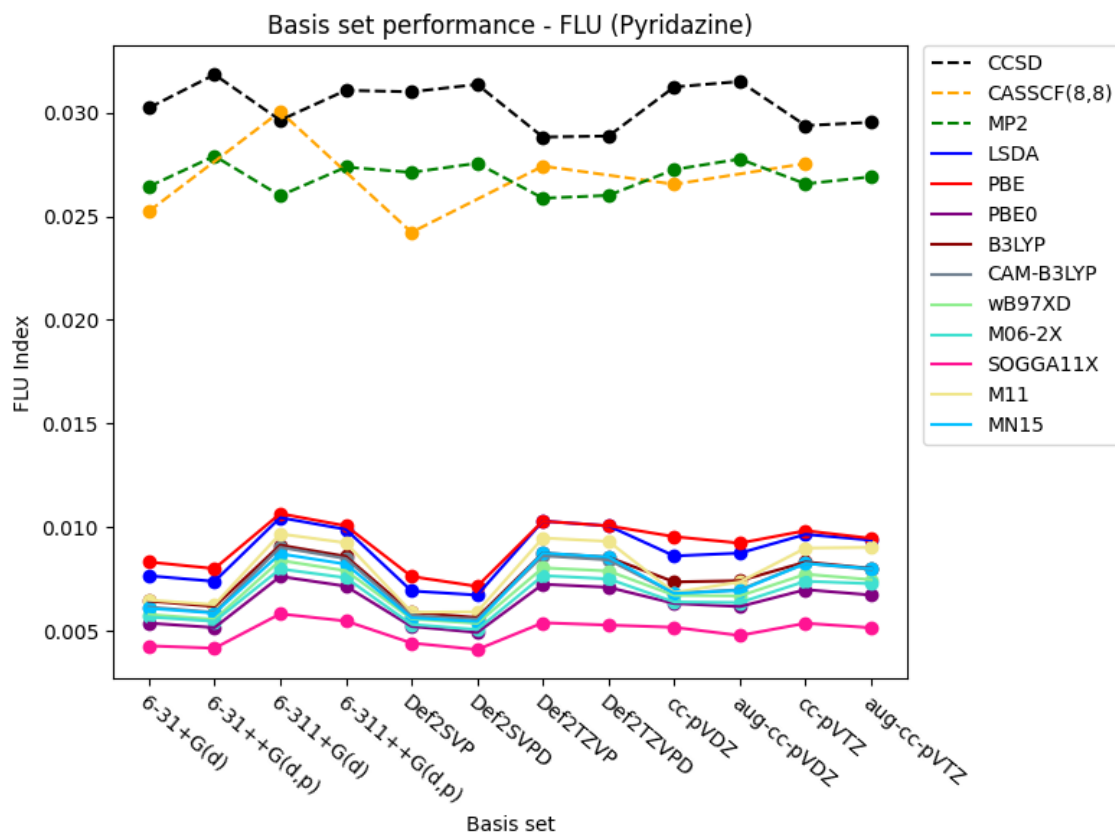

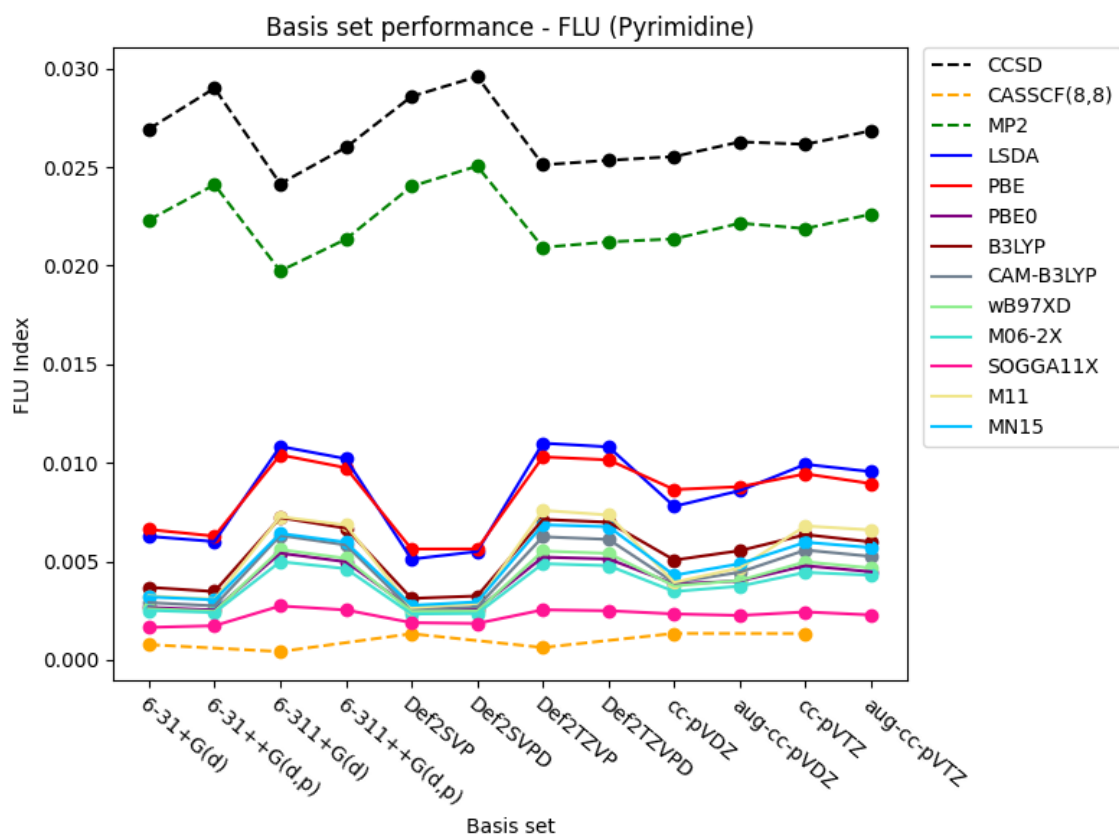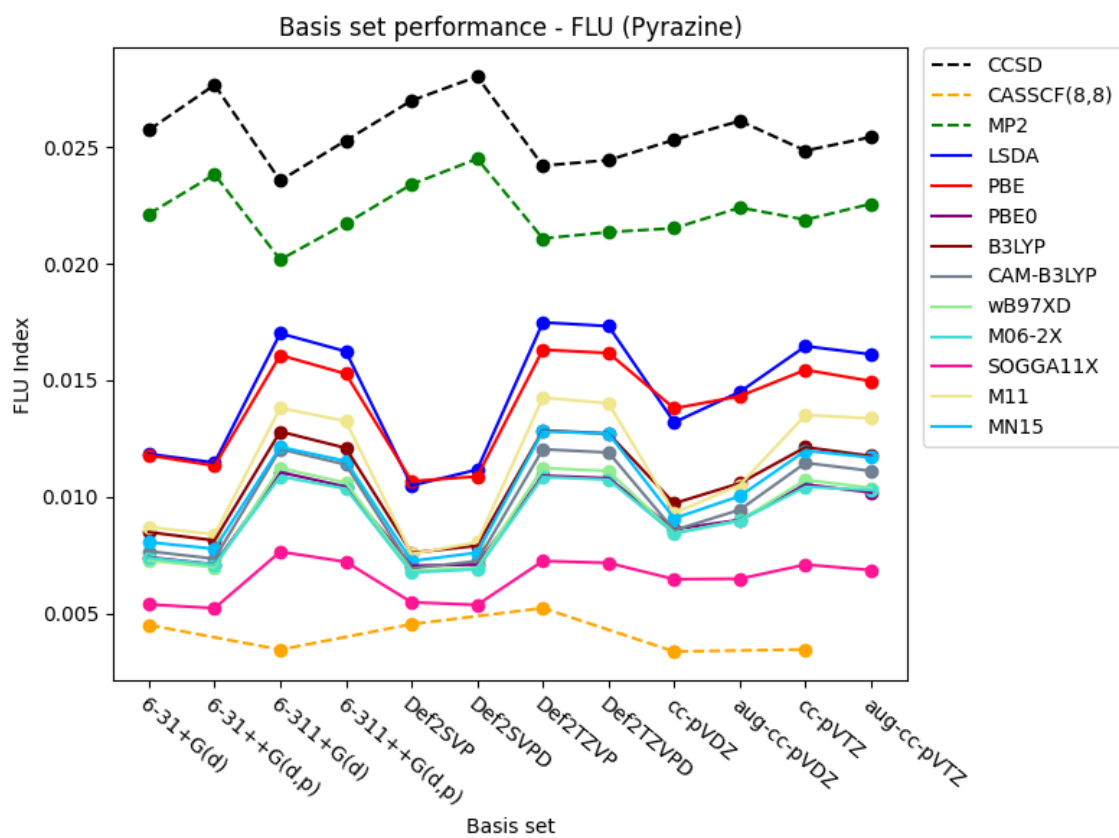

## C.6 Electronic Energy

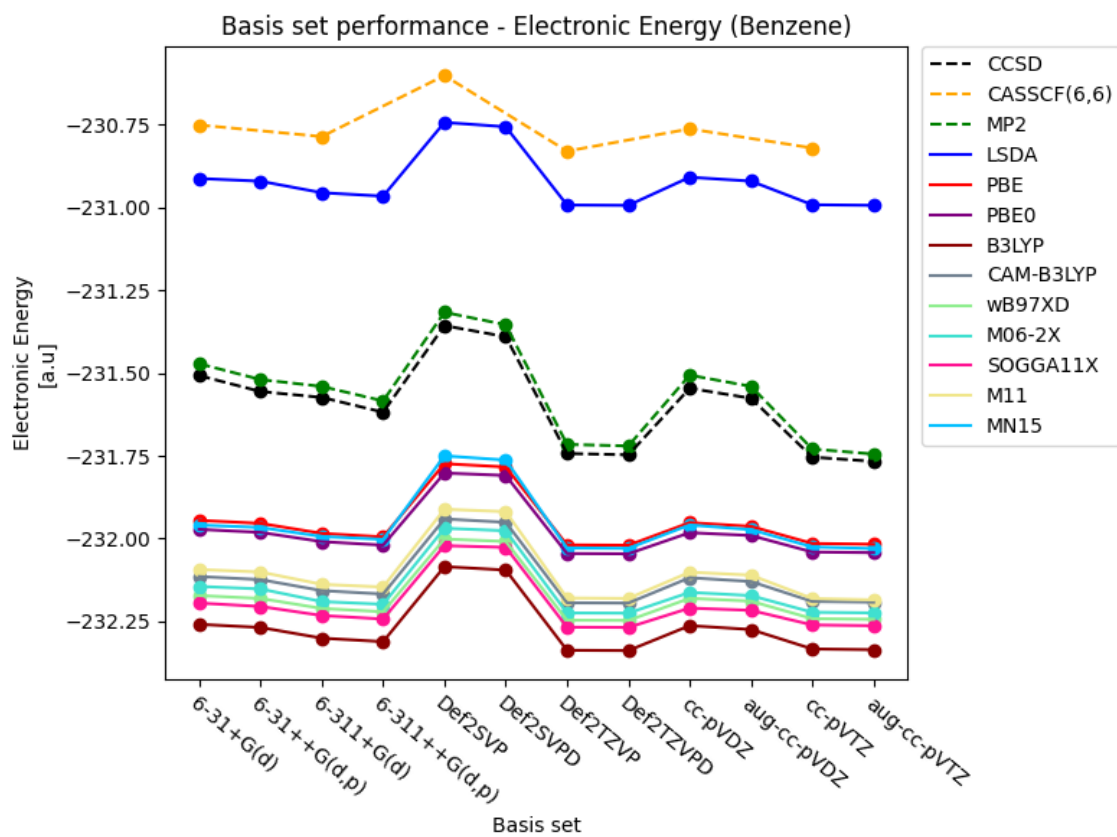



Basis set performance - Electronic Energy (Pyridine)

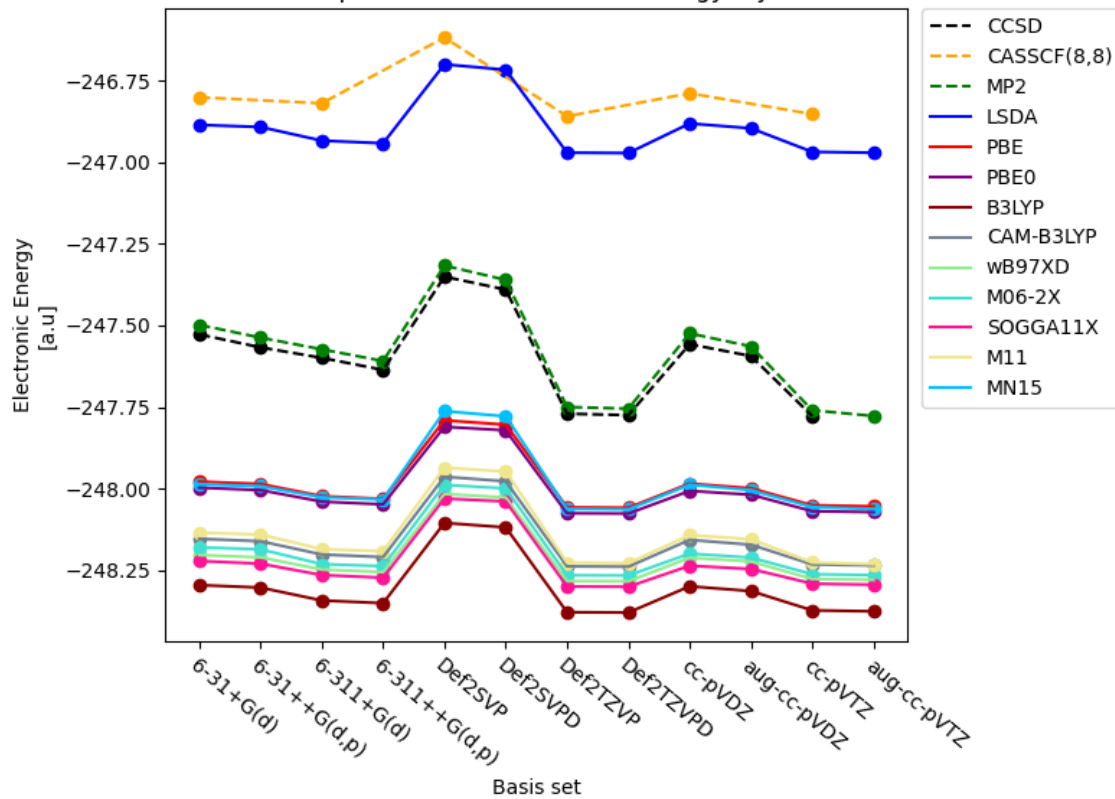

Basis set performance - Electronic Energy (Pyridazine)

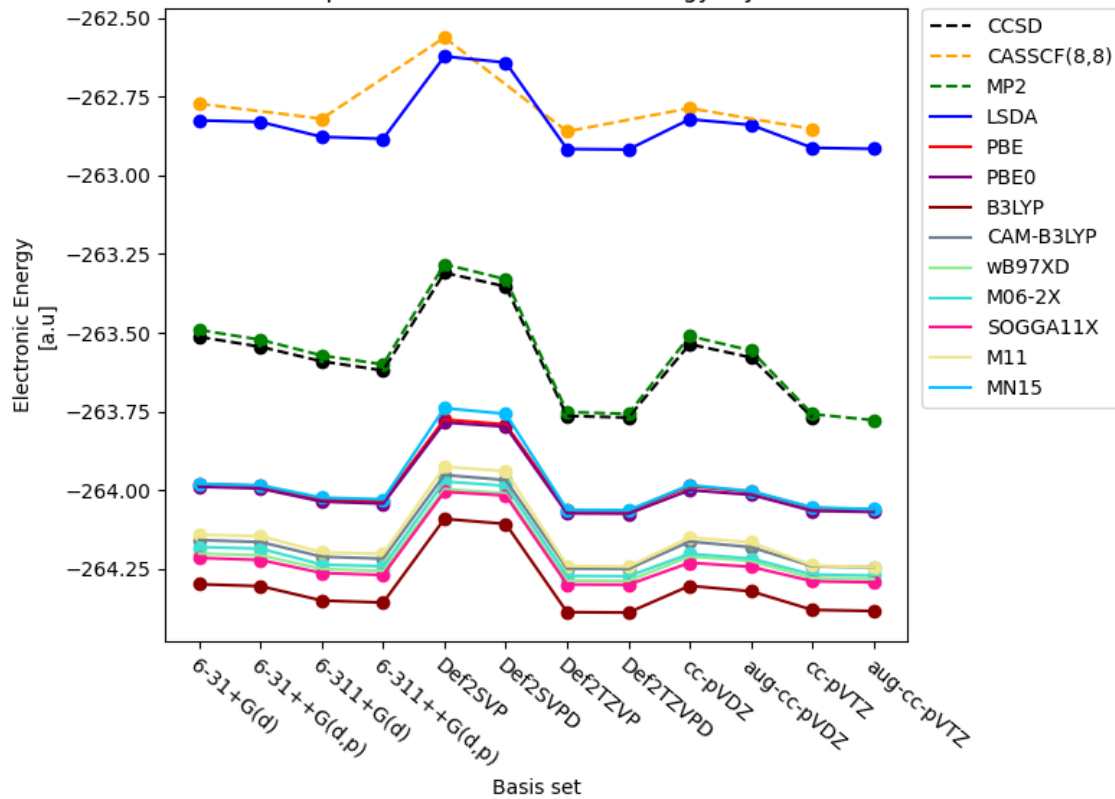

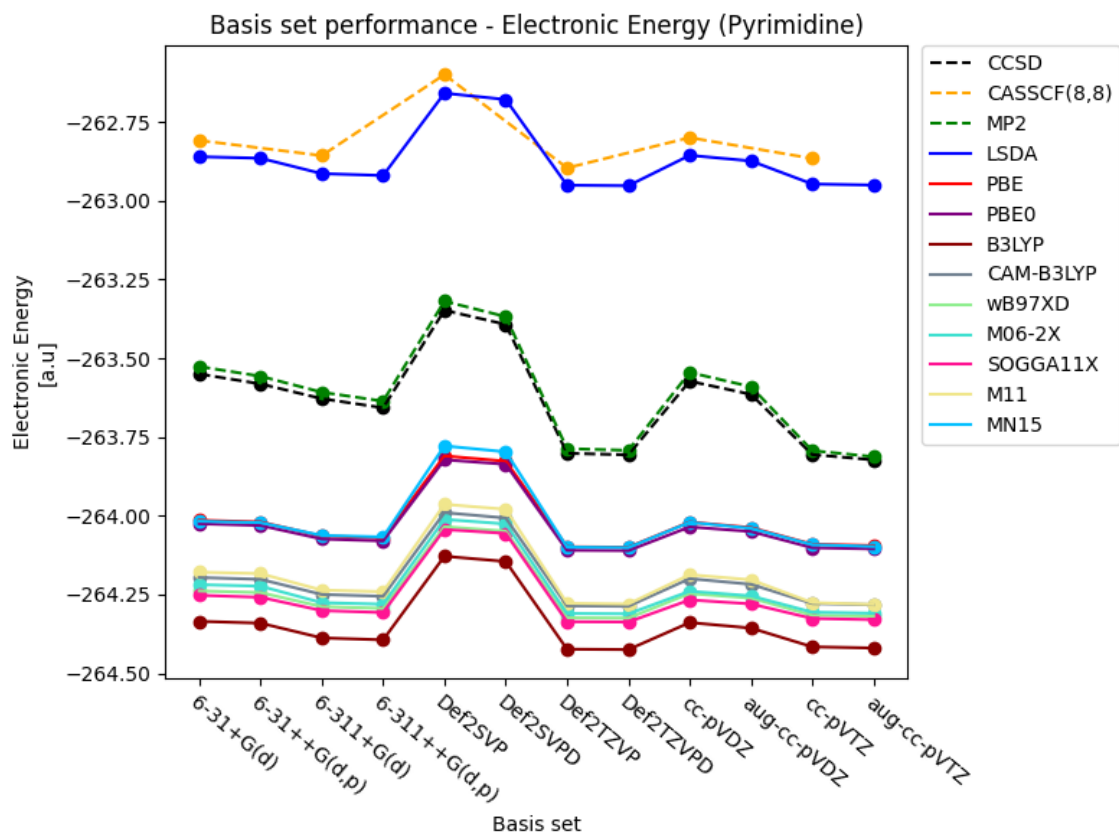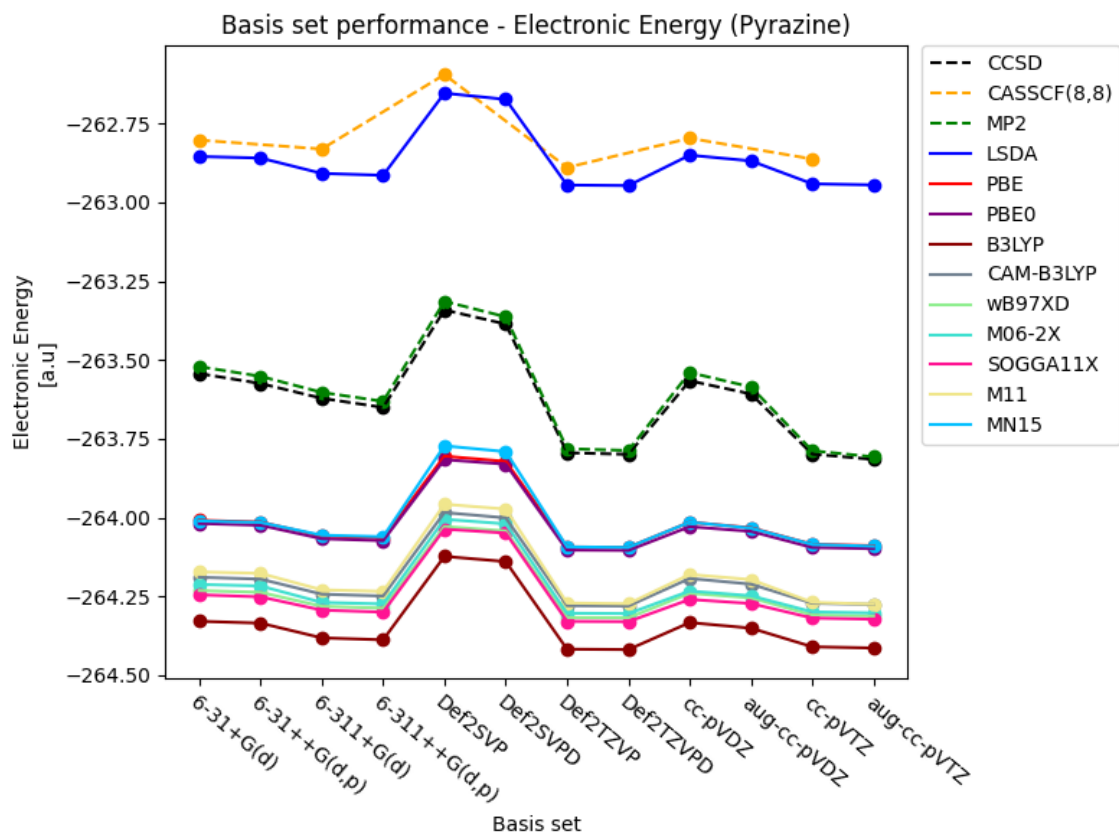

## C.7 Zero Point Energy

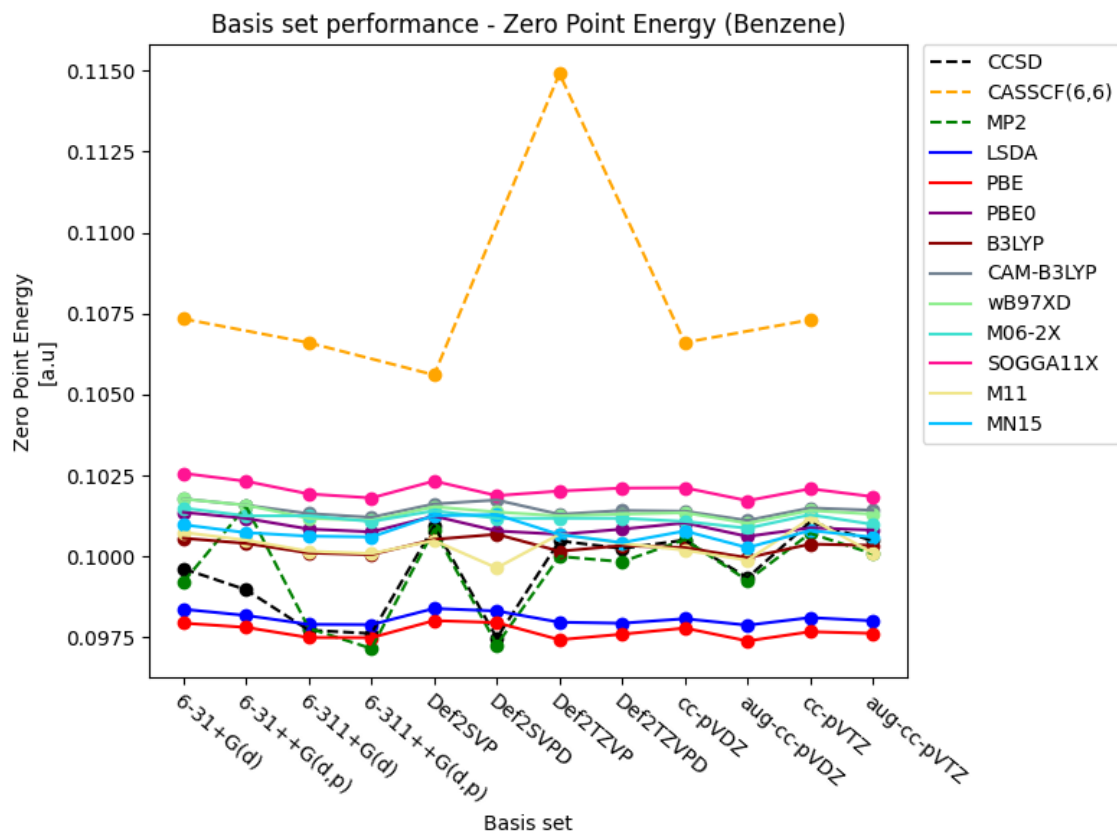

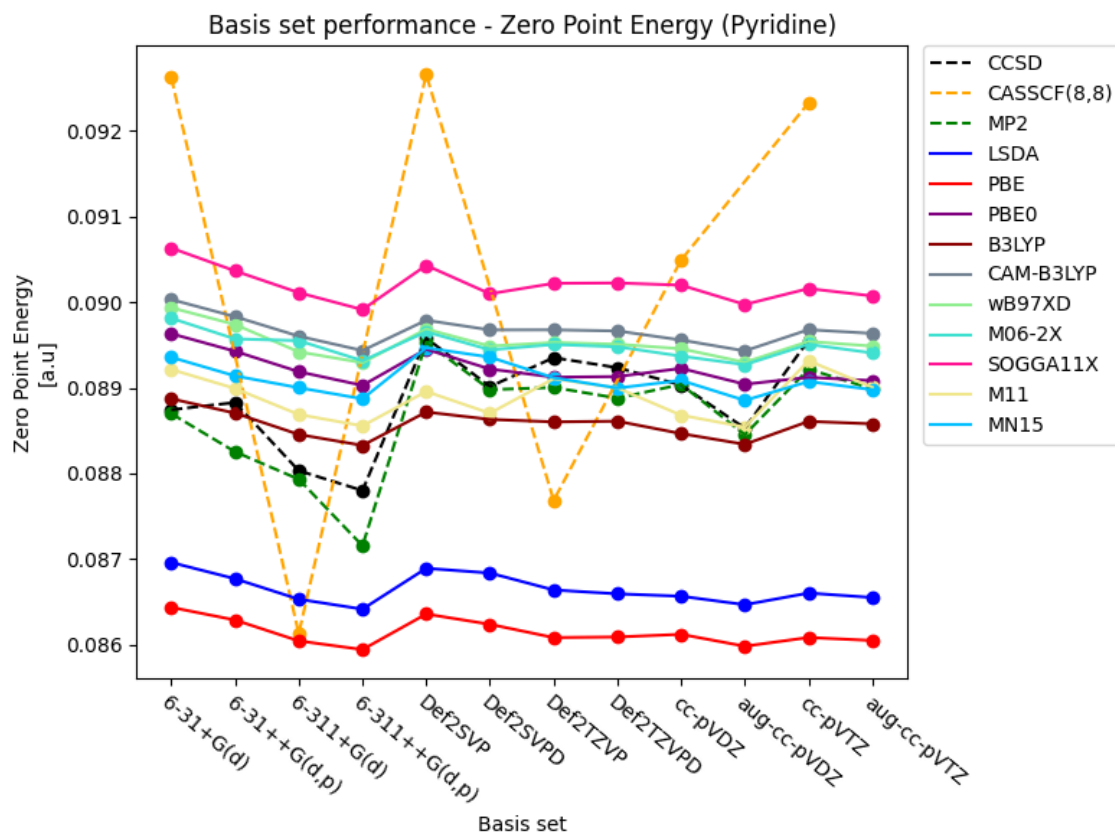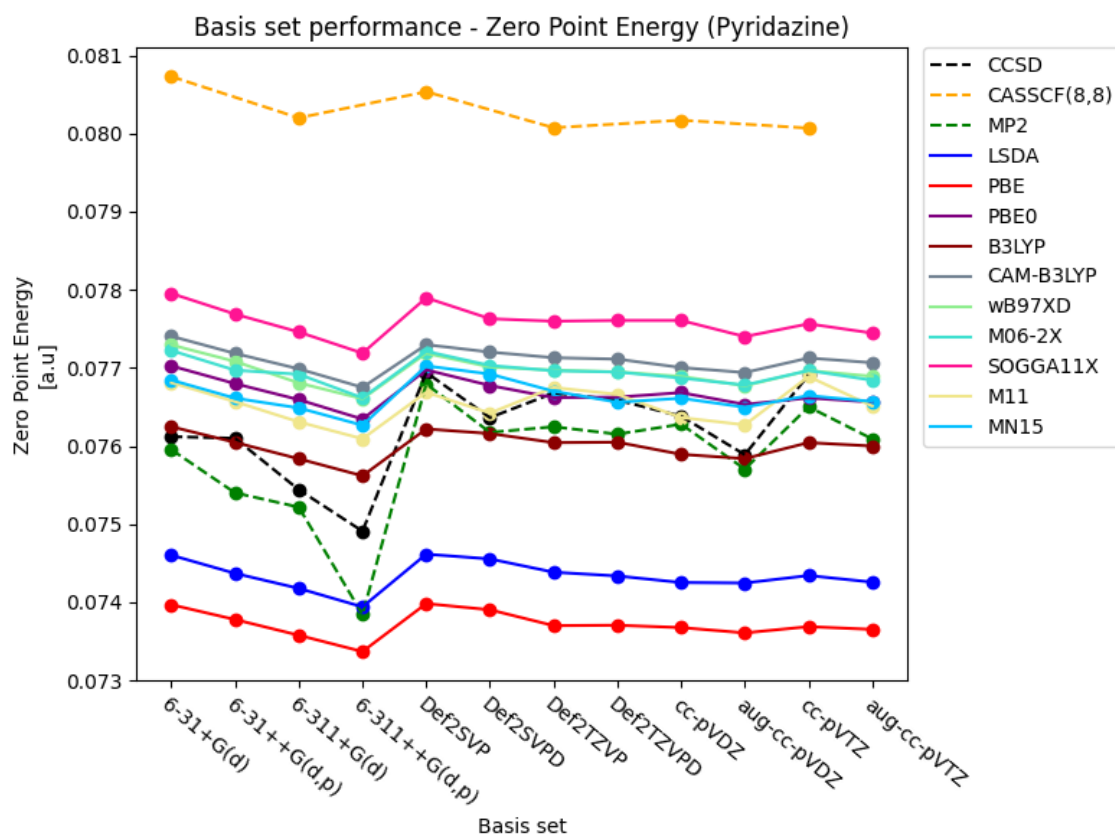

Basis set performance - Zero Point Energy (Pyrimidine)

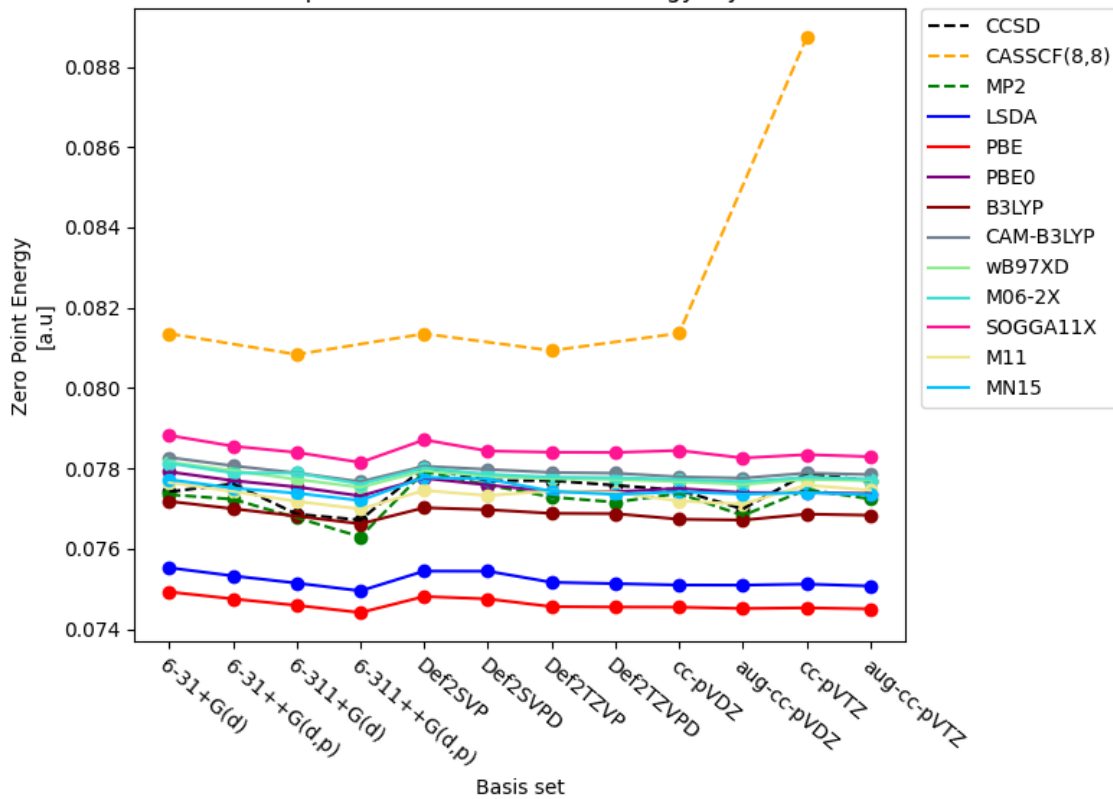

Basis set performance - Zero Point Energy (Pyrazine)

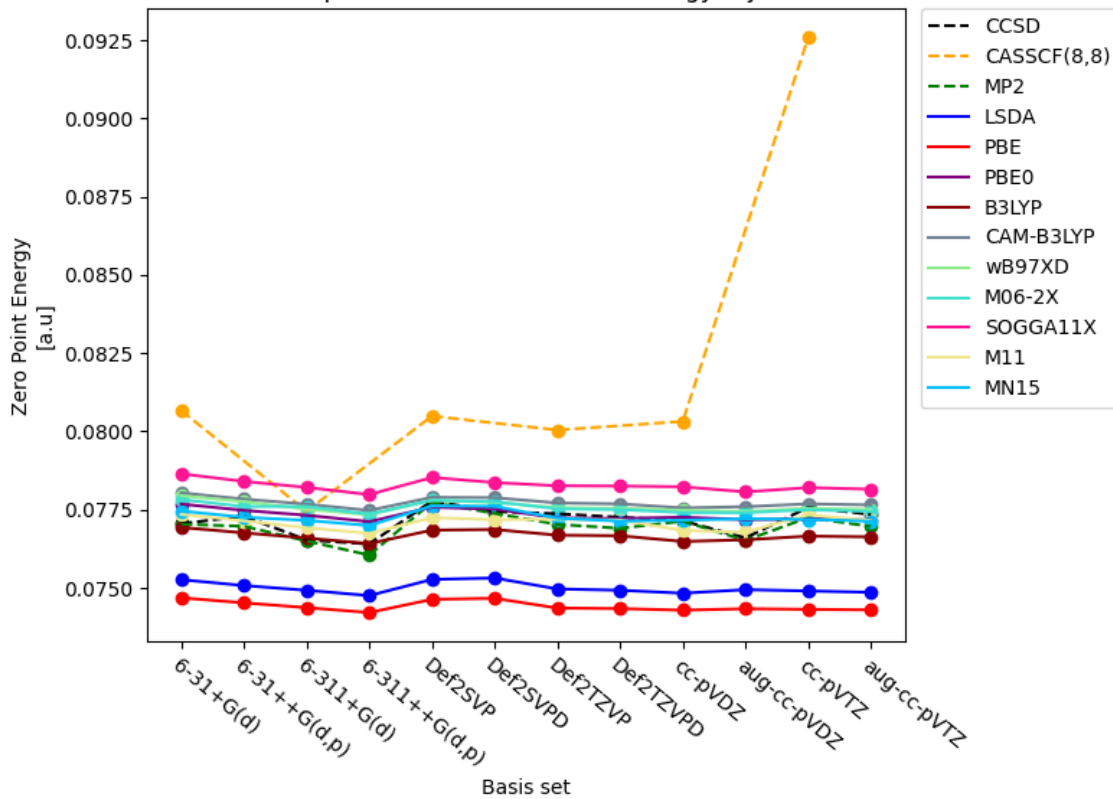

## C.8 Sum of Electronic Energy and ZPE

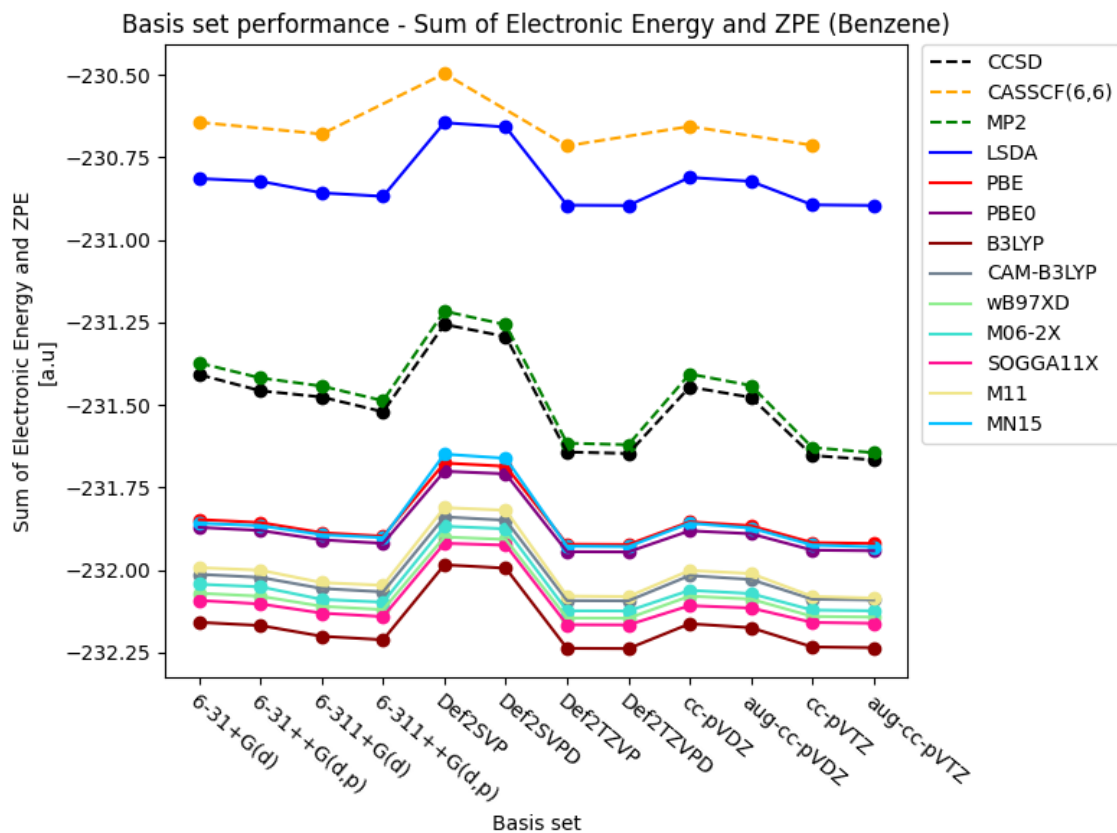

Basis set performance - Sum of Electronic Energy and ZPE (Pyridine)

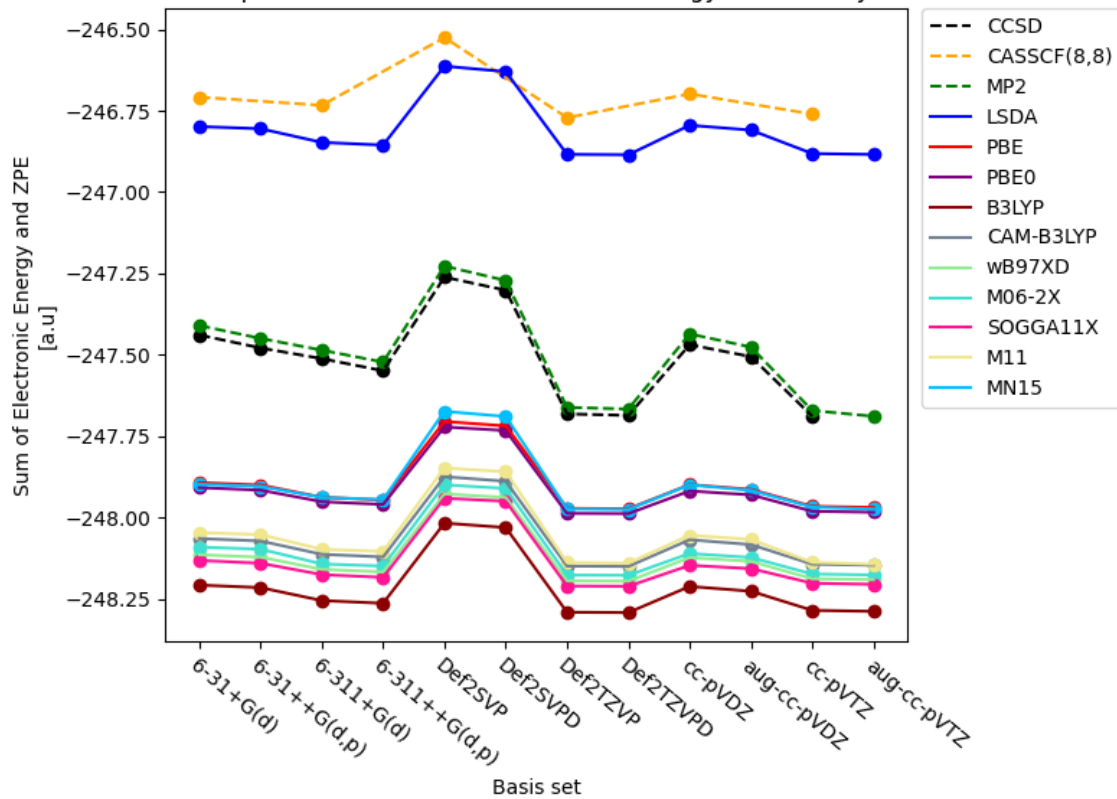

Basis set performance - Sum of Electronic Energy and ZPE (Pyridazine)

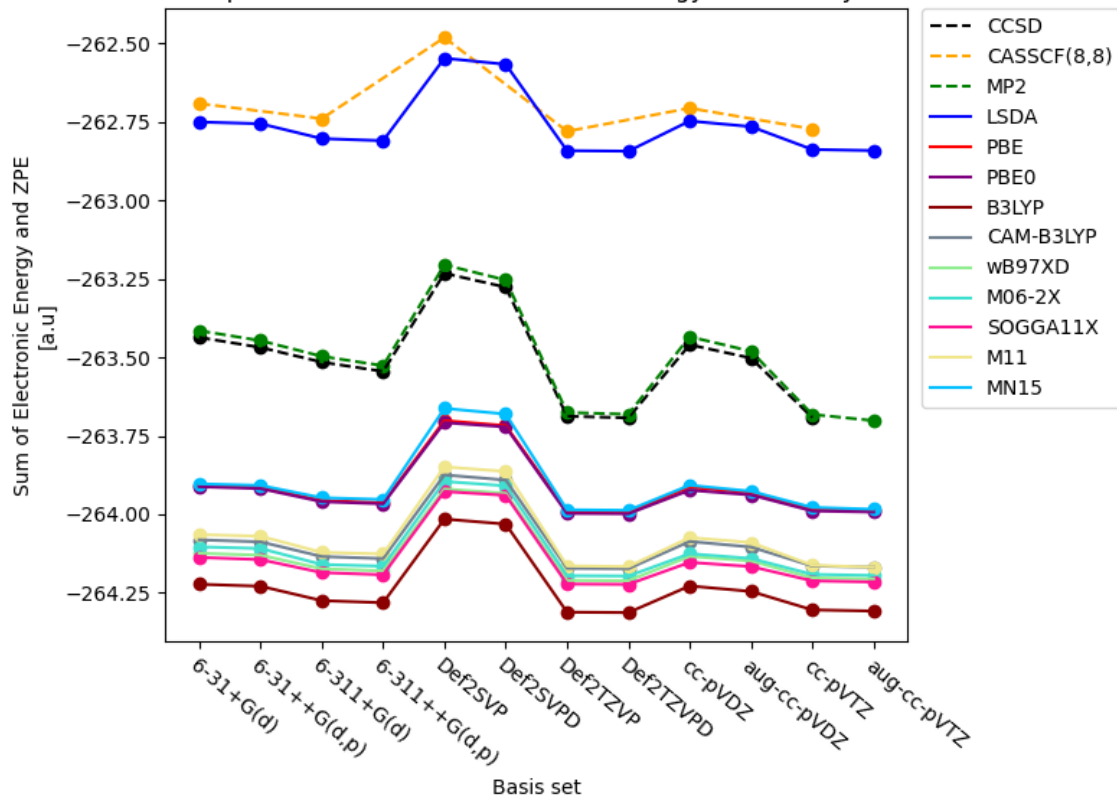

Basis set performance - Sum of Electronic Energy and ZPE (Pyrimidine)

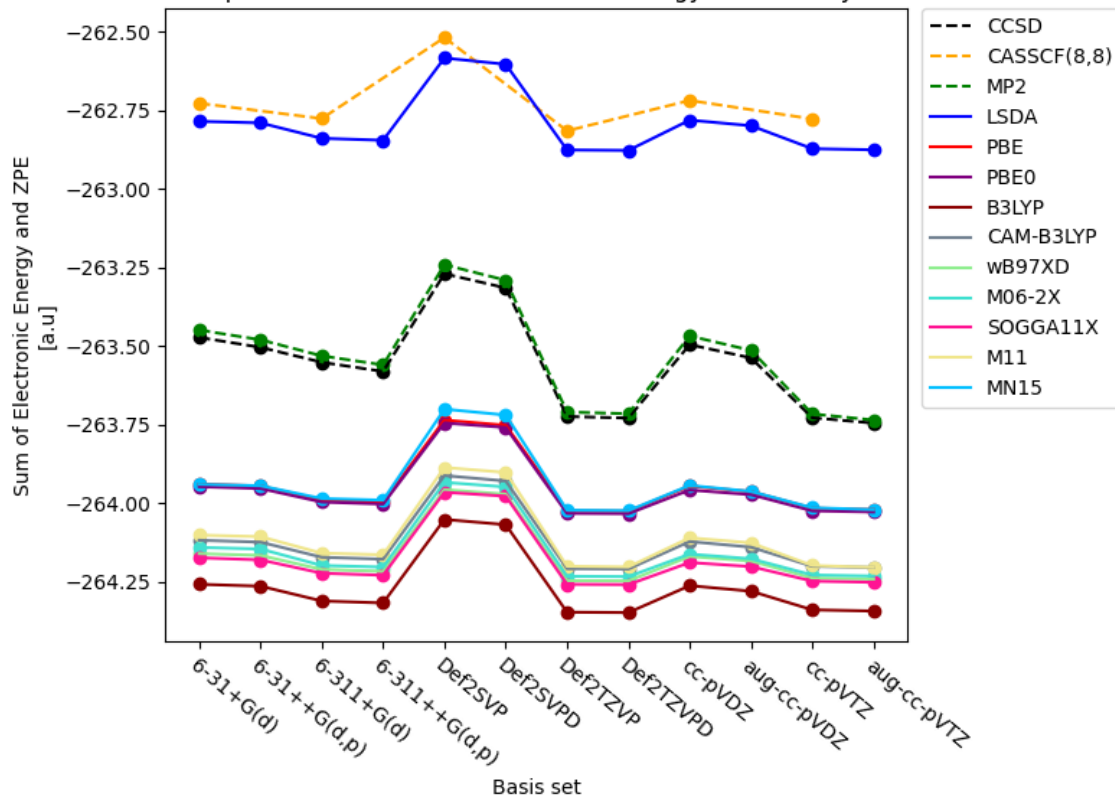

Basis set performance - Sum of Electronic Energy and ZPE (Pyrazine)

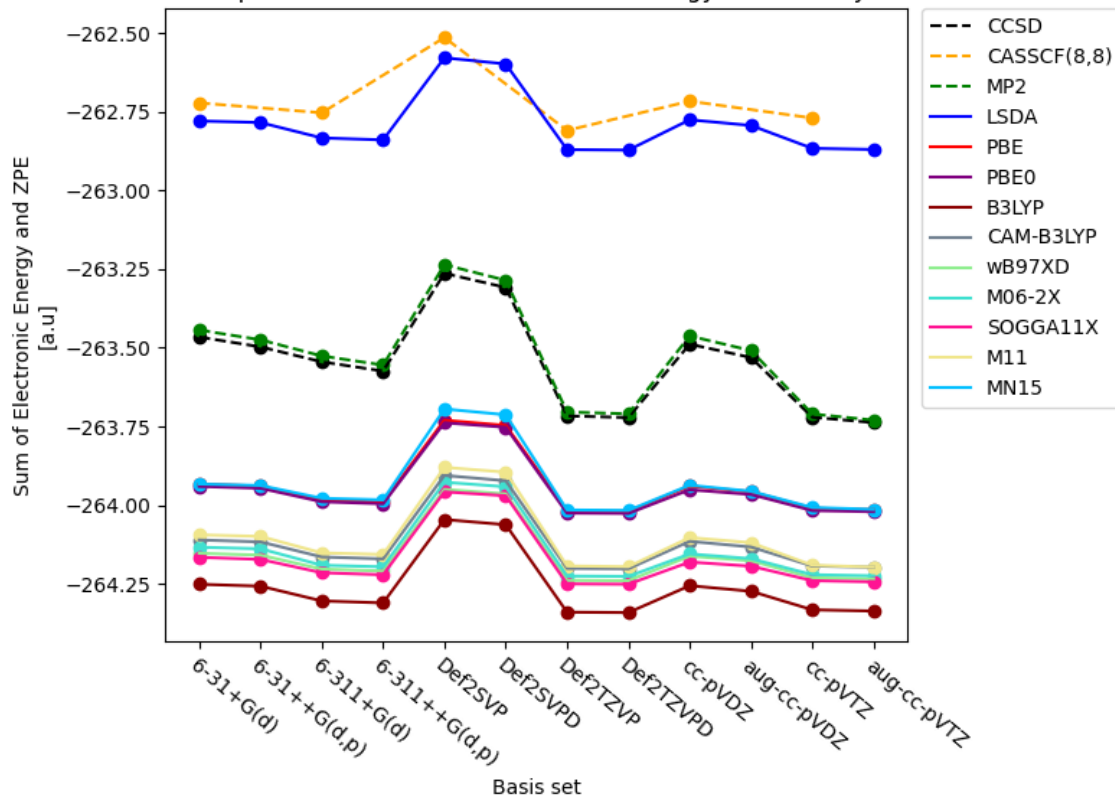



## D Benchmark Plots

All figures with relative errors from the 'Benchmarking of DFT Functionals' section are listed in the following. They are arranged similar as the basis set performance plots from the previous section; the relative errors for all five molecules are listed together for each property. The relative differences are calculated with respect to the corresponding property obtained at CCSD level of theory. The electronic structure methods are listed along the horizontal axis, and the basis sets are listed along the vertical axis. The associated molecule is specified in parentheses on top of each figure. The colorbar indicates the size of the relative error; the color red indicates an overestimation of the property, whereas blue indicates an underestimation.

### D.1 HOMA Index

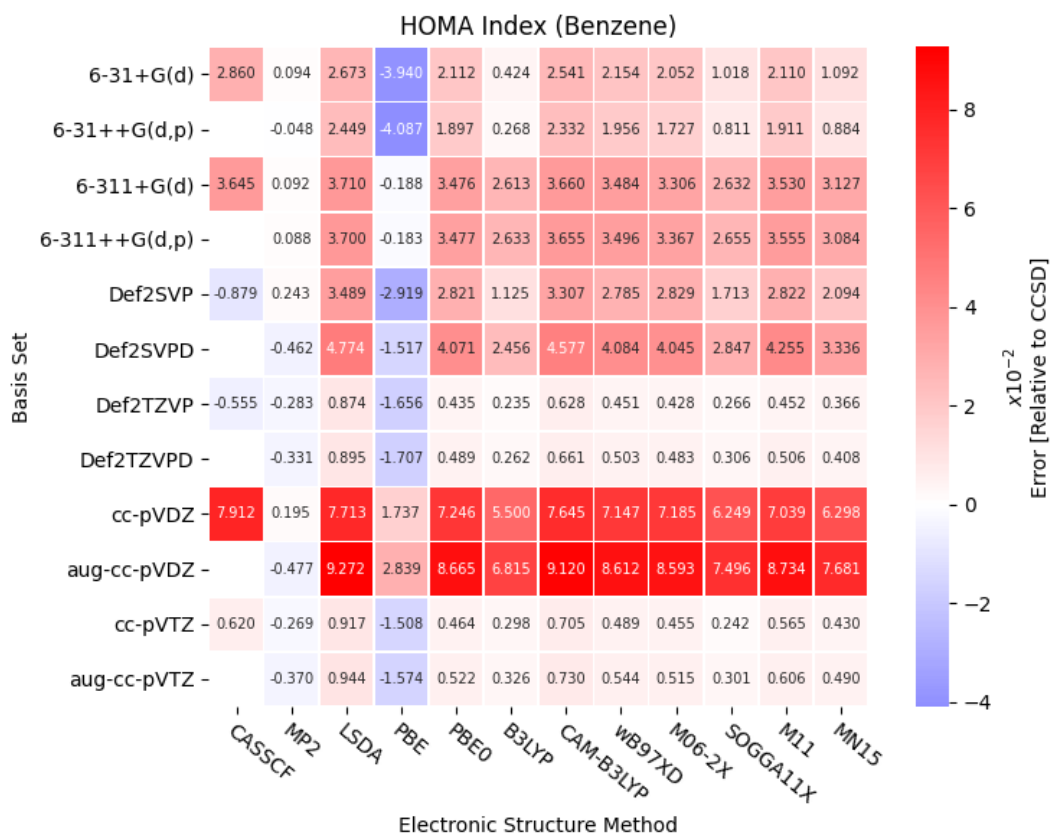

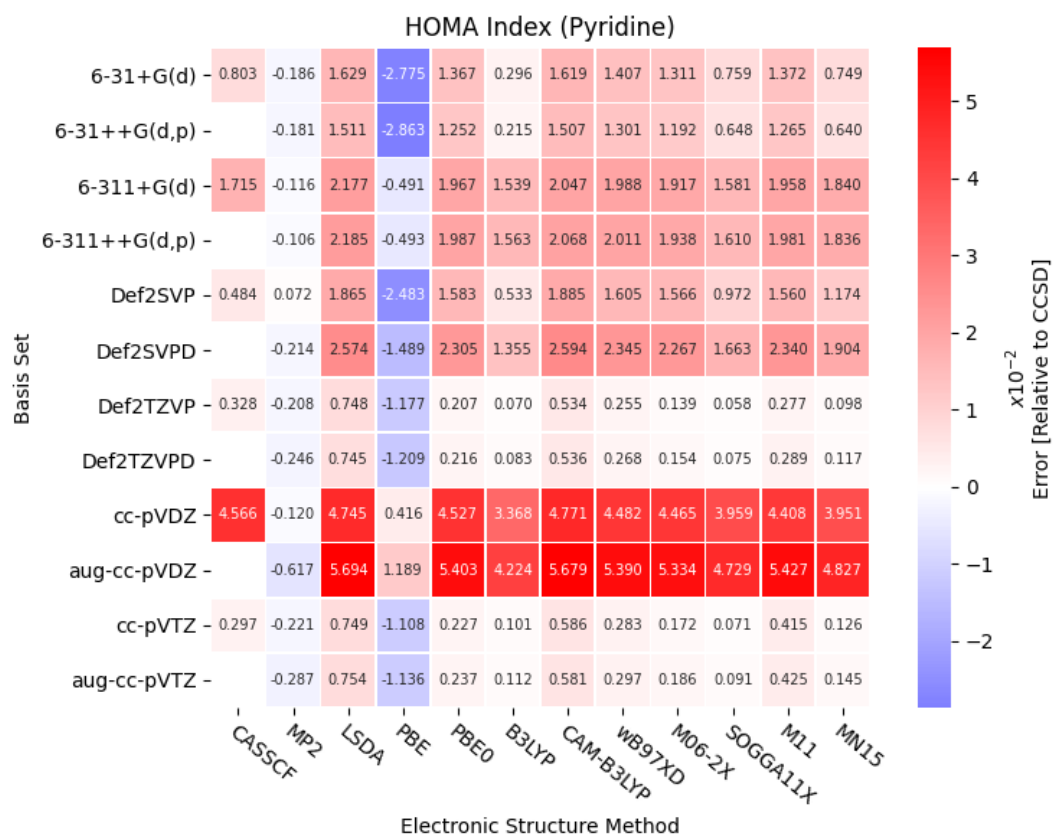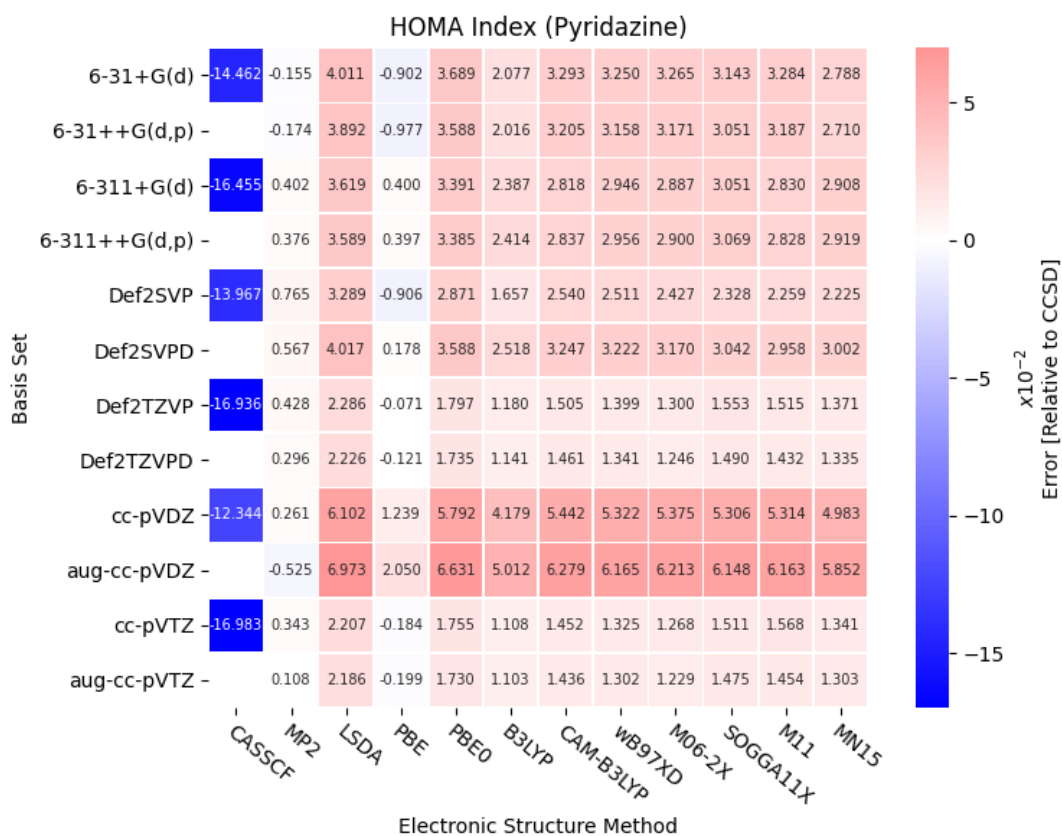

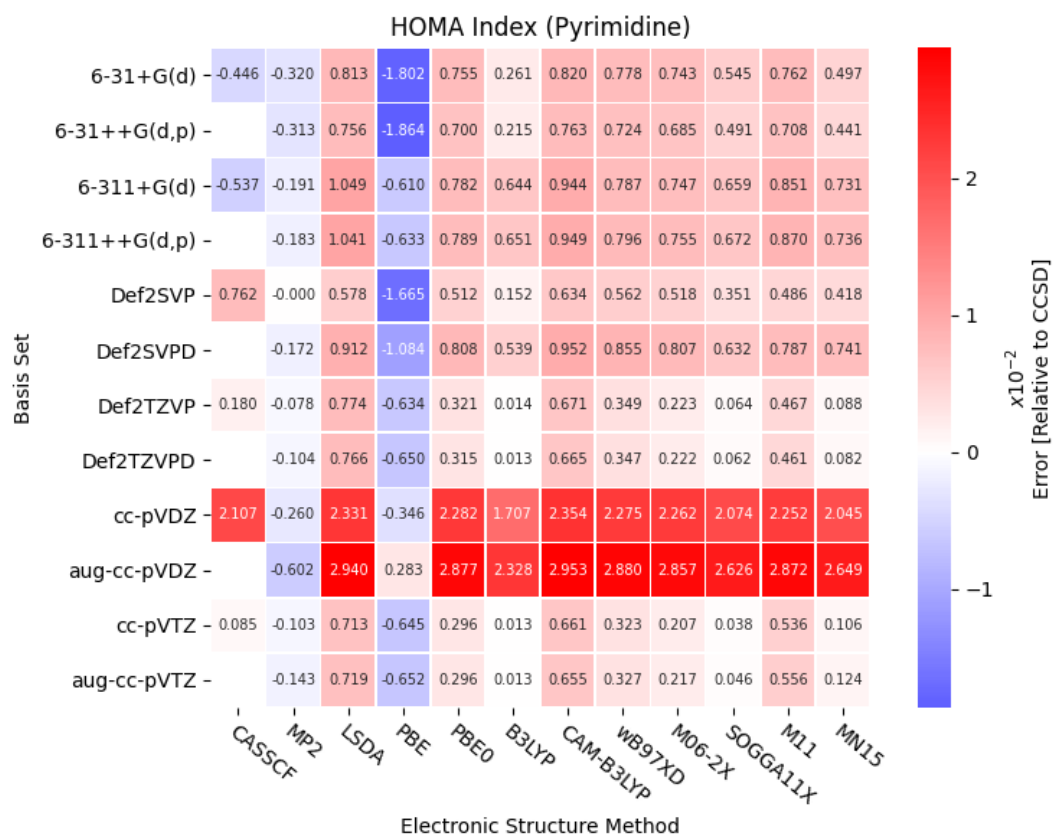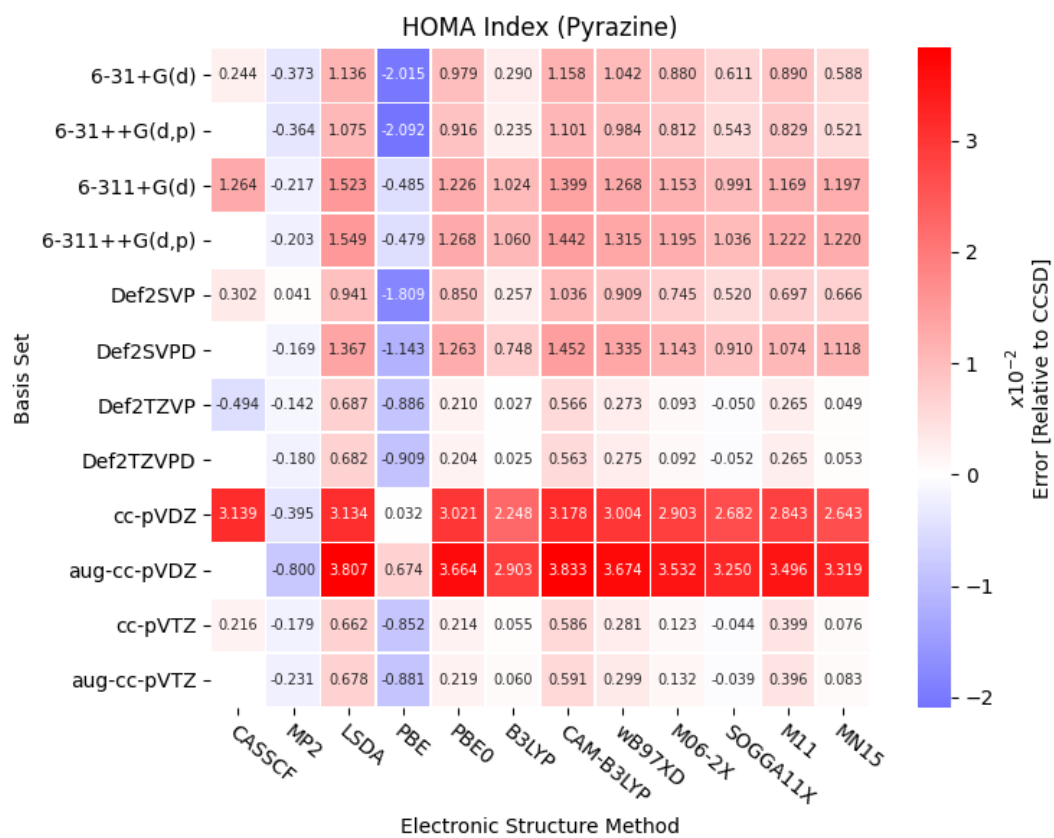

## D.2 PDI

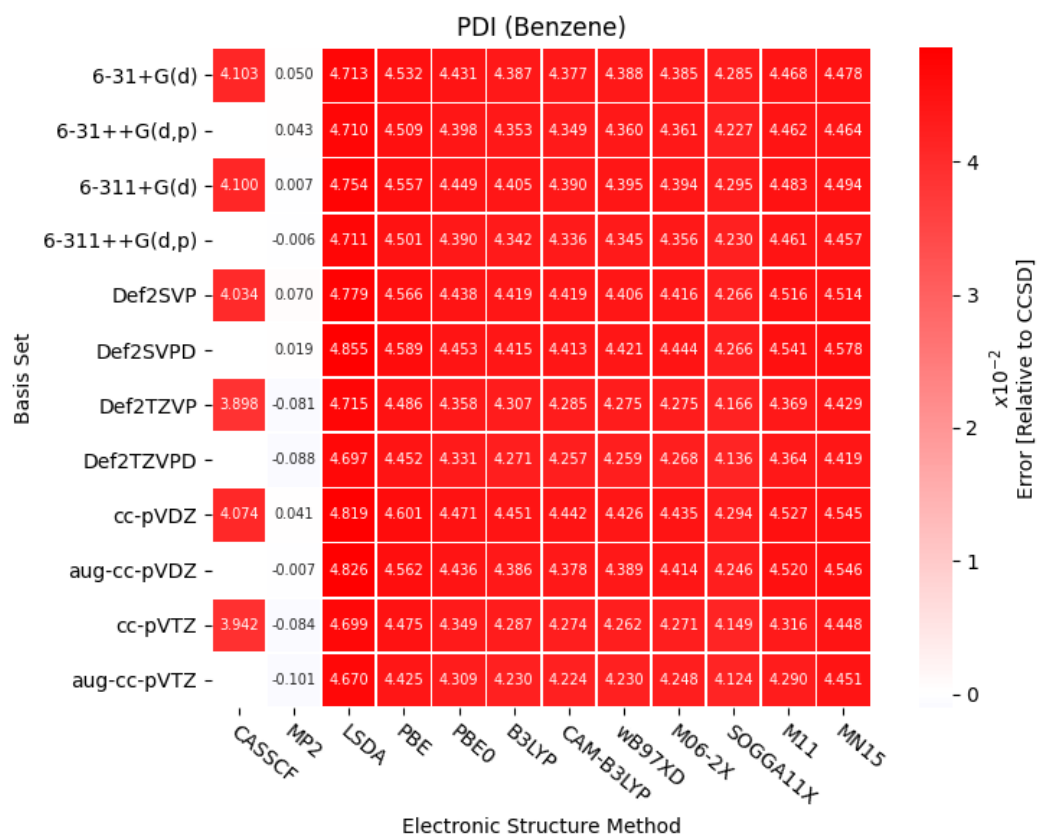

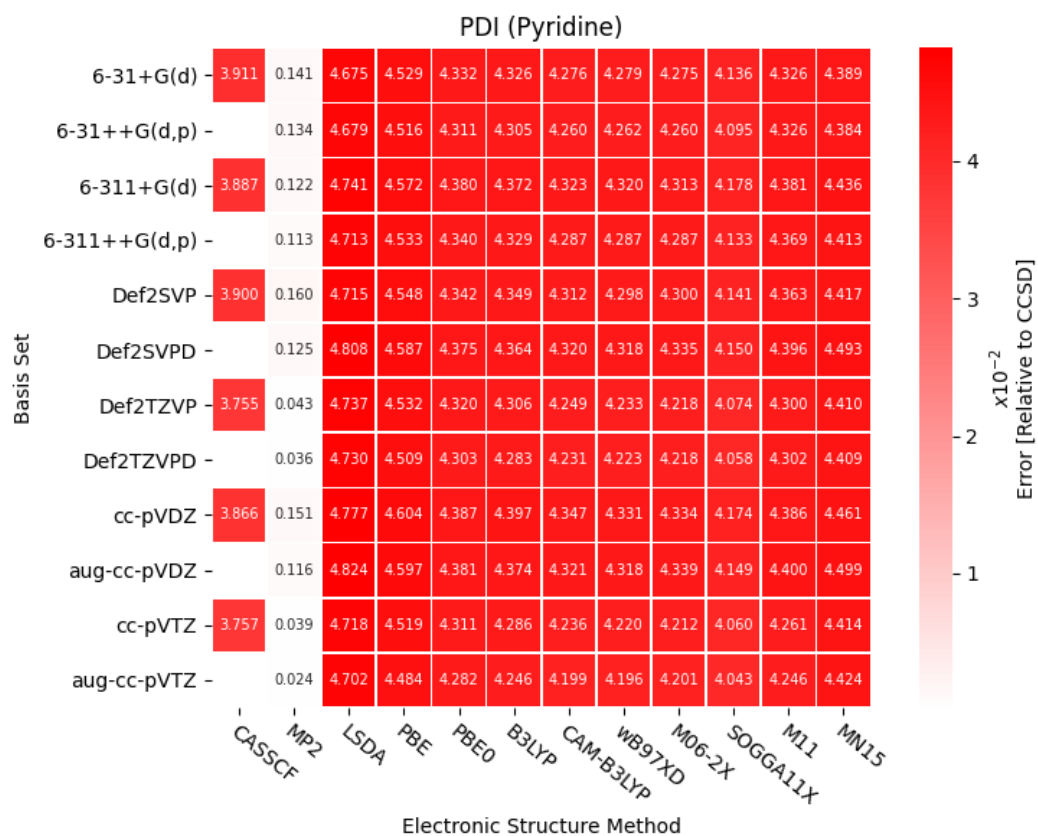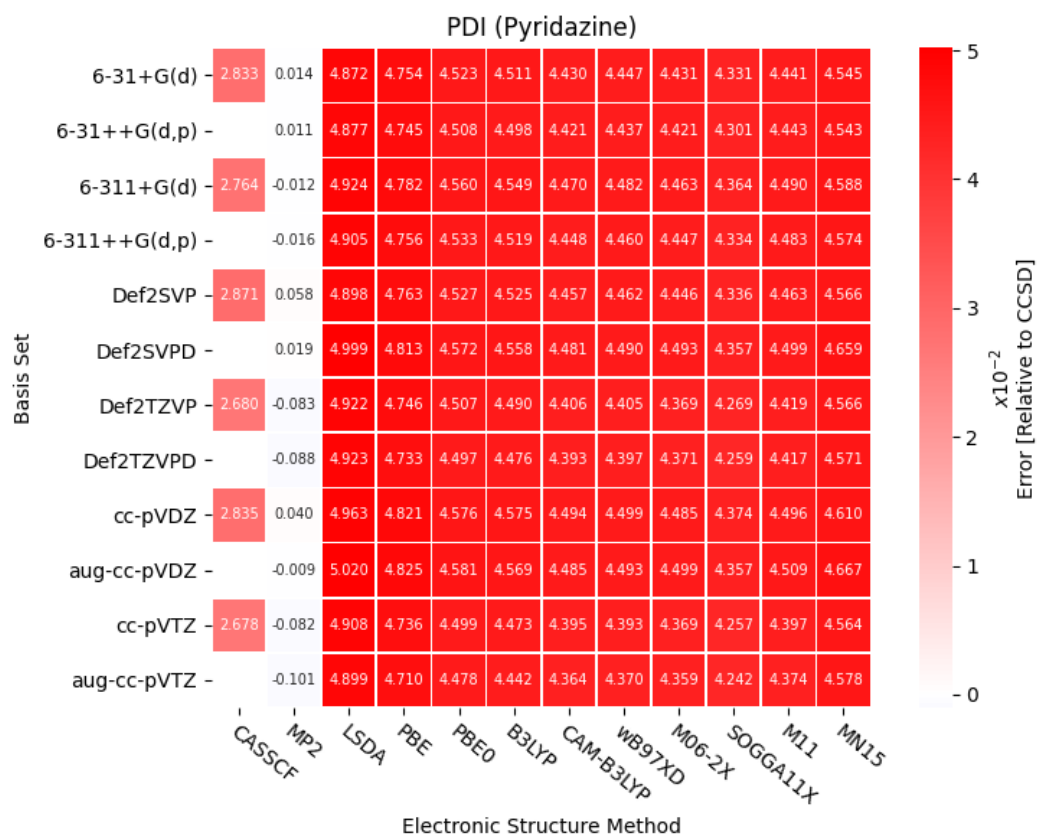

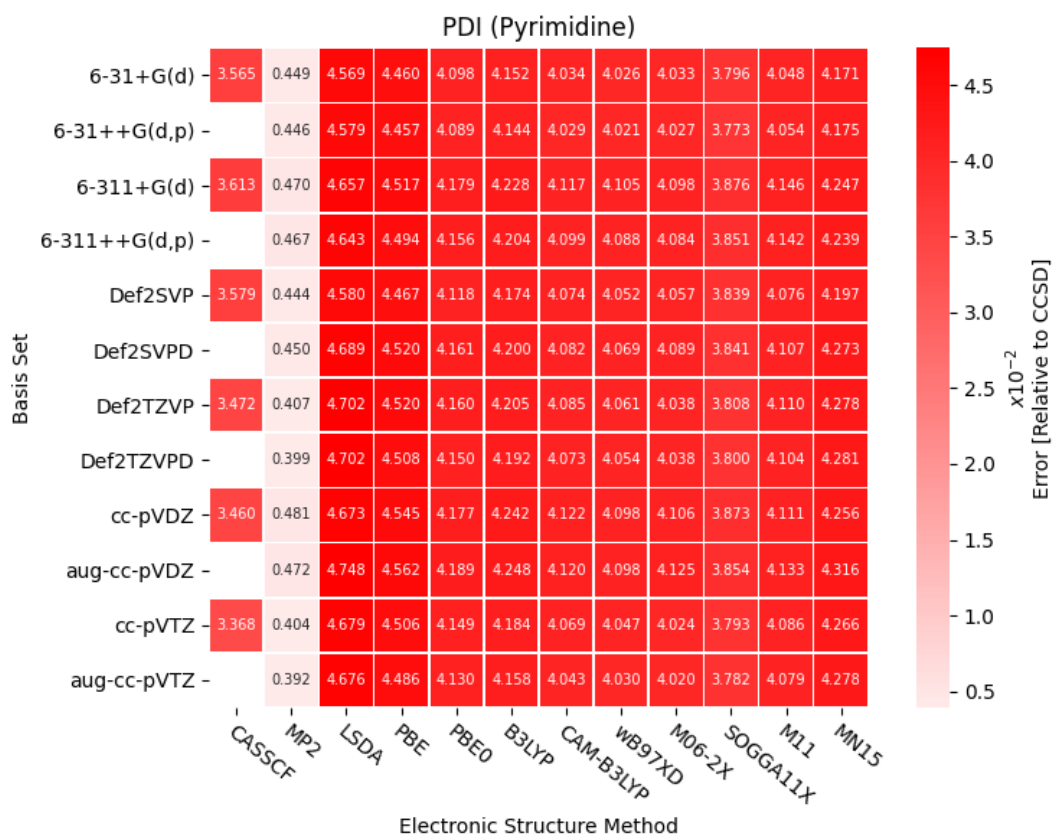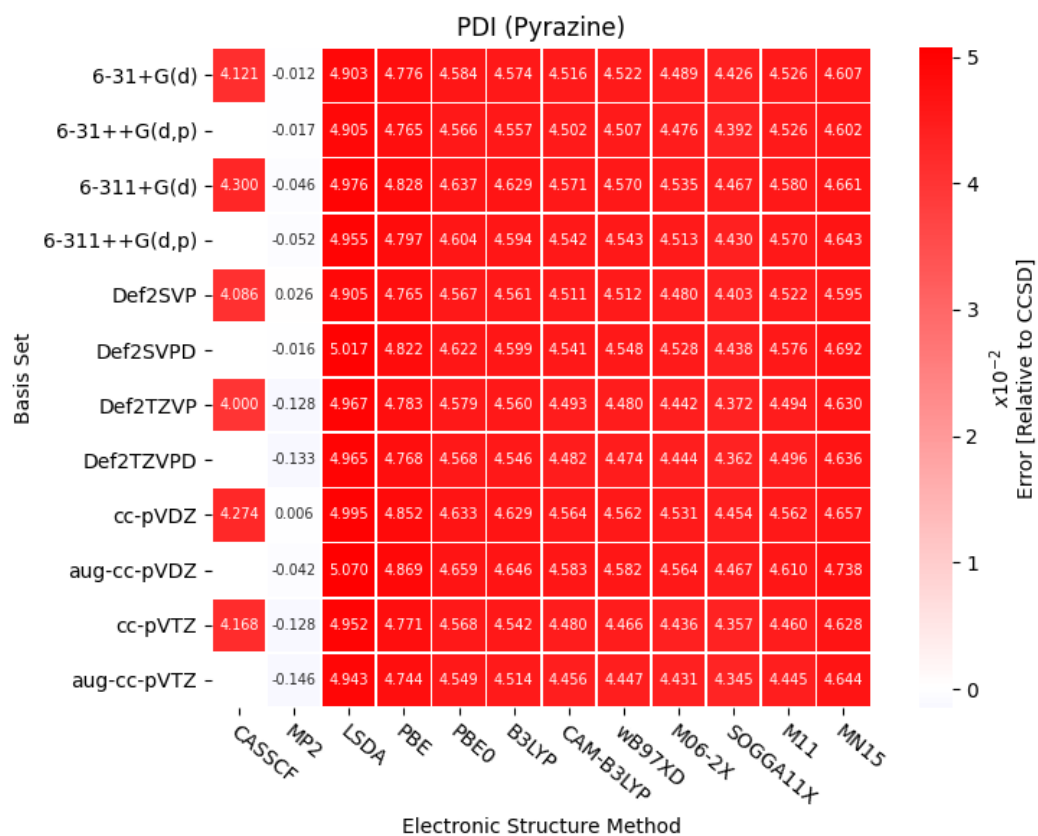

## D.3 MCI

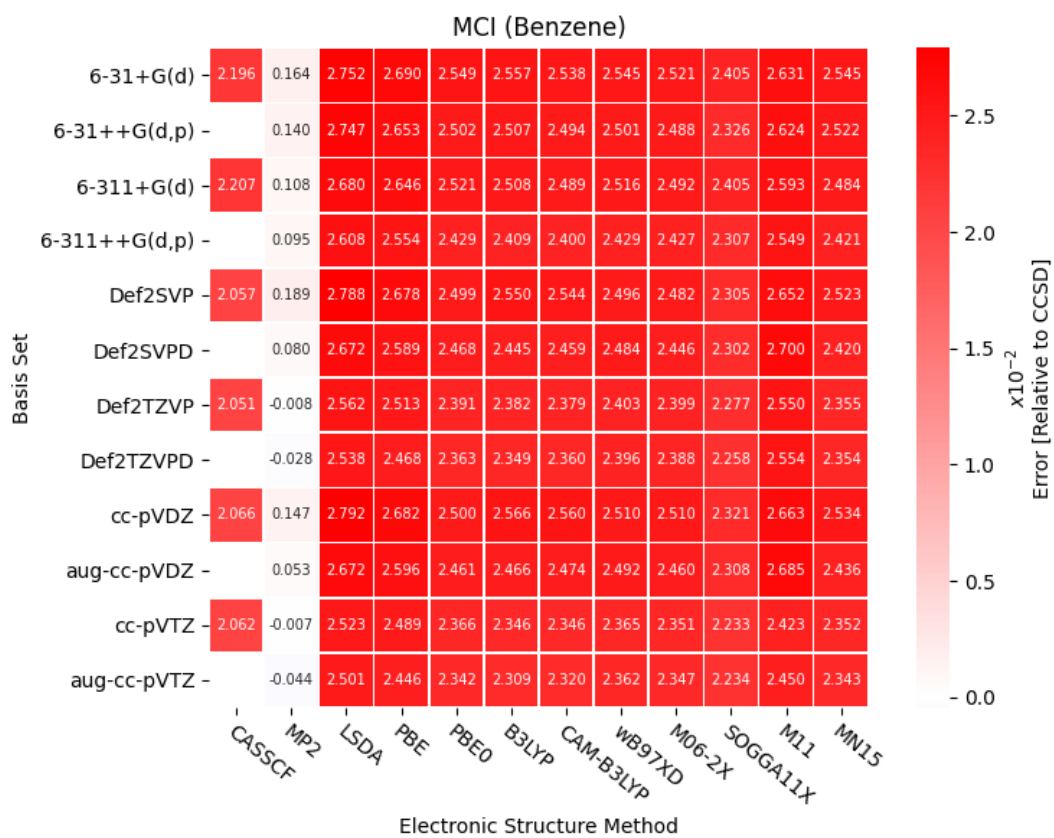

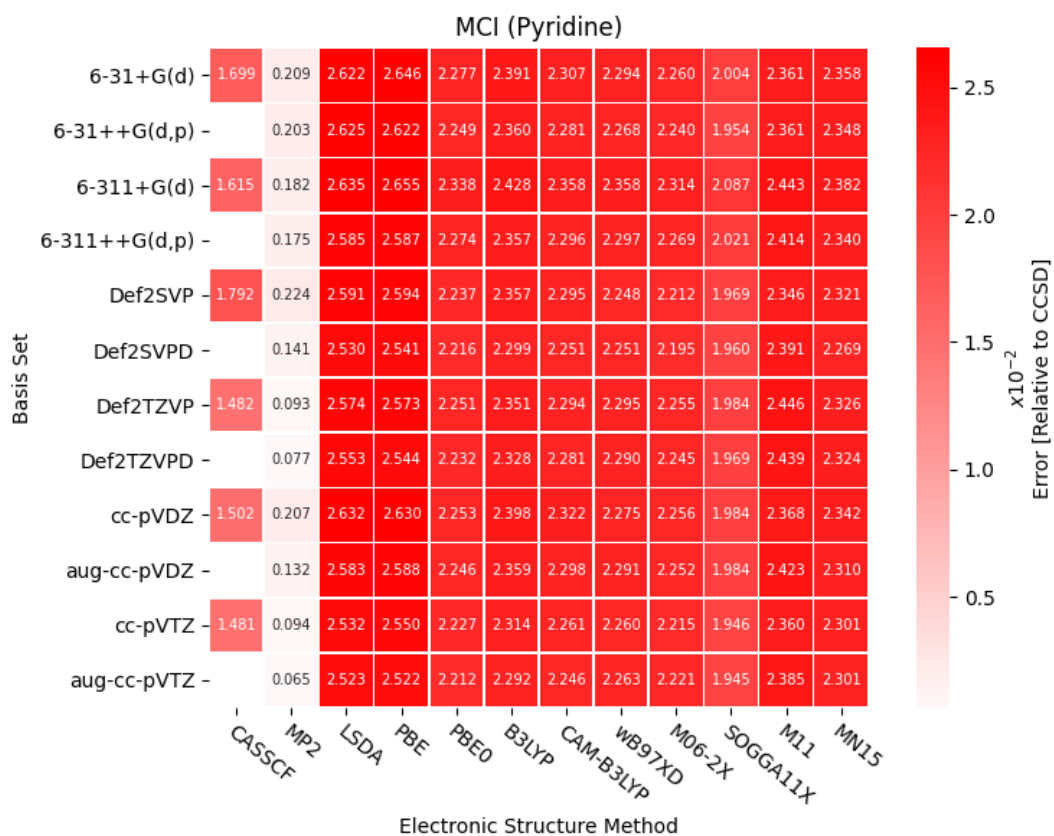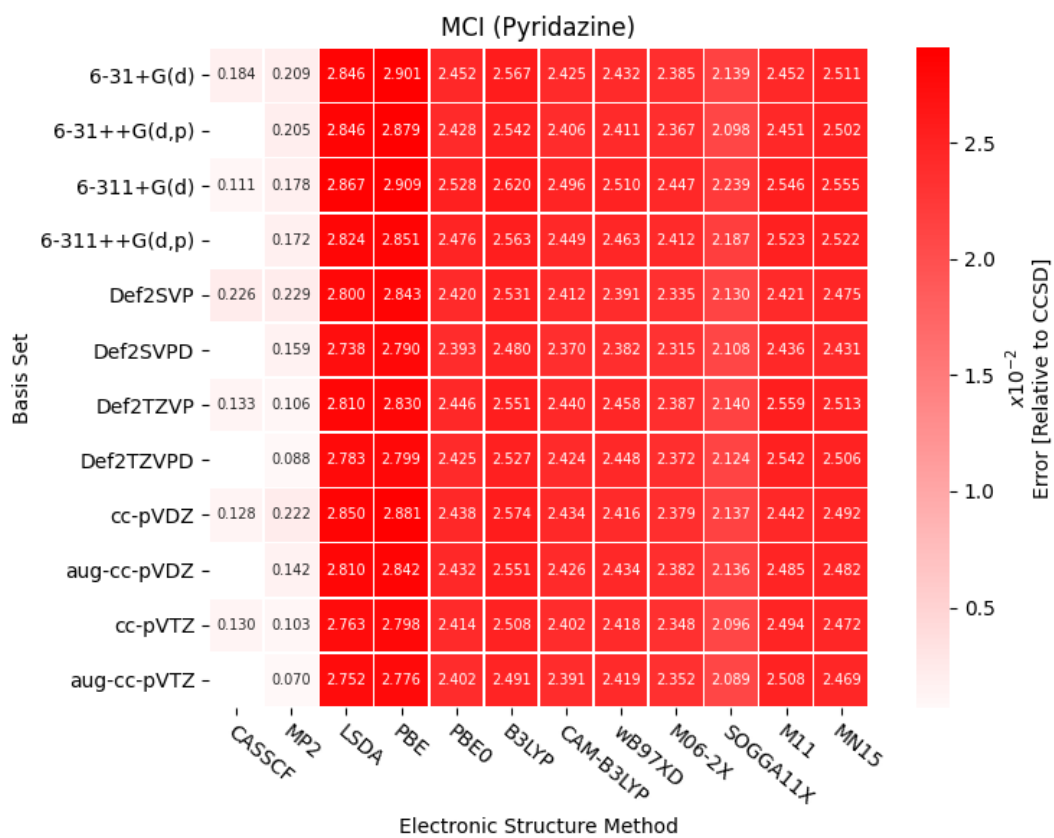



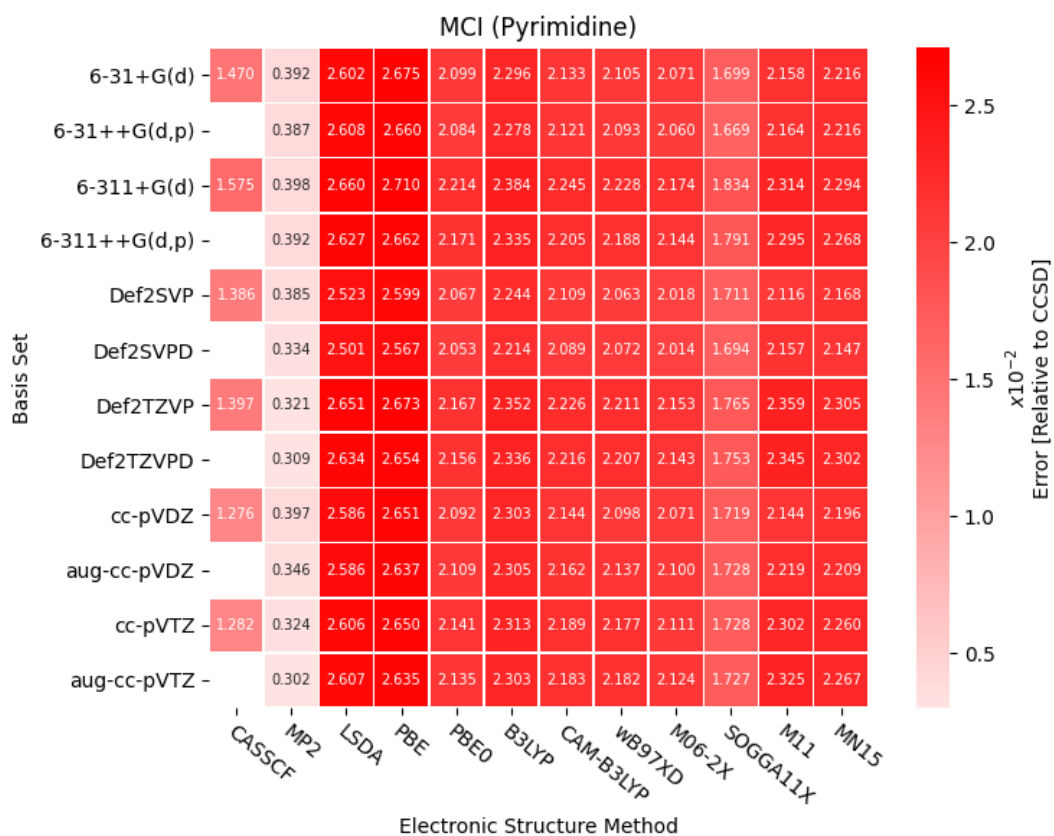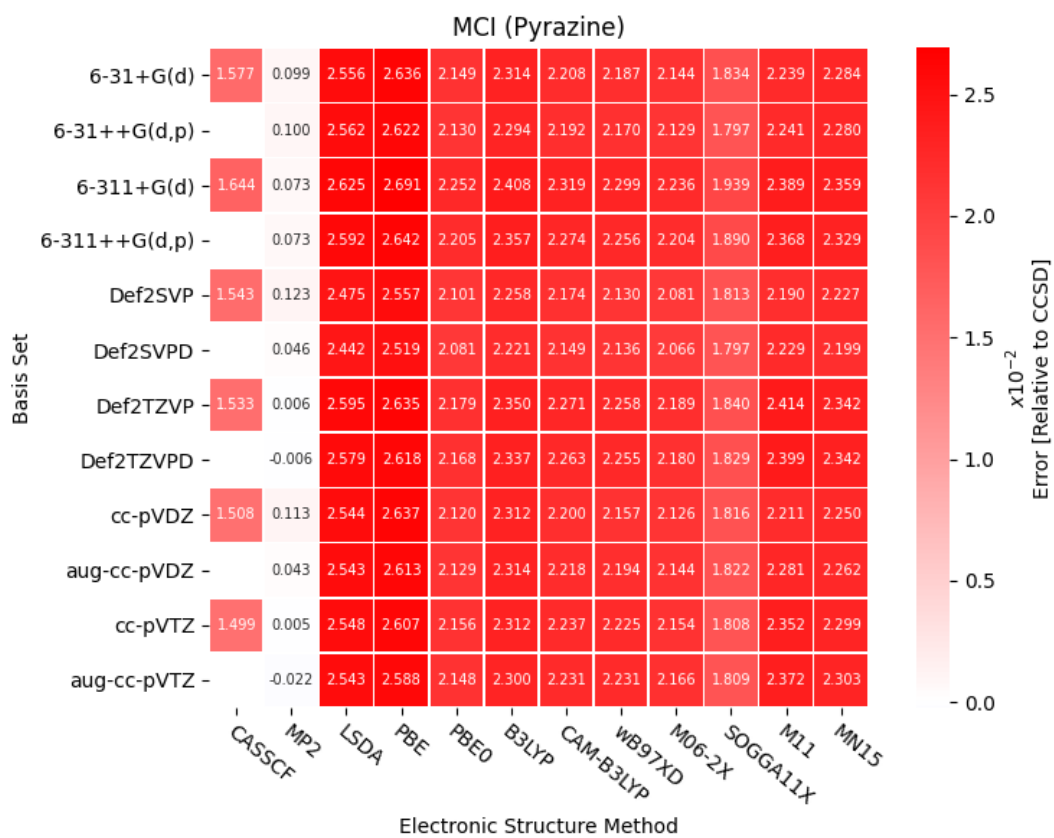

## D.4 AV1245 Index

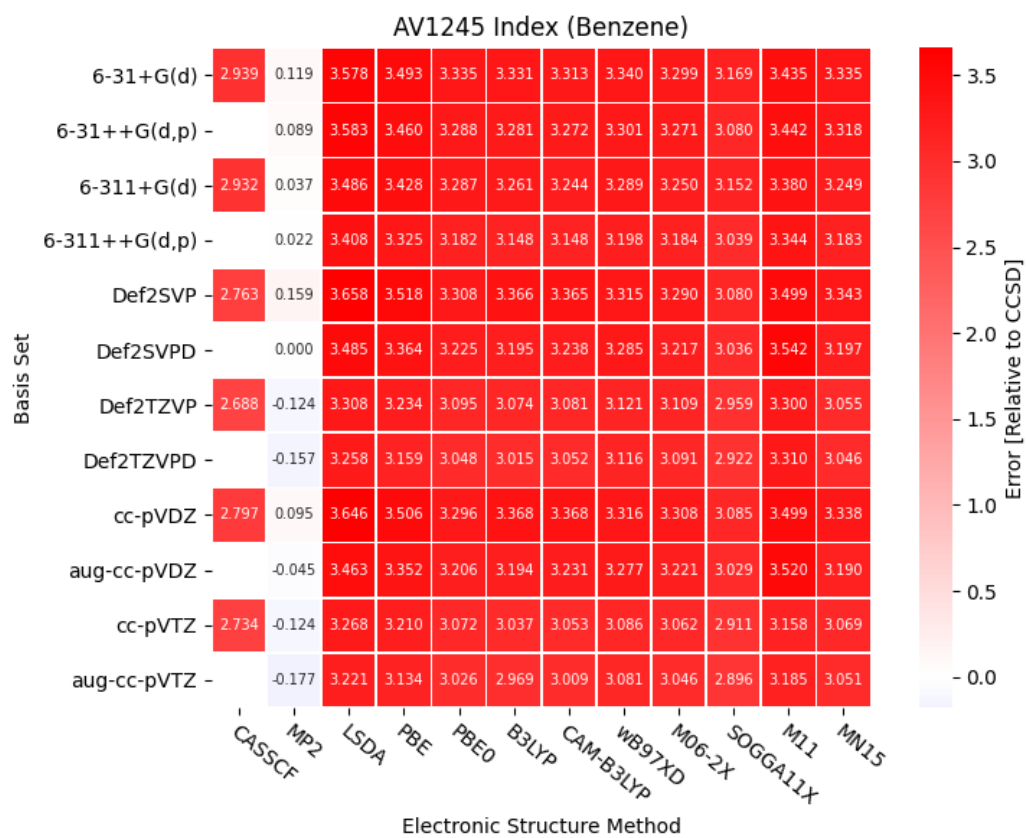

AV1245 Index (Pyridine)

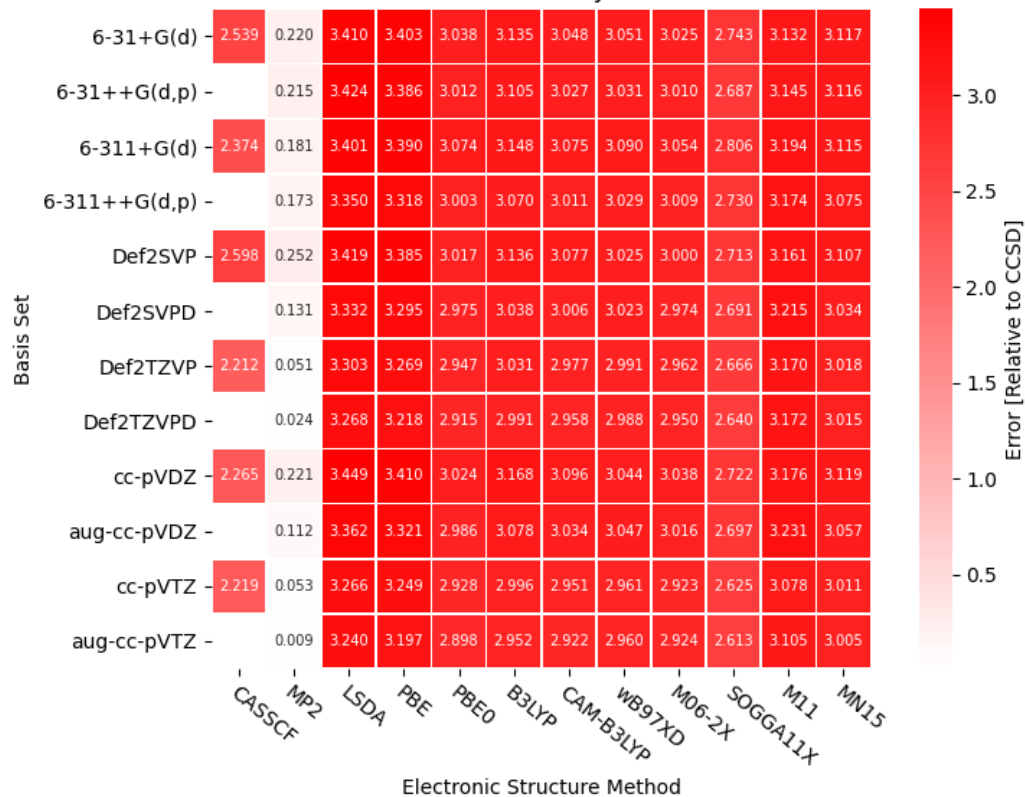

AV1245 Index (Pyridazine)

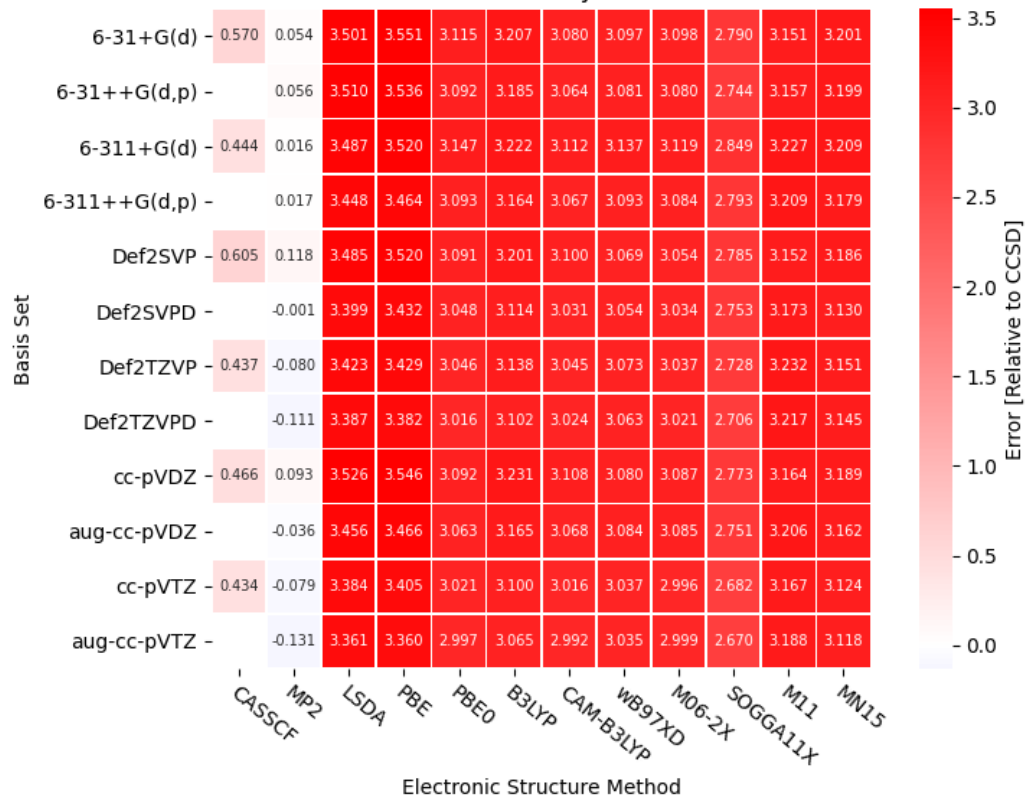

AV1245 Index (Pyrimidine)

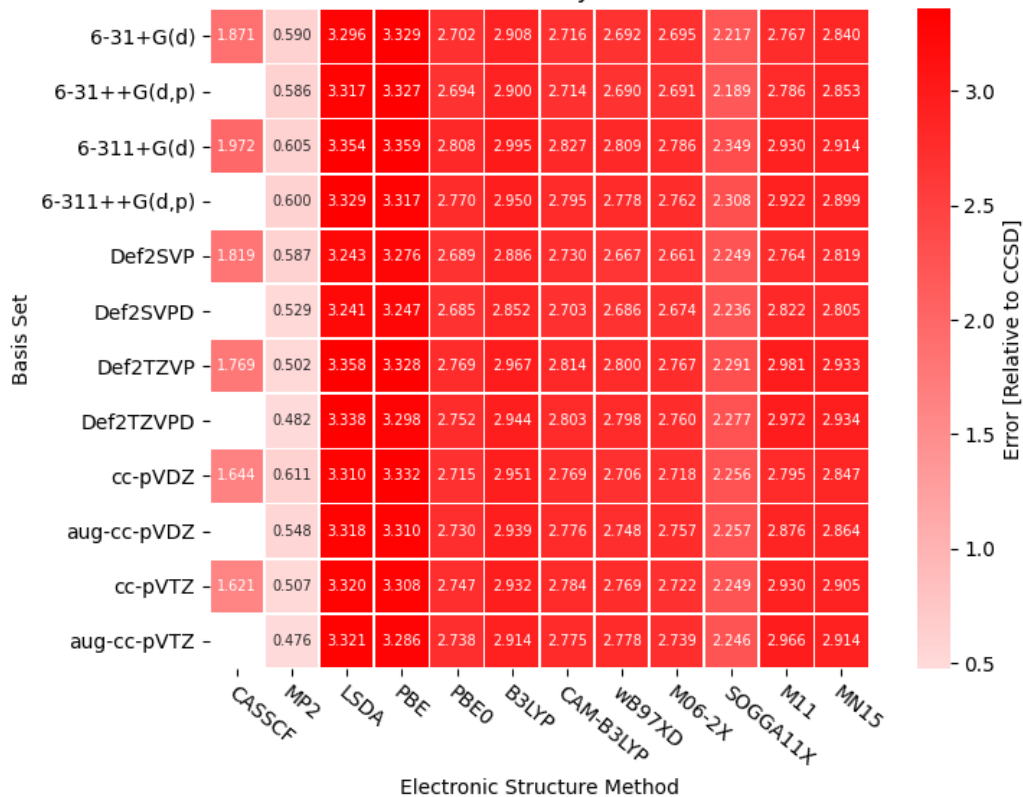

AV1245 Index (Pyrazine)

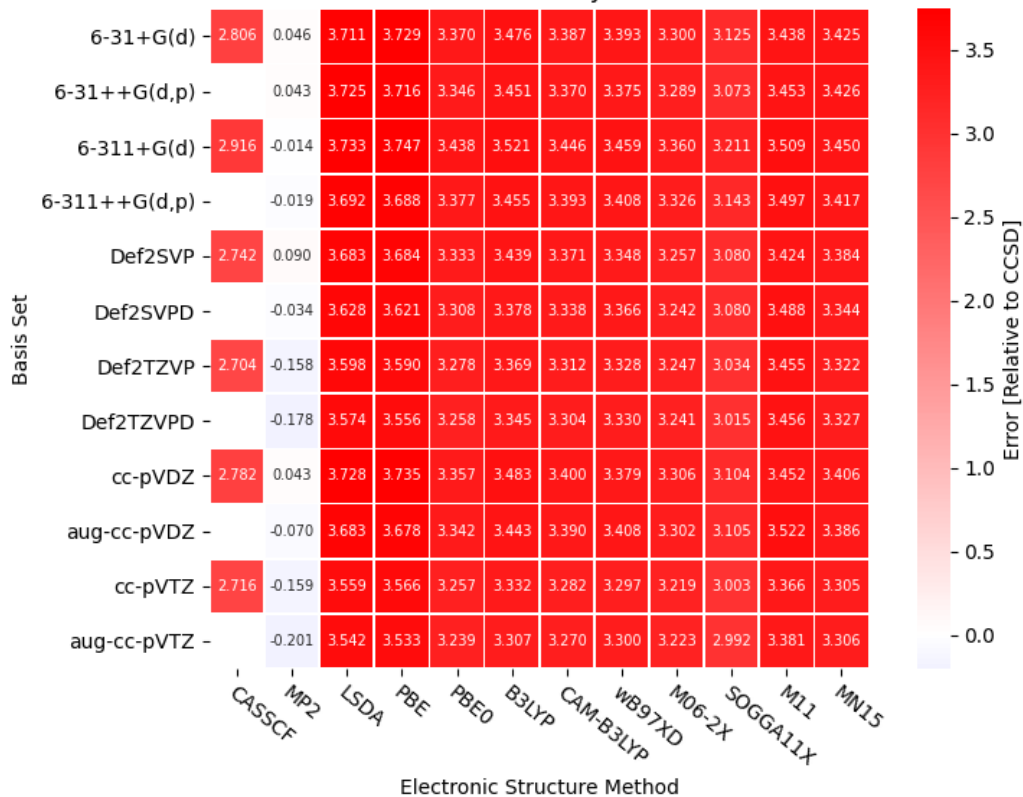

## D.5 FLU Index

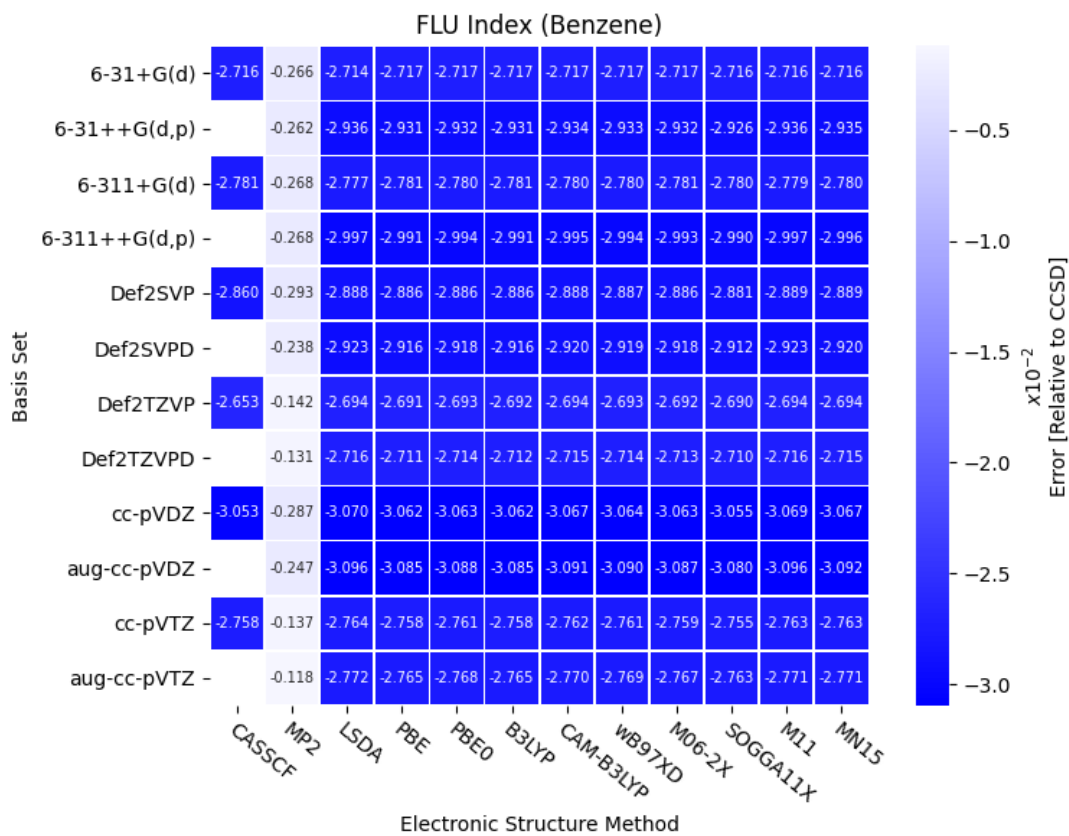

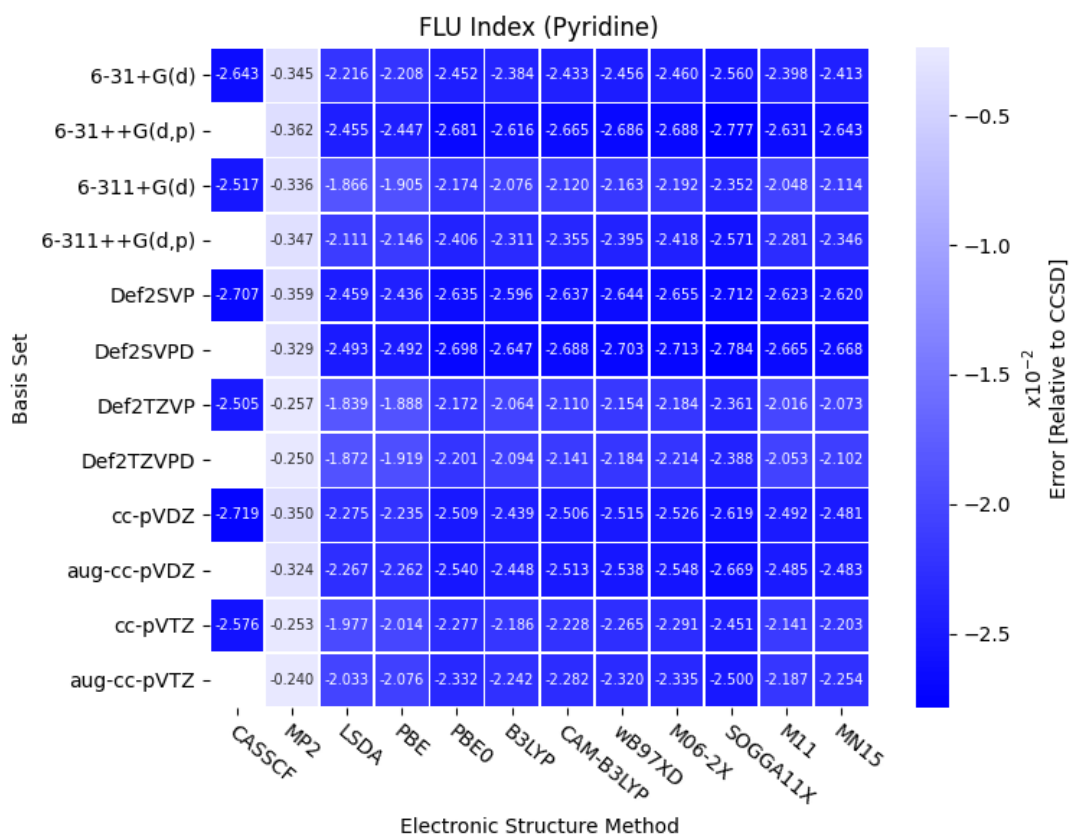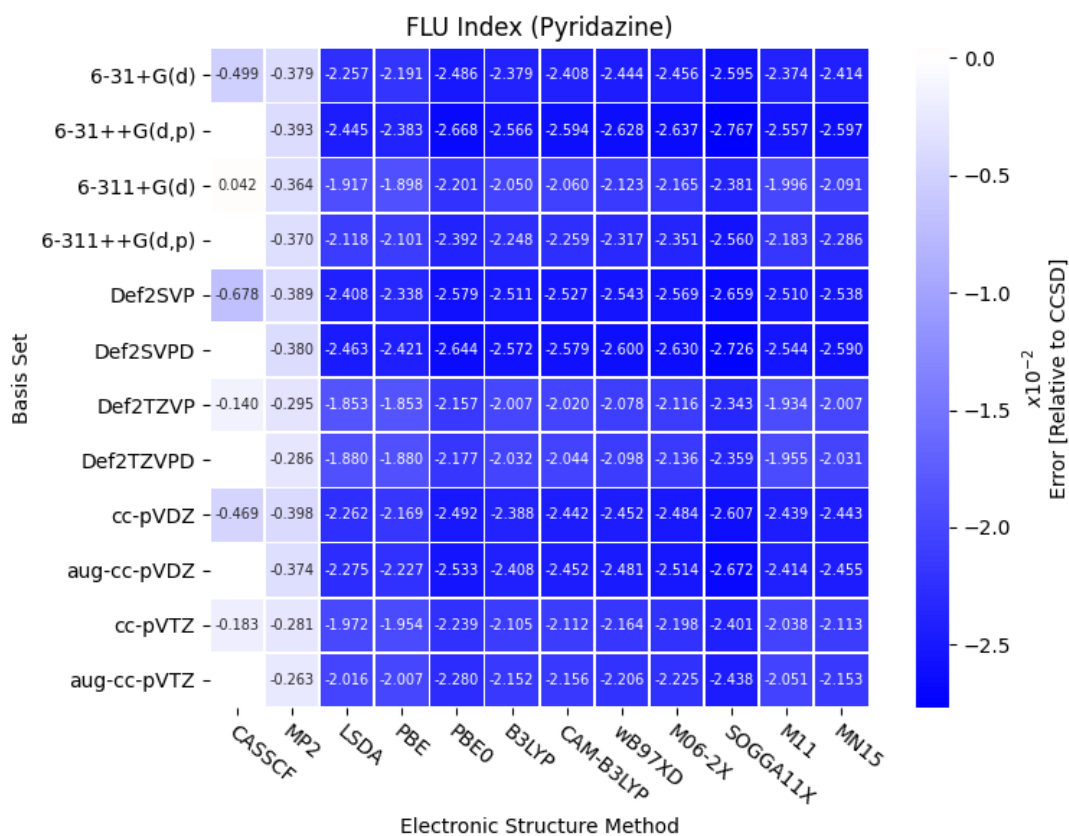

FLU Index (Pyrimidine)

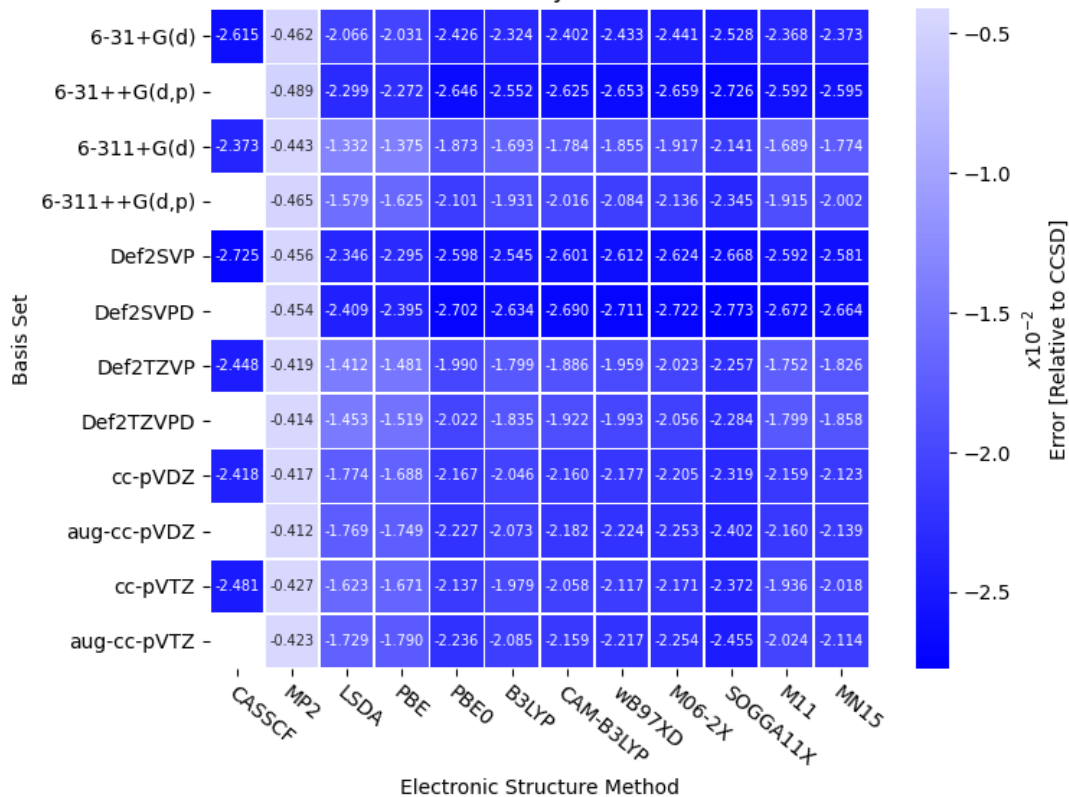

FLU Index (Pyrazine)

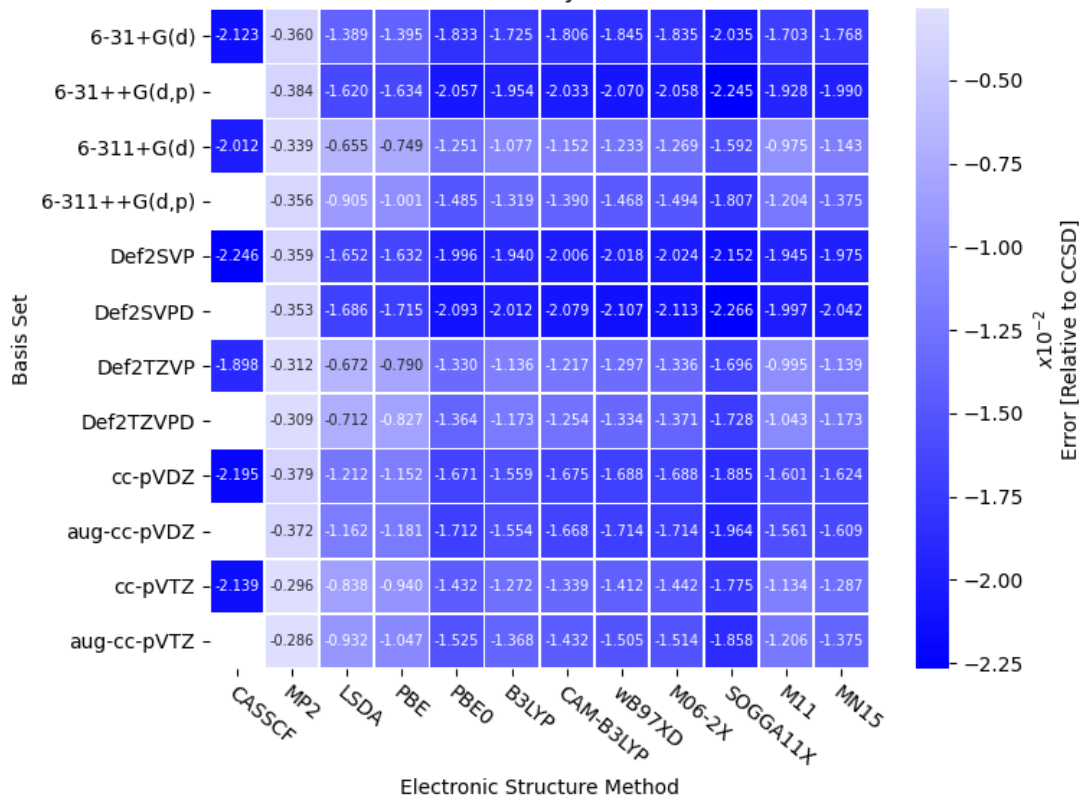

## D.6 Electronic Energy

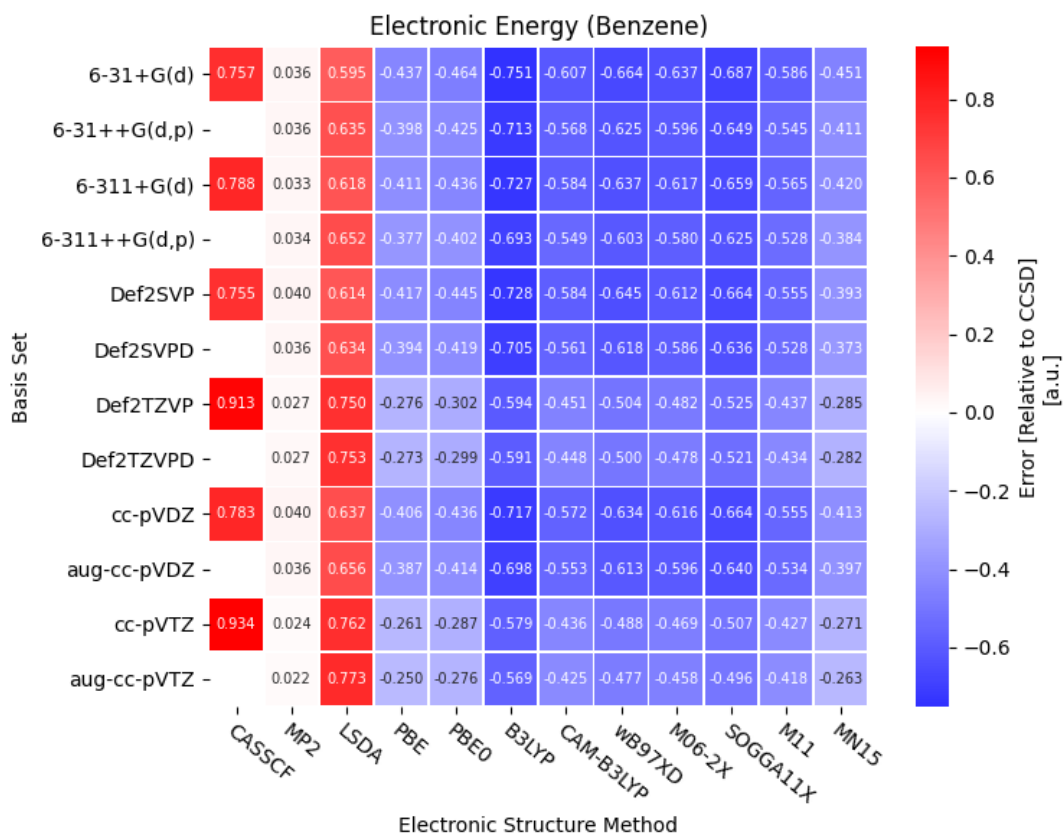



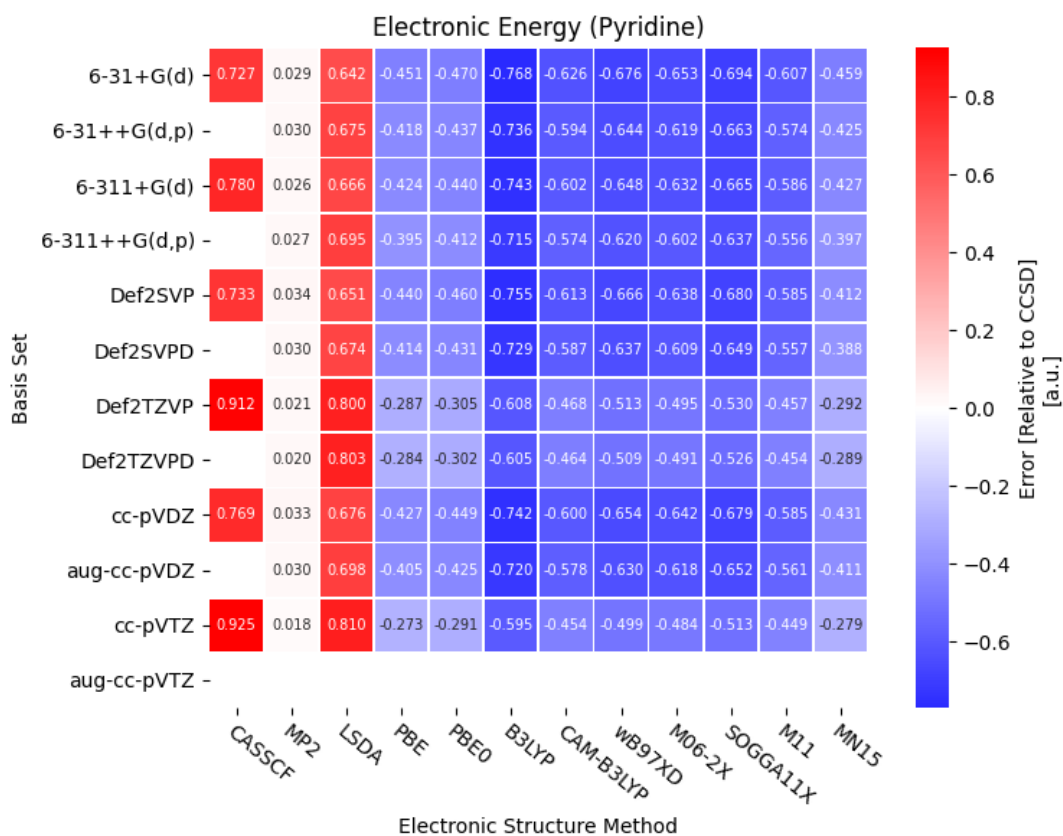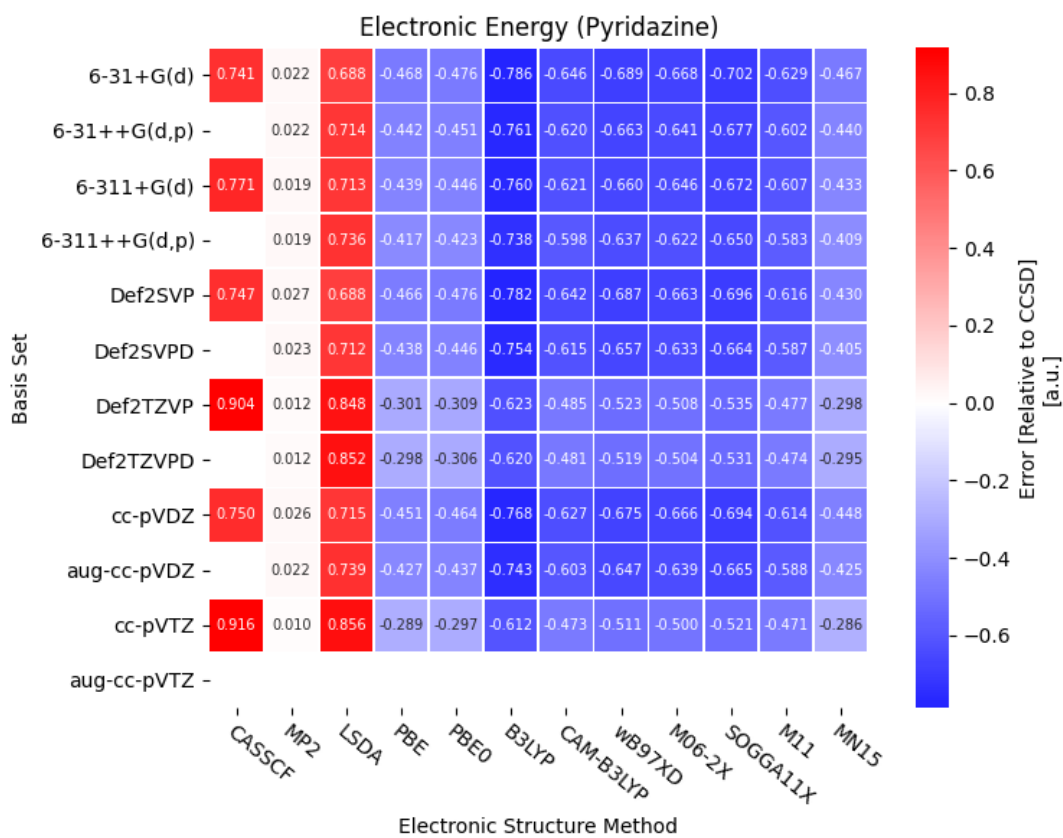

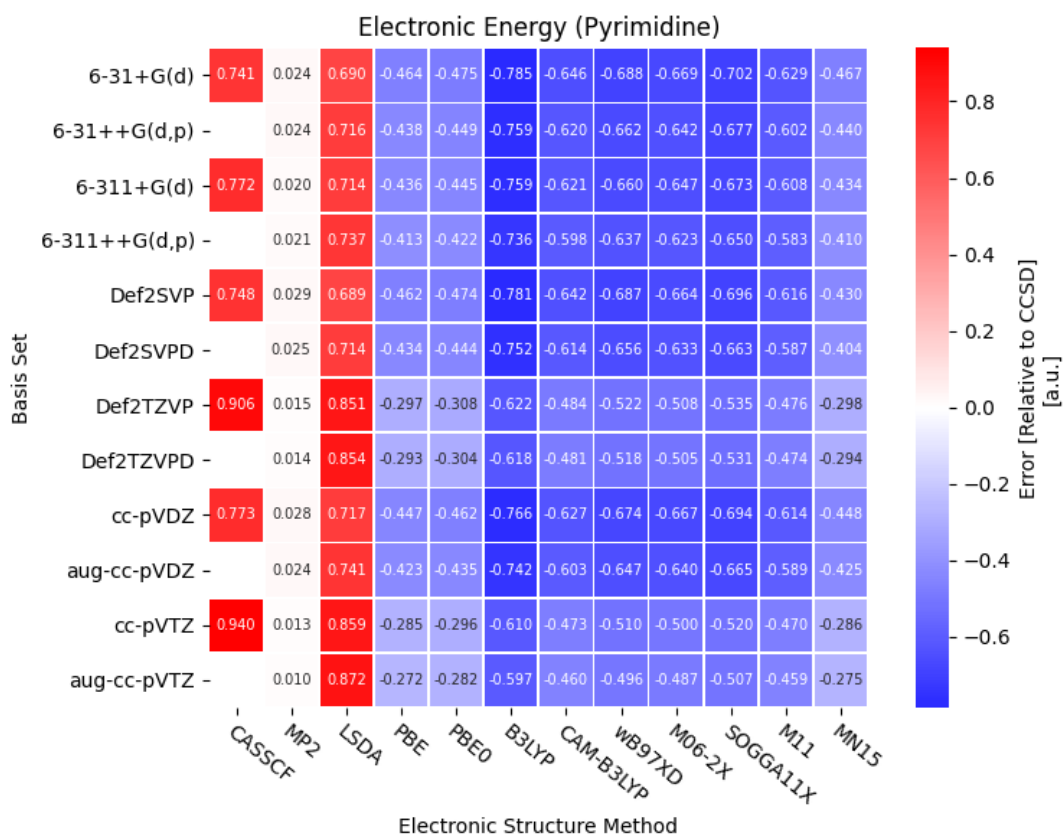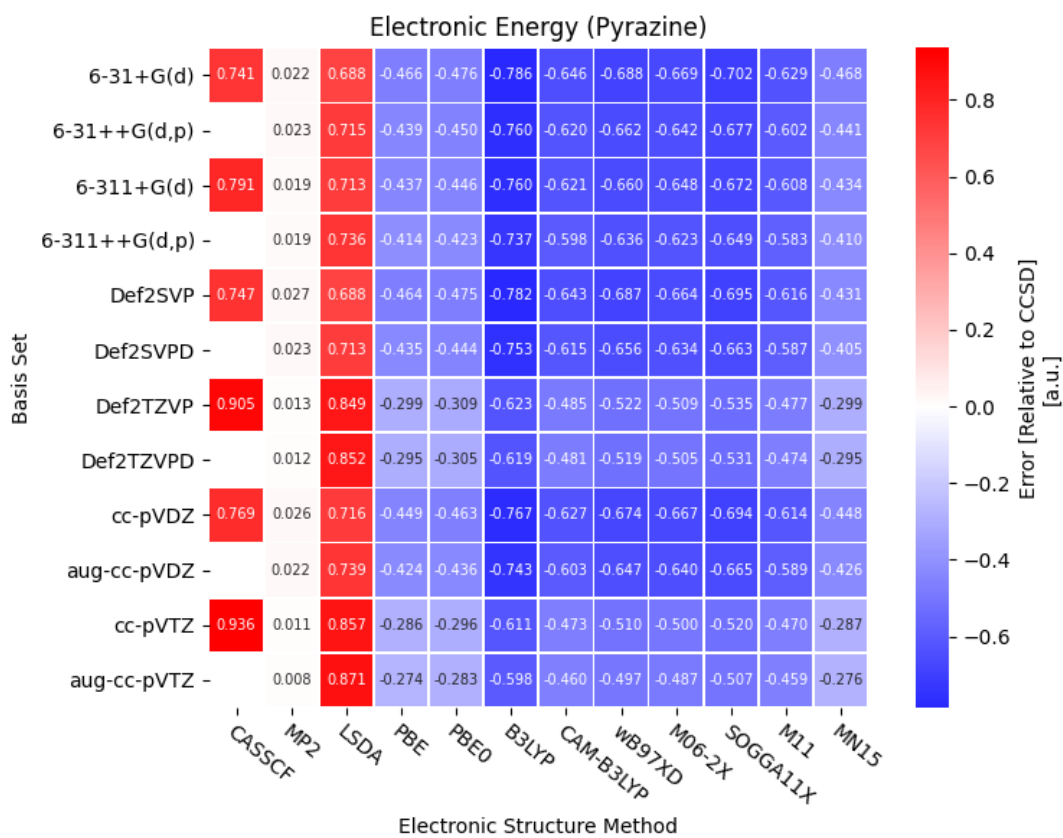

## D.7 Zero Point Energy

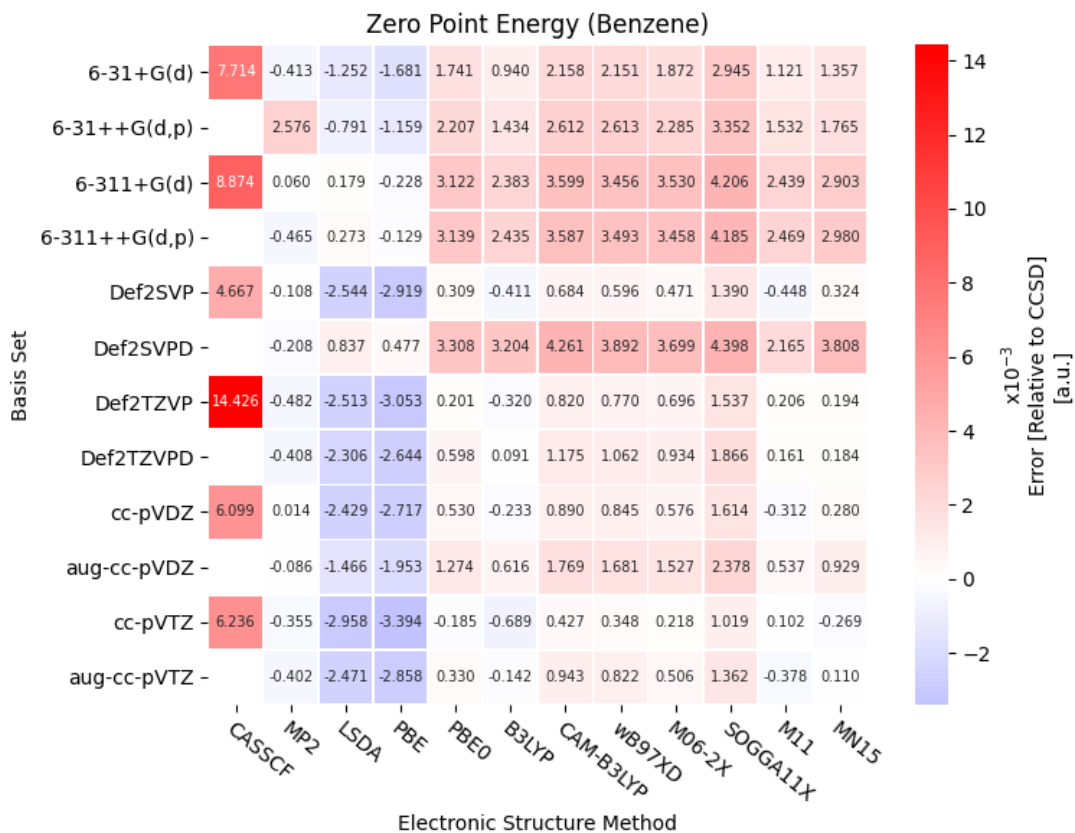

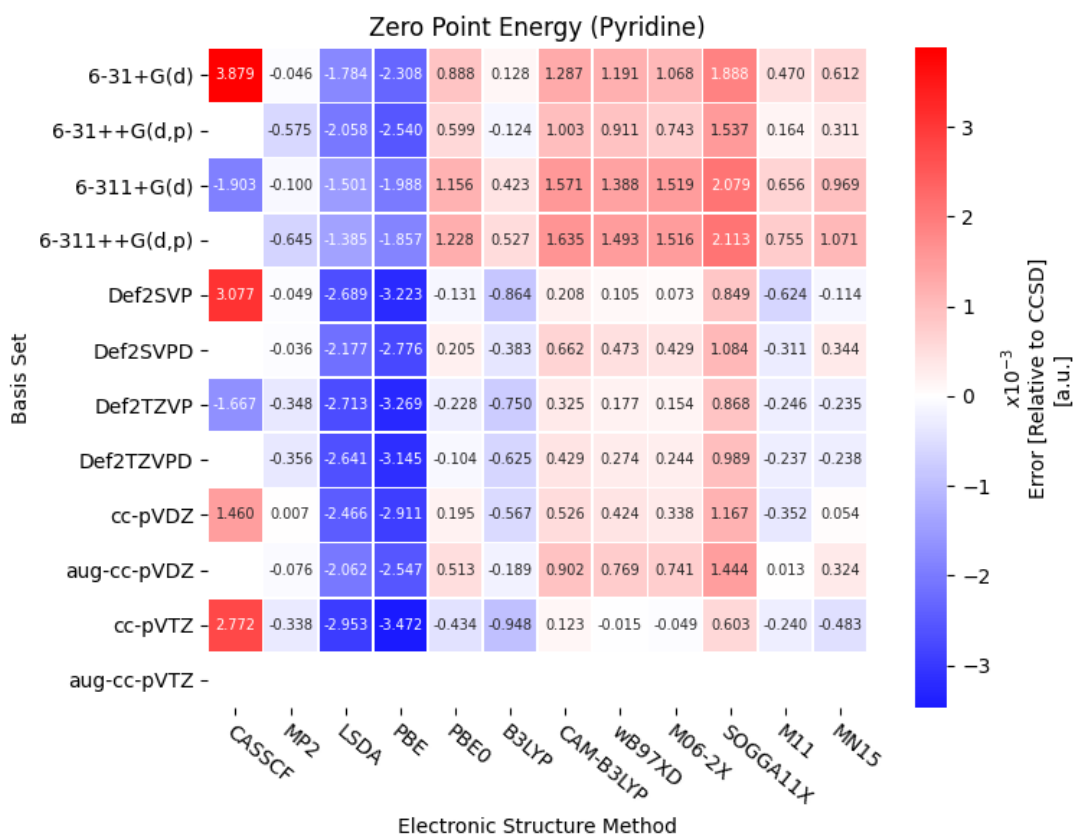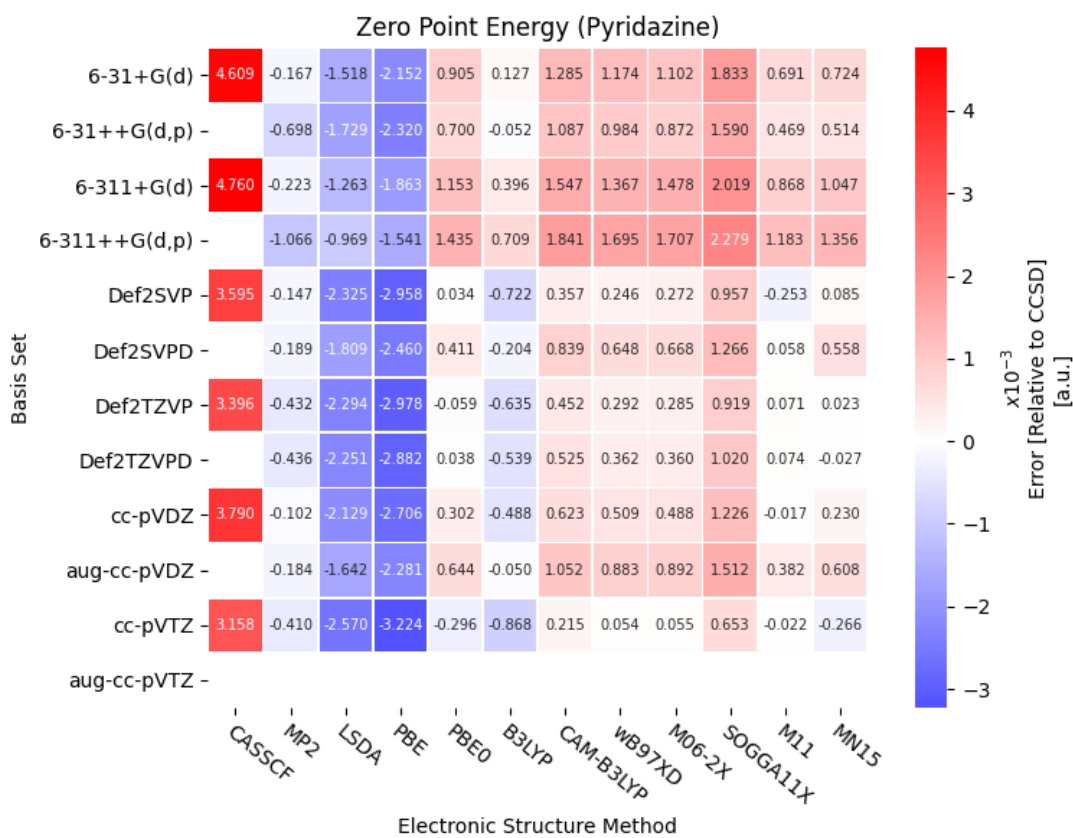

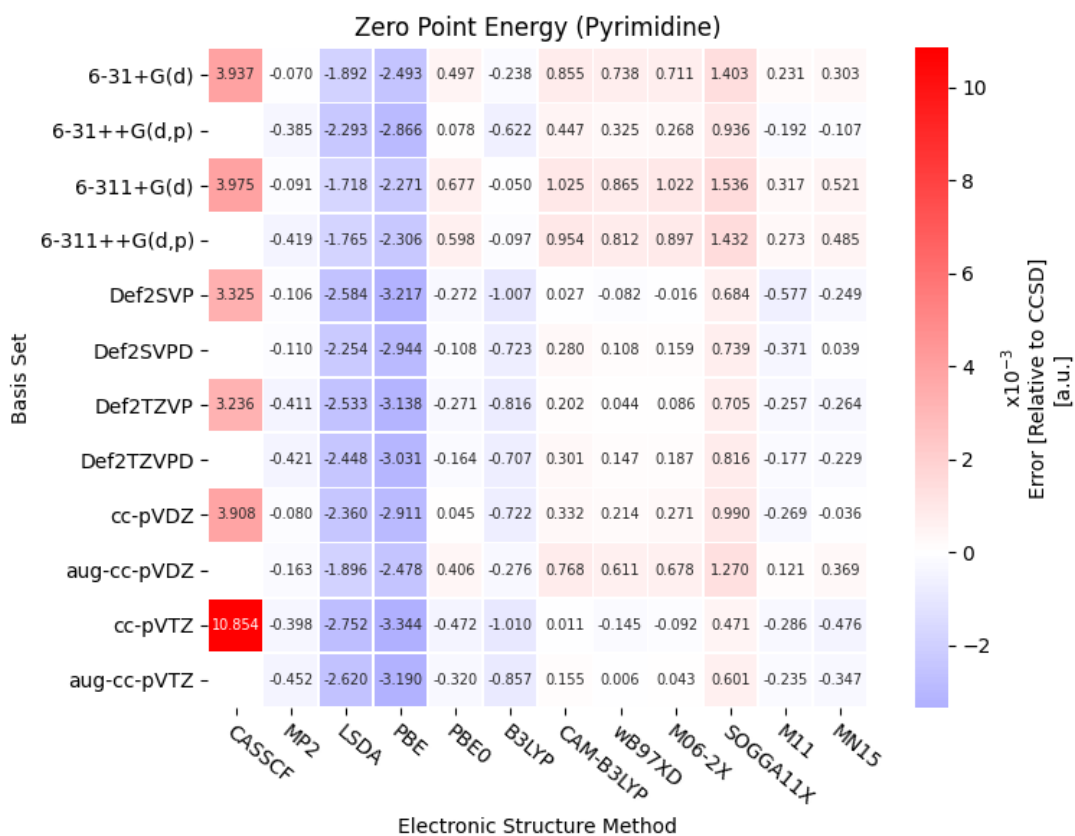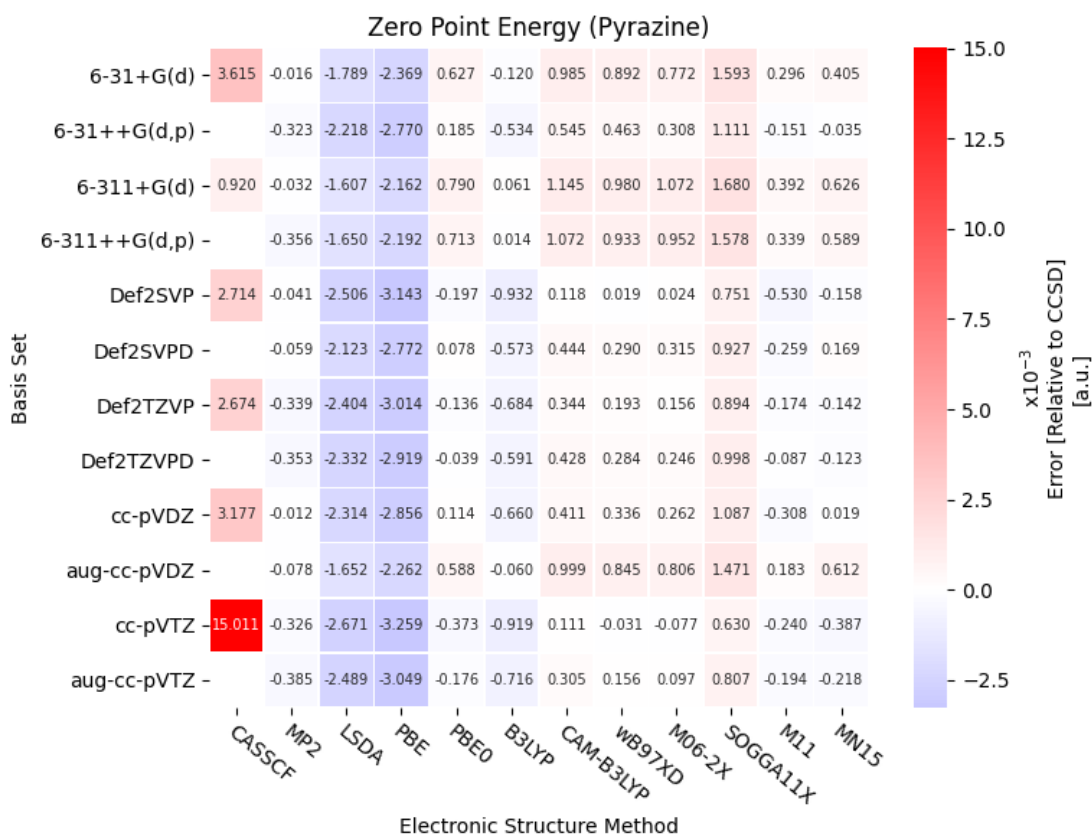

## D.8 Sum of Electronic Energy and ZPE

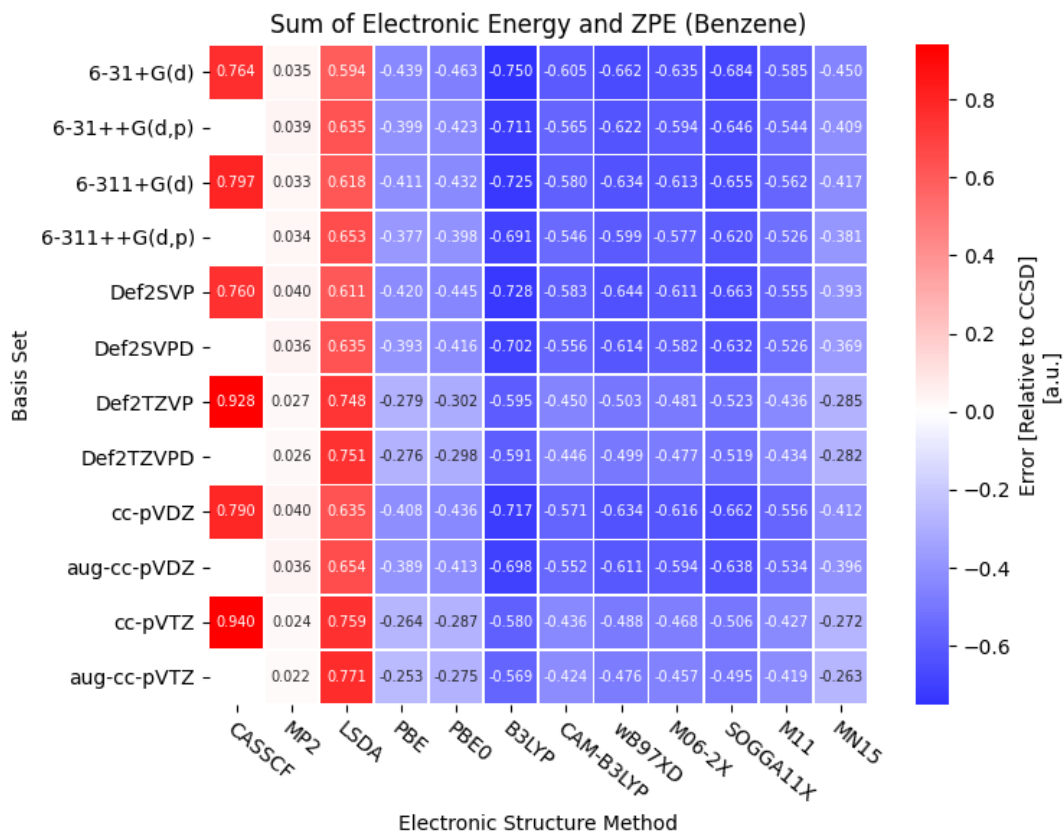

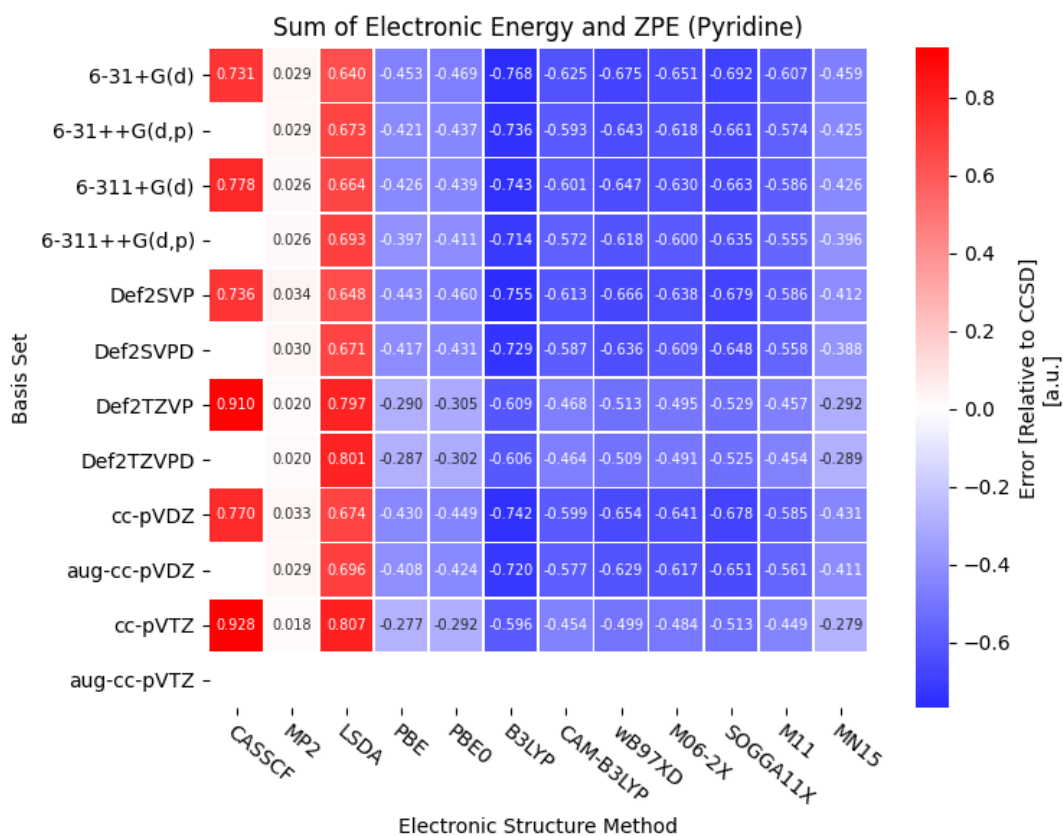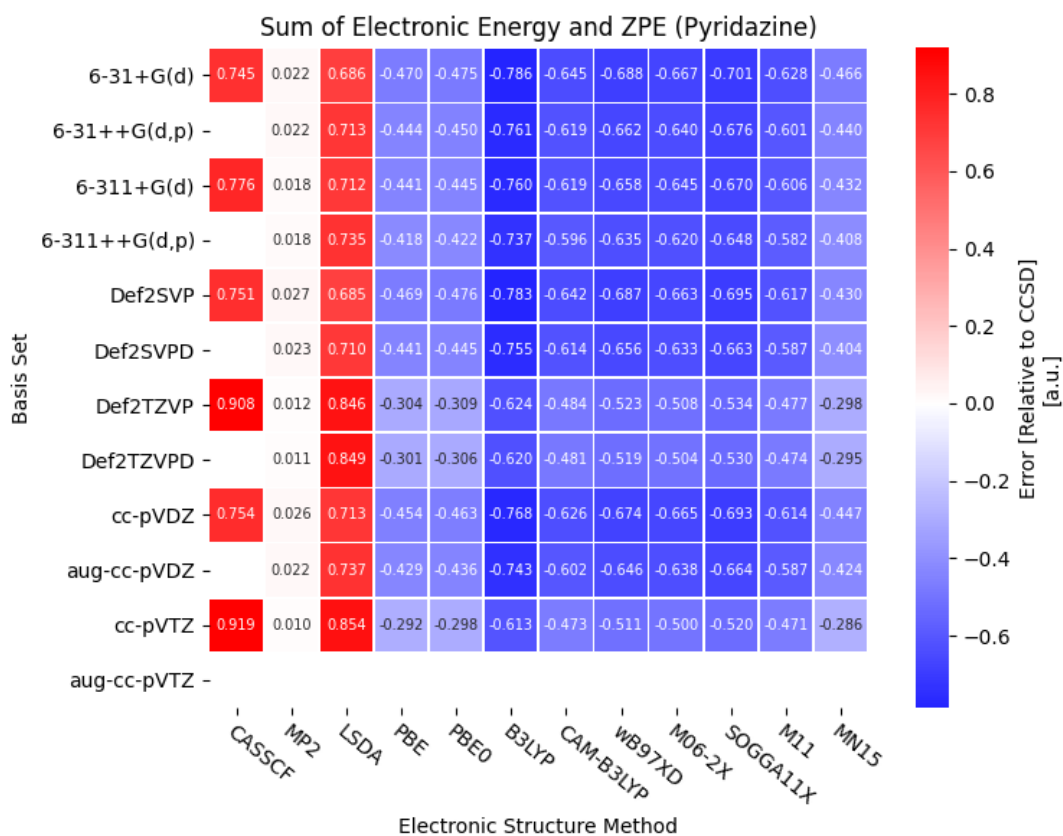

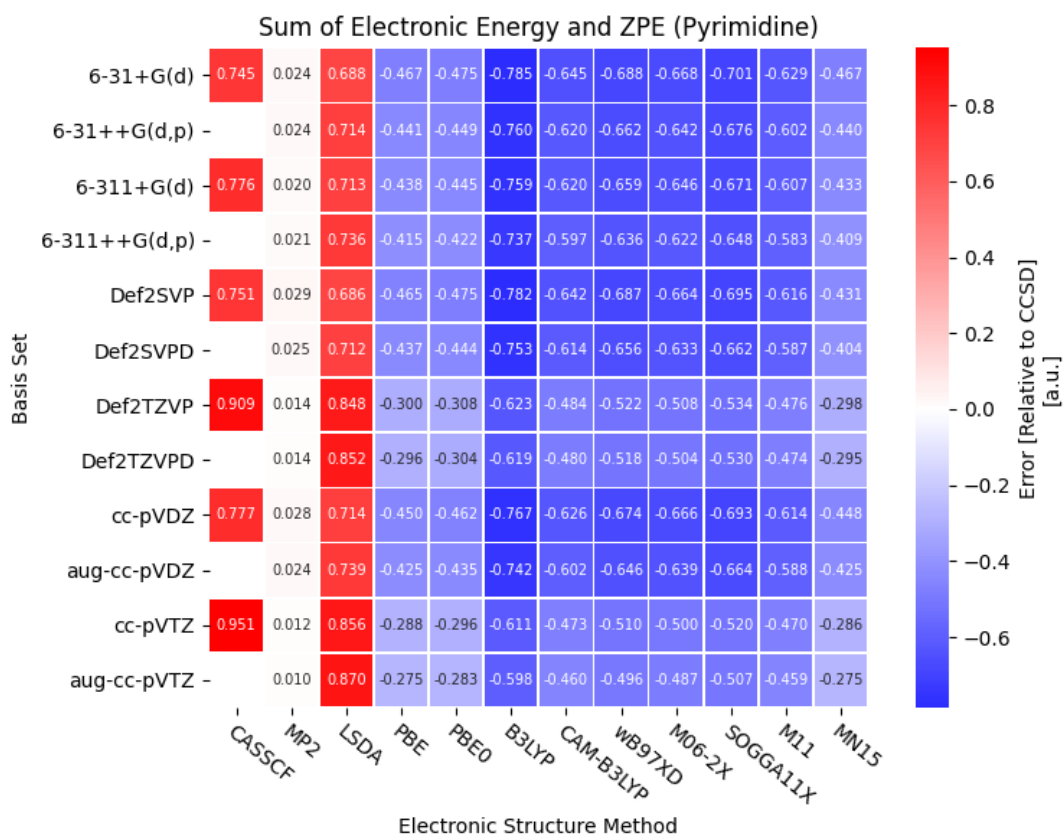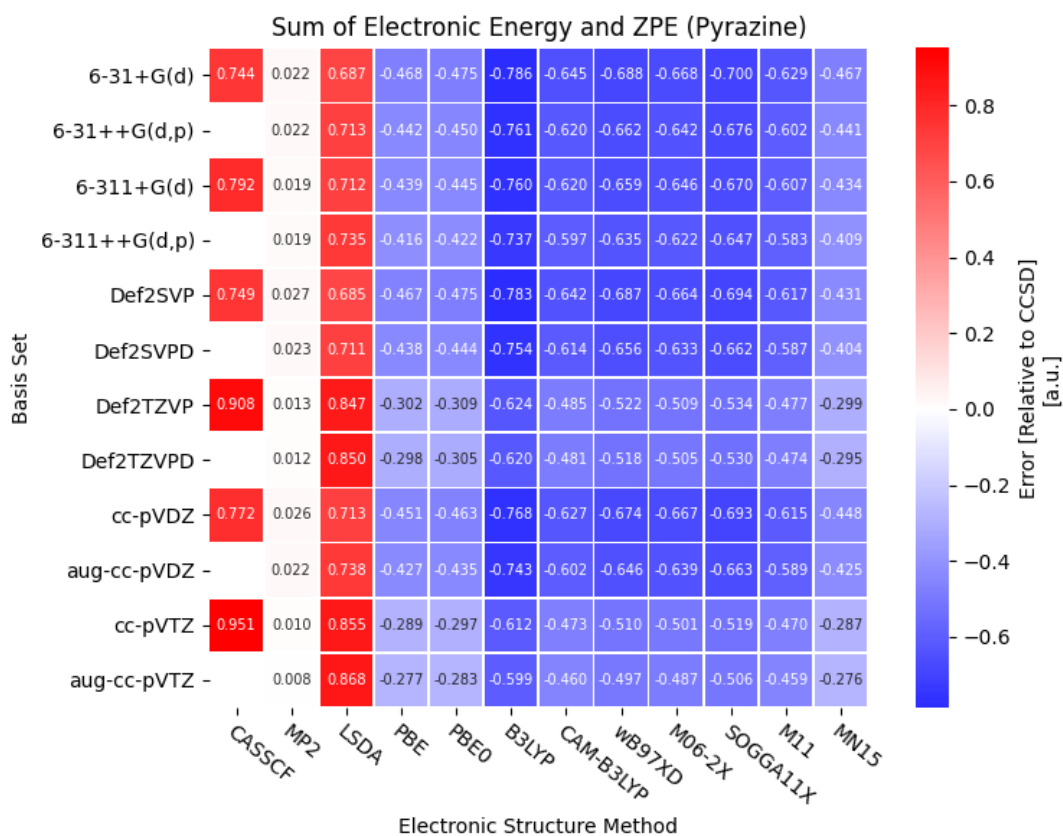



## E Internal Coordinate Representations

The internal coordinate representation of the five molecules are listed in the following:

Benzene

```
X
X 1 1.0
C 1 cx 2 90.0
C 1 cx 2 90.0 3 60.0
C 1 cx 2 90.0 4 60.0
C 1 cx 2 90.0 5 60.0
C 1 cx 2 90.0 6 60.0
C 1 cx 2 90.0 7 60.0
H 1 hx 2 90.0 3 0.0
H 1 hx 2 90.0 4 0.0
H 1 hx 2 90.0 5 0.0
H 1 hx 2 90.0 6 0.0
H 1 hx 2 90.0 7 0.0
H 1 hx 2 90.0 8 0.0
```

```
cx = 1.30
hx = 2.30
```

Pyridazine

```
X
X 1 1.0
N 1 cx 2 90.0
N 1 cx 2 90.0 3 60.0
C 1 cx 2 90.0 4 60.0
C 1 cx 2 90.0 5 60.0
C 1 cx 2 90.0 6 60.0
C 1 cx 2 90.0 7 60.0
H 1 hx 2 90.0 5 0.0
H 1 hx 2 90.0 6 0.0
H 1 hx 2 90.0 7 0.0
H 1 hx 2 90.0 8 0.0
```

```
cx = 1.30
hx = 2.30
```

## Pyridine

c  
 c 1 cc2  
 c 2 cc3 1 ccc3  
 n 3 nc4 2 ncc4 1 dih4  
 c 4 cn5 3 cnc5 2 dih5  
 c 5 cc6 4 ccn6 3 dih6  
 h 2 hc7 1 hcc7 3 dih7  
 h 3 hc8 2 hcc8 4 dih8  
 h 5 hc9 4 hcn9 3 dih9  
 h 6 hc10 5 hcc10 4 dih10  
 h 1 hc11 6 hcc11 2 dih11

cc2 = 1.400000  
 cc3 = 1.400000  
 ccc3 = 120.000  
 nc4 = 1.400000  
 ncc4 = 120.000  
 dih4 = 0.000  
 cn5 = 1.400000  
 cnc5 = 120.000  
 dih5 = 0.000  
 cc6 = 1.400000  
 ccn6 = 120.000  
 dih6 = 0.000  
 hc7 = 1.089000  
 hcc7 = 120.000  
 dih7 = 180.000  
 hc8 = 1.089000  
 hcc8 = 120.000  
 dih8 = 180.000  
 hc9 = 1.089000  
 hcn9 = 120.000  
 dih9 = 180.000  
 hc10 = 1.089000  
 hcc10 = 120.000  
 dih10 = 180.000  
 hc11 = 1.070000  
 hcc11 = 120.000  
 dih11 = 180.000

## Pyrimidine

n  
 c 1 cn2  
 c 2 cc3 1 ccn3  
 c 3 cc4 2 ccc4 1 dih4  
 n 4 nc5 3 ncc5 2 dih5  
 c 5 cn6 4 cnc6 3 dih6  
 h 2 hc7 1 hcn7 3 dih7  
 h 3 hc8 2 hcc8 4 dih8  
 h 4 hc9 3 hcc9 5 dih9  
 h 6 hc10 5 hcn10 4 dih10

cn2 = 1.400000  
 cc3 = 1.400000  
 ccn3 = 120.000  
 cc4 = 1.400000  
 ccc4 = 120.000  
 dih4 = 0.000  
 nc5 = 1.400000  
 ncc5 = 120.000  
 dih5 = 0.000  
 cn6 = 1.400000  
 cnc6 = 120.000  
 dih6 = 0.000  
 hc7 = 1.089000  
 hcn7 = 120.000  
 dih7 = 180.000  
 hc8 = 1.089000  
 hcc8 = 120.000  
 dih8 = 180.000  
 hc9 = 1.089000  
 hcc9 = 120.000  
 dih9 = 180.000  
 hc10 = 1.089000  
 hcn10 = 120.000  
 dih10 = 180.000

## Pyrazine

n  
 c 1 cn2  
 c 2 cc3 1 ccn3  
 n 3 nc4 2 ncc4 1 dih4  
 c 4 cn5 3 cnc5 2 dih5  
 c 5 cc6 4 ccn6 3 dih6  
 h 2 hc7 1 hcn7 3 dih7  
 h 3 hc8 2 hcc8 4 dih8  
 h 5 hc9 4 hcn9 3 dih9  
 h 6 hc10 5 hcc10 4 dih10

cn2 = 1.400000  
 cc3 = 1.400000  
 ccn3 = 120.000  
 nc4 = 1.400000  
 ncc4 = 120.000  
 dih4 = 0.000  
 cn5 = 1.400000  
 cnc5 = 120.000  
 dih5 = 0.000  
 cc6 = 1.400000  
 ccn6 = 120.000  
 dih6 = 0.000  
 hc7 = 1.089000  
 hcn7 = 120.000  
 dih7 = 180.000  
 hc8 = 1.089000  
 hcc8 = 120.000  
 dih8 = 180.000  
 hc9 = 1.089000  
 hcn9 = 120.000  
 dih9 = 180.000  
 hc10 = 1.089000  
 hcc10 = 120.000  
 dih10 = 180.000

## F Route Section and Calculation Setup

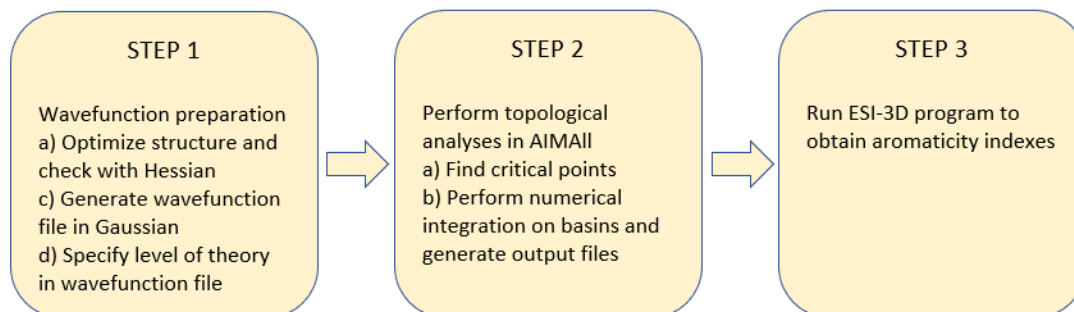

Scheme S1: Flowchart of computational approach.

Generic route section for the calculations in Gaussian 16:

```
%chk=checkpoint_file.chk  
# opt freq electronic_structure_method/basis_set density=current  
output=wfx  
  
Title Card  
  
0 1  
Internal_coordinate_representation  
  
wavefunction_file.wfx
```

Calculation setup for the wavefunction partition in the AIMAll software package:

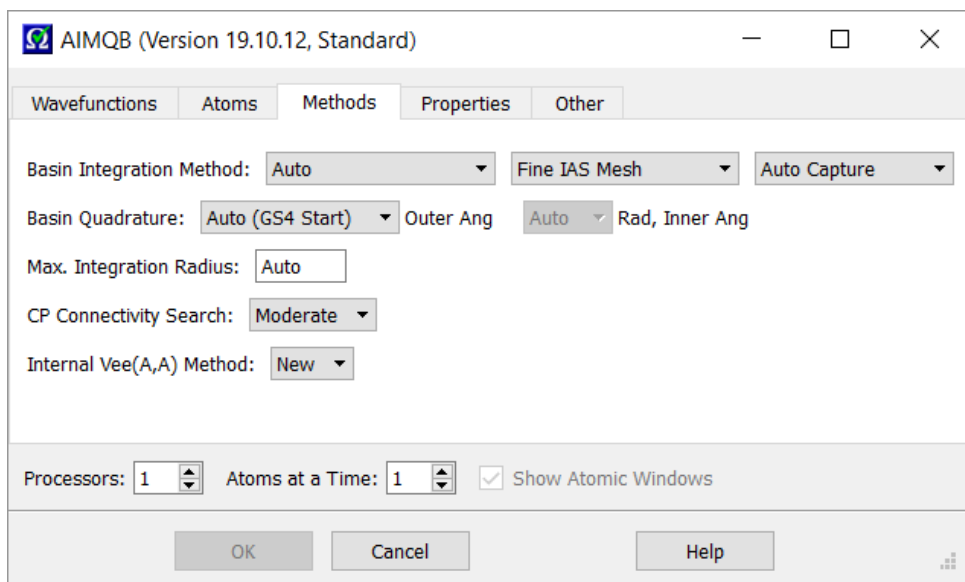

Generic input file (bad.in) for the ESI-3D calculations:

```
$TITLE
Title Card
$FULLOUT
$READWFN
wavefunction_file.wfx
$RING
  1 rings found
  6 members of 1th ring
  1 2 3 4 5 6
!$MULTPART
6
1 2 3 4 5 6
$AV124
$AV1245
```
